# Supplementary material for: N-Methyl deuterated rhodamines for protein labelling in sensitive fluorescence microscopy
Source: PubMed Central journal article supplement (PMC9337740; doi:10.1039/d1sc06466e), 2022-06-28
Supplement: SC-013-D1SC06466E-s001.pdf [file SC-013-D1SC06466E-s001.pdf]

Supplemental Information for:

## ***N*-Methyl deuterated rhodamines for protein labelling in sensitive fluorescence microscopy**

Kilian Roßmann<sup>1,7</sup>, Kerem C. Akkaya<sup>2,7</sup>, Pascal Poc<sup>1</sup>, Corentin Charbonnier<sup>1</sup>, Jenny Eichhorst<sup>2</sup>, Hannes Gonschior<sup>2</sup>, Abha Valavalkar<sup>5</sup>, Nicolas Wendler<sup>6</sup>, Thorben Cordes<sup>6</sup>, Benjamin Dietzek-Ivanšić<sup>5</sup>, Ben Jones<sup>3</sup>, Martin Lehmann<sup>2,\*</sup>, and Johannes Broichhagen<sup>1,4,\*</sup>

<sup>1</sup> Leibniz-Forschungsinstitut für Molekulare Pharmakologie, Berlin, Germany.

<sup>2</sup> Department of Pharmacology and Cell Biology, Leibniz-Forschungsinstitut für Molekulare Pharmakologie, Berlin, Germany.

<sup>3</sup> Section of Endocrinology and Investigative Medicine, Imperial College London, London W12 0NN, United Kingdom.

<sup>4</sup> Department of Chemical Biology, Max Planck Institute for Medical Research, Heidelberg, Germany.

<sup>5</sup> Leibniz Institute for Photonic Technology Jena e.V. (Leibniz-IPHT), Research Department Functional Interfaces, Jena, Germany.

<sup>6</sup> Physical and Synthetic Biology, Faculty of Biology, Ludwig-Maximilians-Universität München, Großhadernerstr. 2-4, 82152 Planegg-Martinsried, Germany

<sup>7</sup> These authors contributed equally.

To whom correspondence should be addressed:  
mlehmann@fmp-berlin.de and broichhagen@fmp-berlin.de

## Table of Contents

|                                                                                                                                                                                                                         |           |
|-------------------------------------------------------------------------------------------------------------------------------------------------------------------------------------------------------------------------|-----------|
| <b>1. General</b>                                                                                                                                                                                                       | <b>4</b>  |
| <b>2. Synthesis</b>                                                                                                                                                                                                     | <b>6</b>  |
| 2.1. General procedure A for fluorophore coupling                                                                                                                                                                       | 6         |
| 2.2. 2-(6-(Bis(methyl-d <sub>3</sub> )amino)-3-(bis(methyl-d <sub>3</sub> )iminio)-3H-xanthen-9-yl)-4-carboxybenzoate (2)                                                                                               | 6         |
| 2.3. 4-((4-(((2-Amino-9H-purin-6-yl)oxy)methyl)benzyl)carbamoyle)-2-(6-(bis(methyl-d <sub>3</sub> )amino)-3-(bis(methyl-d <sub>3</sub> )iminio)-3H-xanthen-9-yl)benzoate (BG-TMR-d12)                                   | 7         |
| 2.4. 2-(6-(Bis(methyl-d <sub>3</sub> )amino)-3-(bis(methyl-d <sub>3</sub> )iminio)-3H-xanthen-9-yl)-4-((2-(2-((6-chlorohexyl)oxy)ethoxy)ethyl)carbamoyle)benzoate (CA-TMR-d12)                                          | 8         |
| 2.5. 3,7-Bis(bis(methyl-d <sub>3</sub> )amino)-5,5-dimethyl-3'-oxo-3'H,5H-spiro[dibenzo[b,e]silin-10,1'-isobenzofuran]-6'-carboxylic acid (4)                                                                           | 9         |
| 2.6. 4-((4-(((2-Amino-9H-purin-6-yl)oxy)methyl)benzyl)carbamoyle)-2-(7-(bis(methyl-d <sub>3</sub> )amino)-3-(bis(methyl-d <sub>3</sub> )iminio)-5,5-dimethyl-3,5-dihydrodibenzo[b,e]silin-10-yl)benzoate (BG-SiR-d12)   | 10        |
| 2.7. 2-(7-(Bis(methyl-d <sub>3</sub> )amino)-3-(bis(methyl-d <sub>3</sub> )iminio)-5,5-dimethyl-3,5-dihydrodibenzo[b,e]silin-10-yl)-4-((2-(2-((6-chlorohexyl)oxy)ethoxy)ethyl)carbamoyle)benzoate (CA-SiR-d12)          | 11        |
| 2.8. 2-(6-(Bis(methyl-d <sub>3</sub> )amino)-3-(bis(methyl-d <sub>3</sub> )iminio)-3H-xanthen-9-yl)-4-((2-(2,5-dioxo-2,5-dihydro-1H-pyrrol-1-yl)ethyl)carbamoyle)benzoate (Mal-TMR-d12)                                 | 12        |
| 2.9. 2-(7-(Bis(methyl-d <sub>3</sub> )amino)-3-(bis(methyl-d <sub>3</sub> )iminio)-5,5-dimethyl-3,5-dihydrodibenzo[b,e]silin-10-yl)-4-((2-(2,5-dioxo-2,5-dihydro-1H-pyrrol-1-yl)ethyl)carbamoyle)benzoate (Mal-SiR-d12) | 12        |
| 2.10. LUXendin651-d12                                                                                                                                                                                                   | 13        |
| 2.11. 7-(Dimethylamino)-4-methyl-2H-chromen-2-one (Coumarin 461)                                                                                                                                                        | 13        |
| 2.12. 4-Methyl-7-((methyl-d <sub>3</sub> )amino)-2H-chromen-2-one (6)                                                                                                                                                   | 14        |
| 2.13. 4-Methyl-7-(methyl(methyl-d <sub>3</sub> )amino)-2H-chromen-2-one (Coumarin 461-d3)                                                                                                                               | 14        |
| 2.14. 7-(Bis(methyl-d <sub>3</sub> )amino)-4-methyl-2H-chromen-2-one (Coumarin 461-d6)                                                                                                                                  | 15        |
| 2.15. N,N-Dimethyl-7-nitrobenzo[c][1,2,5]oxadiazol-4-amine (NBD)                                                                                                                                                        | 15        |
| 2.16. N,N-Bis(methyl-d <sub>3</sub> )-7-nitrobenzo[c][1,2,5]oxadiazol-4-amine (NBD-d6)                                                                                                                                  | 16        |
| 2.17. 3,7-Bis(dimethylamino)phenothiazin-5-ium (Methylene Blue)                                                                                                                                                         | 16        |
| 2.18. 3,7-Bis(bis(methyl-d <sub>3</sub> )amino)phenothiazin-5-ium (Methylene Blue-d12)                                                                                                                                  | 17        |
| <b>3. NMR spectra</b>                                                                                                                                                                                                   | <b>18</b> |
| 3.1. 2-(6-(Bis(methyl-d <sub>3</sub> )amino)-3-(bis(methyl-d <sub>3</sub> )iminio)-3H-xanthen-9-yl)-4-carboxybenzoate (2)                                                                                               | 18        |
| 3.2. 4-((4-(((2-Amino-9H-purin-6-yl)oxy)methyl)benzyl)carbamoyle)-2-(6-(bis(methyl-d <sub>3</sub> )amino)-3-(bis(methyl-d <sub>3</sub> )iminio)-3H-xanthen-9-yl)benzoate (BG-TMR-d12)                                   | 20        |
| 3.3. 2-(6-(Bis(methyl-d <sub>3</sub> )amino)-3-(bis(methyl-d <sub>3</sub> )iminio)-3H-xanthen-9-yl)-4-((2-(2-((6-chlorohexyl)oxy)ethoxy)ethyl)carbamoyle)benzoate (CA-TMR-d12)                                          | 22        |
| 3.4. 3,7-Bis(bis(methyl-d <sub>3</sub> )amino)-5,5-dimethyl-3'-oxo-3'H,5H-spiro[dibenzo[b,e]silin-10,1'-isobenzofuran]-6'-carboxylic acid (4)                                                                           | 24        |
| 3.5. 4-((4-(((2-Amino-9H-purin-6-yl)oxy)methyl)benzyl)carbamoyle)-2-(7-(bis(methyl-d <sub>3</sub> )amino)-3-(bis(methyl-d <sub>3</sub> )iminio)-5,5-dimethyl-3,5-dihydrodibenzo[b,e]silin-10-yl)benzoate (BG-SiR-d12)   | 26        |
| 3.6. 2-(7-(Bis(methyl-d <sub>3</sub> )amino)-3-(bis(methyl-d <sub>3</sub> )iminio)-5,5-dimethyl-3,5-dihydrodibenzo[b,e]silin-10-yl)-4-((2-(2-((6-chlorohexyl)oxy)ethoxy)ethyl)carbamoyle)benzoate (CA-SiR-d12)          | 28        |
| 3.7. 2-(6-(Bis(methyl-d <sub>3</sub> )amino)-3-(bis(methyl-d <sub>3</sub> )iminio)-3H-xanthen-9-yl)-4-((2-(2,5-dioxo-2,5-dihydro-1H-pyrrol-1-yl)ethyl)carbamoyle)benzoate (Mal-TMR-d12)                                 | 30        |

|           |                                                                                                                                                                                         |           |
|-----------|-----------------------------------------------------------------------------------------------------------------------------------------------------------------------------------------|-----------|
| 3.8.      | 2-(7-(bis(methyl-d3)amino)-3-(bis(methyl-d3)iminio)-5,5-dimethyl-3,5-dihydrodibenzo[b,e]silin-10-yl)-4-((2-(2,5-dioxo-2,5-dihydro-1H-pyrrol-1-yl)ethyl)carbamoyl)benzoate (Mal-SiR-d12) | 32        |
| 3.9.      | 7-(Dimethylamino)-4-methyl-2H-chromen-2-one (Coumarin 461)                                                                                                                              | 34        |
| 3.10.     | 4-Methyl-7-((methyl-d3)amino)-2H-chromen-2-one (6)                                                                                                                                      | 36        |
| 3.11.     | 4-Methyl-7-(methyl(methyl-d3)amino)-2H-chromen-2-one (Coumarin 461-d3)                                                                                                                  | 38        |
| 3.12.     | 7-(Bis(methyl-d3)amino)-4-methyl-2H-chromen-2-one (Coumarin 461-d6)                                                                                                                     | 40        |
| 3.13.     | N,N-Dimethyl-7-nitrobenzo[c][1,2,5]oxadiazol-4-amine (NBD)                                                                                                                              | 42        |
| 3.14.     | N,N-Bis(methyl-d3)-7-nitrobenzo[c][1,2,5]oxadiazol-4-amine (NBD-d6)                                                                                                                     | 44        |
| 3.15.     | 3,7-Bis(dimethylamino)phenothiazin-5-ium (Methylene Blue)                                                                                                                               | 46        |
| 3.16.     | 3,7-Bis(bis(methyl-d3)amino)phenothiazin-5-ium (Methylene Blue-d12)                                                                                                                     | 48        |
| <b>4.</b> | <b>SNAP<sub>f</sub> construct</b>                                                                                                                                                       | <b>50</b> |
| <b>5.</b> | <b>SNAP-Halo construct and mass spectrometry</b>                                                                                                                                        | <b>50</b> |
| <b>6.</b> | <b>Supplementary Figures</b>                                                                                                                                                            | <b>51</b> |
| <b>7.</b> | <b>Supplementary Schemes</b>                                                                                                                                                            | <b>54</b> |
| <b>8.</b> | <b>Supplementary Tables</b>                                                                                                                                                             | <b>56</b> |
| <b>9.</b> | <b>References</b>                                                                                                                                                                       | <b>57</b> |

## 1. General

All chemical reagents and anhydrous solvents for synthesis were purchased from commercial suppliers (Sigma-Aldrich, Fluka, Acros, Fluorochem, TCI) and were used without further purification if not stated otherwise. Commercial coumarin 461 and methylene blue were HPLC purified before concentration assessment and measuring photophysical properties to ensure similar purity and composition as their synthesizes, deuterated counterparts. BG-TMR and BG-SiR were described before.<sup>1</sup>

NMR spectra were recorded at 300 K in deuterated solvents on a Bruker AVANCE III HD 400 equipped with a CryoProbe or on Bruker AV-III spectrometers using either a cryogenically cooled 5 mm TCI-triple resonance probe equipped with one-axis self-shielded gradients or room-temperature 5 mm broadband probe and calibrated to residual solvent peaks (<sup>1</sup>H/<sup>13</sup>C in ppm): DMSO-d<sub>6</sub> (2.50/39.52), MeOD-d<sub>4</sub> (3.31/49.00). Multiplicities are abbreviated as follows: s = singlet, d = doublet, t = triplet, q = quartet, p = pentet, h = heptet, br = broad, m = multiplet. Coupling constants *J* are reported in Hz. Spectra are reported based on appearance, not on theoretical multiplicities derived from structural information. This also concerns the report on <sup>13</sup>C NMR, where not all signals were obtained even after long-time recording (presumably quaternary carbons since they do not experience an NOE and relaxation is slower), which is annotated for the respective molecules below.

UPLC-UV/Vis for purity assessment was performed on a Waters H-class instrument equipped with a quaternary solvent manager, a Waters autosampler, a Waters TUV detector and a Waters Acquity QDa detector with an Acquity UPLC BEH C18 1.7 μm, 2.1 × 50 mm RP column (Waters Corp., USA). Buffer A: 0.1% TFA in H<sub>2</sub>O Buffer B: 0.1% TFA in MeCN. The typical gradient was from 5% B for 0.5 min; gradient to 95% B over 3.0 min; 95% B for 0.9 min; gradient to 5% B over 1.1 min with 0.6 mL/min flow. LC-MS was performed on i) a Shimadzu MS2020 connected to a Nexera UHPLC system equipped with a Waters ACQUITY UPLC BEH C18 (1.7 μm, 50 × 2.1 mm). Buffer A: 0.1% FA in H<sub>2</sub>O Buffer B: acetonitrile. The typical gradient was from 10% B for 0.5 min → gradient to 90% B over 4.5 min → 90% B for 0.5 min → gradient to 99% B over 0.5 min with 1 mL/min flow, or ii) an Agilent 1260 Infinity II LC System equipped with Agilent SB-C18 column (1.8 μm, 2.1 × 50 mm). Buffer A: 0.1% FA in H<sub>2</sub>O Buffer B: 0.1% FA acetonitrile. The typical gradient was from 10% B for 0.5 min → gradient to 95% B over 5 min → 95% B for 0.5 min → gradient to 99% B over 1 min with 0.8 mL/min flow. Retention times (*t<sub>R</sub>*) are given in minutes (min). Chromatograms were imported into Graphpad Prism8 and purity was determined by calculating AUC ratios.

Preparative or semi-preparative HPLC was performed on different instruments. i) A Shimadzu Prominence 20A system or a Shimadzu Prominence 8A system (both Shimadzu Corporation, Kyoto, Japan) equipped with columns as followed: preparative column – Nucleodur C18 HTec, 5 μm, 250x32 mm; semi-preparative column – Nucleodur C18 HTec, 5 μm, 250x21 mm (all columns purchased from Macherey-Nagel, GmbH & Co. KG, Düren, Germany). Eluents A (0.1% TFA in H<sub>2</sub>O) and B (0.1% TFA in MeCN) were applied as a linear gradient. Peak detection was performed at maximal absorbance wavelength. ii) An Agilent 1260 Infinity II LC System equipped with columns as followed: preparative column – Reprospher 100 C18 columns (10 μm: 50 x 30 mm at 20 mL/min flow rate; semi-preparative column – 5 μm: 250 x 10 mm at 4 mL/min flow rate. Eluents A (0.1% TFA in H<sub>2</sub>O) and B (0.1% TFA in MeCN) were applied as a linear gradient. Peak detection was performed at maximal absorbance wavelength. iii) A Waters e2695 system on a Supelco Ascentis® C18 HPLC Column (5 μm, 250 × 21.2 mm at 8 mL/min). Eluents A (0.1% TFA in H<sub>2</sub>O) and B (0.1% TFA in MeCN) were applied as a linear gradient.

High resolution mass spectrometry was performed on different instruments. i) A Bruker maXis II ETD hyphenated with a Shimadzu Nexera system. The instruments were controlled via Bruker's ofControl 4.1 and Hystar 4.1 SR2 (4.1.31.1) software. The acquisition rate was set to 3 Hz and the following source parameters were used for positive mode electrospray ionization: End plate offset = 500 V; capillary voltage = 3800 V; nebulizer gas pressure = 45 psi; dry gas flow = 10 L/min; dry temperature = 250 °C. Transfer, quadrupole and collision cell settings are mass range dependent and were fine-adjusted with consideration of the respective analyte's molecular weight. For internal calibration sodium format clusters were used. Samples were desalted via fast liquid chromatography. A Supelco Titan™ C18 UHPLC Column, 1.9 µm, 80 Å pore size, 20 × 2.1 mm and a 2 min gradient from 10 to 98% aqueous MeCN with 0.1% FA (H<sub>2</sub>O: Carl Roth GmbH + Co. KG ROTISOLV® Ultra LC-MS; MeCN: Merck KGaA LiChrosolv® Acetonitrile hypergrade for LC-MS; FA - Merck KGaA LiChropur® Formic acid 98%–100% for LC-MS) was used for separation. Sample dilution in 10% aqueous MeCN (hyper grade) and injection volumes were chosen dependent of the analyte's ionization efficiency. Hence, on-column loadings resulted between 0.25–5.0 ng. Automated internal re-calibration and data analysis of the recorded spectra were performed with Bruker's DataAnalysis 4.4 SR1 software. ii) An Agilent Technologies 6230 series accurate mass TOF LC-MS linked to an Agilent Technologies 1290 Infinity Series machine with a Thermo Accucore™ RP-MS column, 2.6 µm pore size, 30 × 2.1 mm, and a 3 min gradient from 5 to 99% aqueous MeCN with 0.1% TFA and MeCN with 0.1% TFA. flow rate: 0.8 mL/min; UV-detection: 220 nm, 254 nm, 300 nm.

Intact proteins were analyzed using a Waters H-class instrument equipped with a quaternary Solvent manager, a Waters sample manager-FTN, a Waters PDA detector and a Waters column manager with an Acquity UPLC protein BEH C4 column (300 Å, 1.7 µm, 2.1 mm x 50 mm). Proteins were eluted with a flow rate of 0.3 mL/min at a column temperature of 80 °C. The following gradient was used: A: 0.01% FA in H<sub>2</sub>O; B: 0.01% FA in MeCN. gradient 5-95% B from 0-6 min. Mass analysis was conducted with a Waters XEVO G2-XS QToF analyzer. Proteins were ionized in positive ion mode applying a cone voltage of 40 kV. Raw data was analyzed with MaxEnt 1. After deconvolution of the crude spectra, no single or non-labelled SNAP-Halo construct was observed, indicating complete reaction.

Flash column chromatography (FCC) was performed on a Biotage Isolera One with pre-packed silica columns (0.040–0.063 mm, 230-400 mesh, Silicycle). Reactions and chromatography fractions were monitored by thin layer chromatography (TLC) on Merck silica gel 60 F254 glass plates. The spots were visualized either under UV light at 254 nm and/or 366 nm or with appropriate staining method (iodine, *para*-anisaldehyde, KMnO<sub>4</sub>) followed by heating.

## 2. Synthesis

### 2.1. General procedure A for fluorophore coupling

In an Eppendorf tube, 1.0 equiv. of deuterated carboxy-dye was dissolved in 100  $\mu\text{L}/\text{mg}$  DMSO and 8.0 equiv. of DIPEA. Upon addition of 1.5 equiv. TSTU (from a 10 mg/mL stock in DMSO) the reaction mixture was vortexed and allowed to incubate for 10 min, before 1.5 equiv. of amine (BG-NH<sub>2</sub>, CA-NH<sub>2</sub> or Mal-NH<sub>2</sub> (*N*-(2-Aminoethyl)-maleinimid-trifluoroacetat; Aldrich: #56591) were added. The mixture was vortexed again and allowed to incubate for 60 min before it was quenched by addition of 20 equiv. of acetic acid and 25vol% of water. HPLC (MeCN:H<sub>2</sub>O+0.1% TFA = 10:90 to 90:10 over 60 minutes) provided the desired compound, which was aliquoted to 5 nmol and obtained as a colorful powders after lyophilization.

### 2.2. 2-(6-(Bis(methyl-d<sub>3</sub>)amino)-3-(bis(methyl-d<sub>3</sub>)iminio)-3*H*-xanthen-9-yl)-4-carboxybenzoate (2)

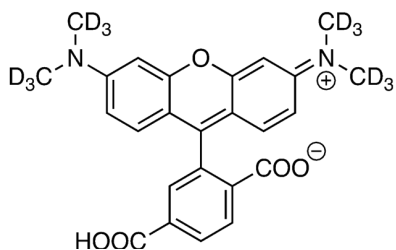

A Schlenk flask was charged under an argon atmosphere with 50.0 mg (71.8  $\mu\text{mol}$ , 1.0 equiv.) of *tert*-butyl 3-oxo-3',6'-bis(((trifluoromethyl)sulfonyl)oxy)-3*H*-spiro[isobenzofuran-1,9'-xanthene]-6-carboxylate<sup>2</sup> (**1**), 13.2 mg (14.4  $\mu\text{mol}$ , 0.2 equiv.) of tris(dibenzylideneacetone)-dipalladium(0) (Pd<sub>2</sub>dba<sub>3</sub>), 10.3 mg (21.5  $\mu\text{mol}$ , 0.3 equiv.) of 2-(dicyclohexylphosphino)-2',4',6'-triisopropylbiphenyl (XPhos), 112 mg (344  $\mu\text{mol}$ , 4.8 equiv.) of Cs<sub>2</sub>CO<sub>3</sub> and 18.9 mg (215  $\mu\text{mol}$ , 3.0 equiv.) of (D<sub>3</sub>C)<sub>2</sub>NH x HCl), before 2 mL of dry 1,4-dioxane were added via syringe. The reaction mixture was heated to 100 °C over night before it was cooled to room temperature and all volatiles were removed *in vacuo*. 10% TFA in DCM was added to the crude and the deprotection step was allowed to incubate at r.t. over 4 hours. After removal of all volatiles and reuptake of the crude in MeCN:H<sub>2</sub>O = 1:1, HPLC (MeCN:H<sub>2</sub>O+0.1% TFA = 10:90 to 90:10 over 60 minutes) provided 22.0 mg (49.7  $\mu\text{mol}$ ) of the desired compound as a red powder in 69% yield.

<sup>1</sup>H NMR (600 MHz, MeOD-d<sub>4</sub>):  $\delta$  [ppm] = 8.42–8.37 (m, 2H), 7.97 (d, *J* = 1.2 Hz, 1H), 7.14 (d, *J* = 9.5 Hz, 2H), 7.04 (dd, *J* = 9.5, 2.5 Hz, 2H), 6.96 (d, *J* = 2.4 Hz, 2H).

<sup>13</sup>C NMR (150 MHz, MeOD-d<sub>4</sub>):  $\delta$  [ppm] = 167.7, 167.4, 160.4, 159.1, 136.1, 135.9, 135.4, 132.8, 132.3, 132.0, 115.6, 114.9, 97.4. Two carbon signals missing.

HRMS (ESI): calc. for C<sub>25</sub>H<sub>11</sub>D<sub>12</sub>N<sub>2</sub>O<sub>5</sub> [M+H]<sup>+</sup>: 443.2355, found: 443.2352.

2.3. 4-((4-(((2-Amino-9*H*-purin-6-yl)oxy)methyl)benzyl)carbamoyl)-2-(6-(bis(methyl- $d_3$ )amino)-3-(bis(methyl- $d_3$ )iminio)-3*H*-xanthen-9-yl)benzoate (BG-TMR-d12)

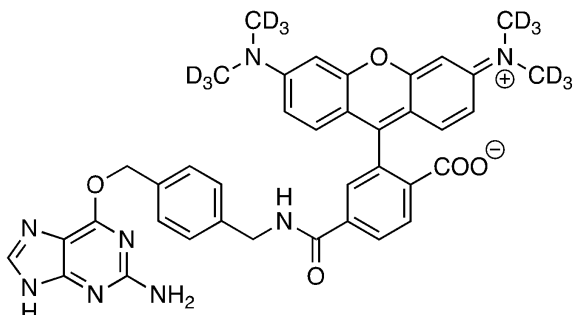

BG-TMR-d12 was prepared according to general procedure A.

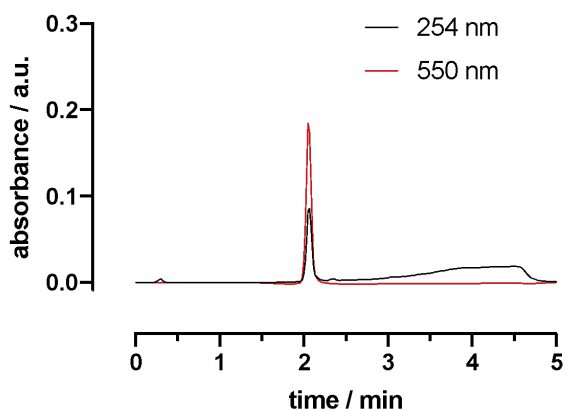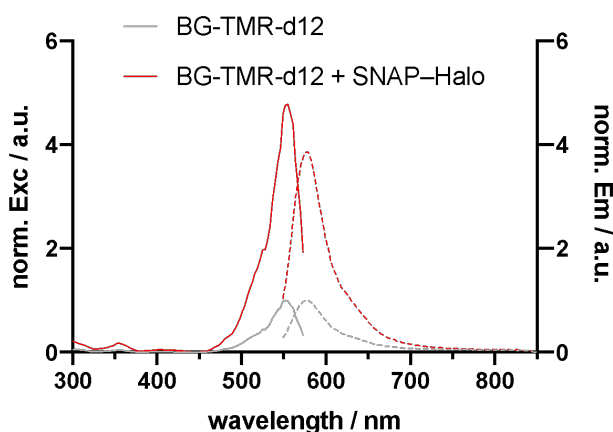

$^1\text{H}$  NMR (600 MHz, MeOD):  $\delta$  [ppm] = 8.41 (d,  $J$  = 8.3 Hz, 1H), 8.22 (d,  $J$  = 8.3, 1H), 8.20 (s, 1H), 7.85 (s, 1H), 7.51 (d,  $J$  = 7.9, 2H), 7.40 (d,  $J$  = 7.9 Hz, 2H), 7.14 (d,  $J$  = 9.5 Hz, 2H), 7.04 (dd,  $J$  = 9.5, 2.2 Hz, 2H), 6.98 (d,  $J$  = 2.2 Hz, 2H) 5.60 (s, 2H), 4.60 (s, 2H).

$^{13}\text{C}$  NMR (150 MHz, MeOD):  $\delta$  [ppm] = 167.8, 167.3, 161.1, 160.5, 159.1, 159.0, 154.4, 142.5, 140.4, 139.2, 135.9, 135.6, 135.0, 132.8, 132.0, 130.3, 130.0, 129.9, 128.9, 115.5, 114.8, 97.3, 70.2, 44.4. Two carbon signals missing.

HRMS (ESI): calc. for  $\text{C}_{38}\text{H}_{24}\text{D}_{12}\text{N}_8\text{O}_5$   $[\text{M}+2\text{H}]^{2+}$ : 348.1776, found: 348.1770.

**2.4. 2-(6-(Bis(methyl-d<sub>3</sub>)amino)-3-(bis(methyl-d<sub>3</sub>)iminio)-3*H*-xanthen-9-yl)-4-((2-(2-((6-chlorohexyl)oxy)ethoxy)ethyl)carbamoyl)benzoate (CA-TMR-d12)**

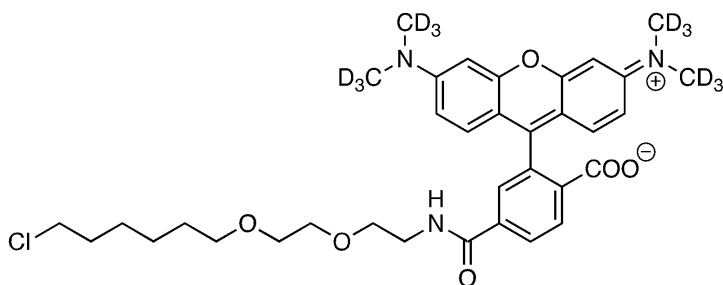

CA-TMR-d12 was prepared according to general procedure A.

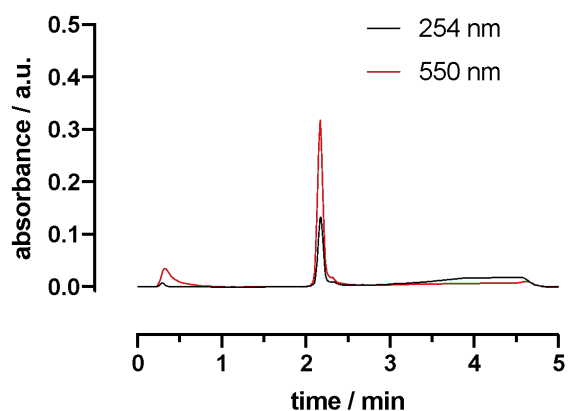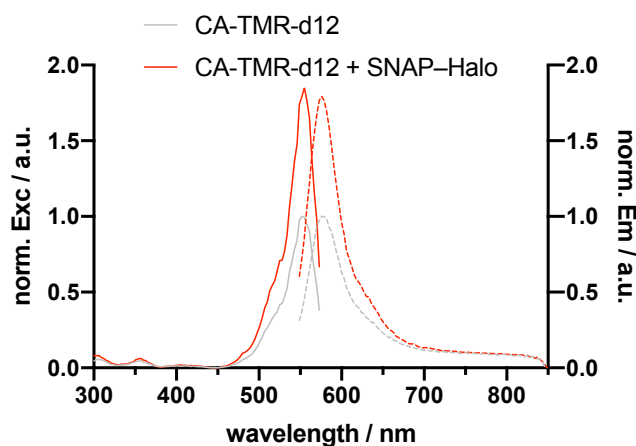

<sup>1</sup>H NMR (600 MHz, MeOD-d<sub>4</sub>):  $\delta$  [ppm] = 8.79 (t,  $J$  = 5.1 Hz, 1H), 8.41 (d,  $J$  = 8.2 Hz, 1H) 8.22 (dd,  $J$  = 8.3, 1.6 Hz, 1H), 7.83 (d,  $J$  = 1.4 Hz, 1H), 7.16 (d,  $J$  = 9.5 Hz, 2H) 7.06 (dd,  $J$  = 9.5, 2.4 Hz, 2H), 6.98 (d,  $J$  = 2.4 Hz, 2H), 3.66 (t,  $J$  = 5.3 Hz, 2H), 3.64–3.58 (m, 4H) 3.55 (m, 2H), 3.53 (t,  $J$  = 6.63 Hz, 2H), 3.43 (t,  $J$  = 6.5 Hz, 2H), 1.71 (quint,  $J$  = 7.1 Hz, 2H), 1.50 (quint,  $J$  = 7.0 Hz, 2H) 1.40 (quint,  $J$  = 7.5 Hz, 2H), 1.32 (quint,  $J$  = 5.1 Hz, 2H).

<sup>13</sup>C NMR (150 MHz, MeOD-d<sub>4</sub>):  $\delta$  [ppm] = 168.0, 167.3, 160.6, 159.1, 159.1, 139.4, 135.5, 134.8, 132.8, 132.1, 130.3, 130.1, 115.5, 114.9, 97.4, 72.1, 71.2, 71.2, 70.4, 45.7, 41.2, 33.7, 30.5, 27.7, 26.4.

HRMS (ESI): calc. for C<sub>35</sub>H<sub>31</sub>D<sub>12</sub>ClN<sub>3</sub>O<sub>6</sub> [M+H]<sup>+</sup>: 648.3588, found: 648.3587.



**2.5. 3,7-Bis(bis(methyl-d<sub>3</sub>)amino)-5,5-dimethyl-3'-oxo-3'*H*,5*H*-spiro[dibenzo[*b,e*]siline-10,1'-isobenzofuran]-6'-carboxylic acid (4)**

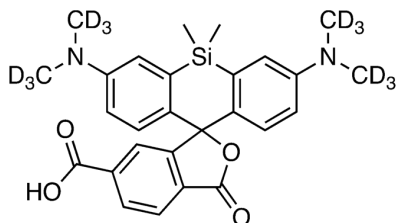

A Schlenk flask was charged under an argon atmosphere with 50.0 mg (67.7  $\mu\text{mol}$ , 1.0 equiv.) of *tert*-butyl 5,5-dimethyl-3'-oxo-3,7-bis(((trifluoromethyl)sulfonyl)oxy)-3'*H*,5*H*-spiro[dibenzo[*b,e*]siline-10,1'-isobenzofuran]-6'-carboxylate<sup>2</sup> (**3**), 12.4 mg (13.5  $\mu\text{mol}$ , 0.2 equiv.) of tris(dibenzylideneacetone)dipalladium(0) ( $\text{Pd}_2\text{dba}_3$ ), 9.7 mg (20.3  $\mu\text{mol}$ , 0.3 equiv.) of 2-(dicyclohexylphosphino)-2',4',6'-triisopropylbiphenyl (XPhos), 106 mg (325  $\mu\text{mol}$ , 4.8 equiv.) of  $\text{Cs}_2\text{CO}_3$  and 17.8 mg (203  $\mu\text{mol}$ , 3.0 equiv.) of  $(\text{D}_3\text{C})_2\text{NH} \times \text{HCl}$ , before 2 mL of dry 1,4-dioxane were added via syringe. The reaction mixture was heated to 100 °C over night before it was cooled to room temperature and all volatiles were removed *in vacuo*. 10% TFA in DCM was added to the crude and the deprotection step was allowed to incubate at r.t. over 4 hours. After removal of all volatiles and reuptake of the crude in  $\text{MeCN}:\text{H}_2\text{O} = 1:1$ , HPLC ( $\text{MeCN}:\text{H}_2\text{O}+0.1\%$  TFA = 10:90 to 90:10 over 60 minutes) provided 8.2 mg (16.9  $\mu\text{mol}$ ) of the desired compound as a purple-blue powder in 25% yield.

<sup>1</sup>H NMR (600 MHz,  $\text{MeOD-d}_4$ ):  $\delta$  [ppm] = 8.34 (m, 2H), 7.83 (s, 1H), 7.35 (d,  $J = 2.75$ , 2H), 6.96 (d,  $J = 9.5$  Hz, 2H), 6.77 (dd,  $J = 9.5, 2.4$  Hz, 2H), 0.66 (s, 3H), 0.58 (s, 3H).

<sup>13</sup>C NMR (150 MHz,  $\text{MeOD-d}_4$ ):  $\delta$  [ppm] = 168.1, 168.0, 154.8, 147.7, 144.3, 140.0, 135.6, 135.2, 131.7, 131.6, 131.1, 130.0, 121.5, 115.3, -0.7, -1.8. One carbon signal missing.

HRMS (ESI): calc. for  $\text{C}_{27}\text{H}_{17}\text{D}_{12}\text{N}_2\text{O}_4\text{Si}$  [ $\text{M}+\text{H}$ ]<sup>+</sup>: 485.2644, found: 485.2645.

**2.6. 4-((4-(((2-Amino-9H-purin-6-yl)oxy)methyl)benzyl)carbamoyl)-2-(7-(bis(methyl-d<sub>3</sub>)amino)-3-(bis(methyl-d<sub>3</sub>)iminio)-5,5-dimethyl-3,5-dihydrodibenzo[*b,e*]silin-10-yl)benzoate (BG-SiR-d12)**

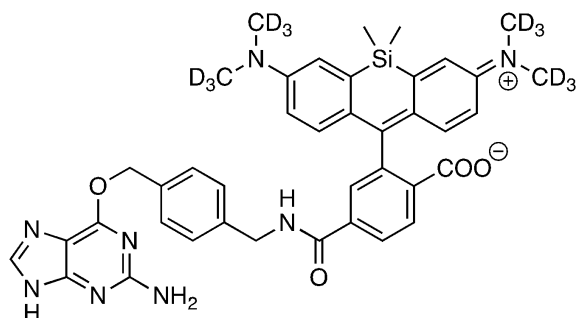

BG-SiR-d12 was prepared according to general procedure A.

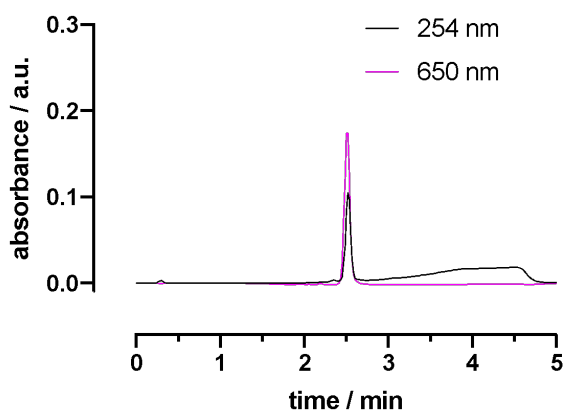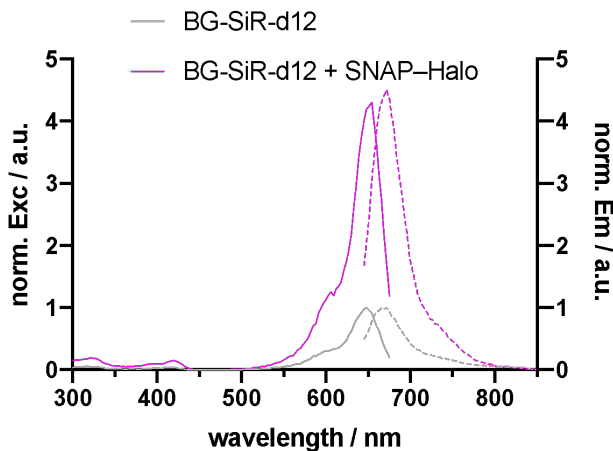

<sup>1</sup>H NMR (600 MHz, MeOD-d<sub>4</sub>):  $\delta$  [ppm] = 8.33 (s, 1H), 8.30 (d,  $J$  = 8.2 Hz, 1H), 8.13 (d,  $J$  = 3.3 Hz, 1H), 7.72 (d,  $J$  = 1.1 Hz, 1H), 7.74 (d,  $J$  = 1.4 Hz, 1H), 7.50 (d,  $J$  = 8.0 Hz, 2H), 7.32 (d,  $J$  = 2.8 Hz, 2H), 6.95 (d,  $J$  = 9.5 Hz, 2H), 6.73 (dd,  $J$  = 9.5, 2.8 Hz, 2H), 5.62 (s, 2H), 4.58 (s, 2H), 0.64 (s, 3H), 0.58 (s, 3H).

<sup>13</sup>C NMR (150 MHz, MeOD-d<sub>4</sub>):  $\delta$  [ppm] = 168.1, 167.9, 161.1, 158.0, 154.9, 153.4, 148.2, 144.1, 143.8, 140.7, 138.9, 135.4, 134.3, 131.9, 130.2, 129.9, 129.8, 129.0, 128.9, 121.5, 118.6, 116.7, 115.2, 70.9, 44.5, -0.8, -1.7. One carbon signal missing.

HRMS (ESI): calc. for C<sub>40</sub>H<sub>30</sub>D<sub>12</sub>N<sub>8</sub>O<sub>4</sub>Si [M+2H]<sup>2+</sup>: 369.1920, found: 369.1917.

**2.7. 2-(7-(Bis(methyl-d<sub>3</sub>)amino)-3-(bis(methyl-d<sub>3</sub>)iminio)-5,5-dimethyl-3,5-dihydrodibenzo[*b,e*]silin-10-yl)-4-((2-(2-((6-chlorohexyl)oxy)ethoxy)ethyl)carbamoyl)benzoate (CA-SiR-d12)**

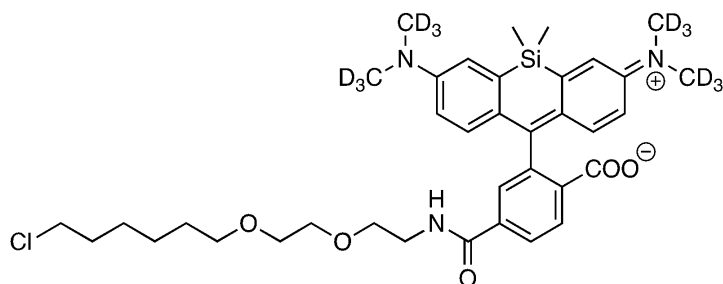

CA-SiR-d12 was prepared according to general procedure A.

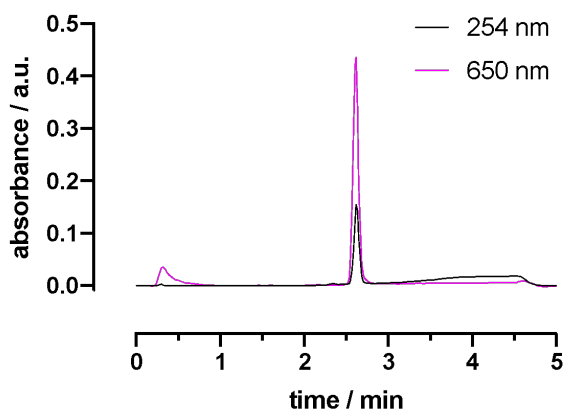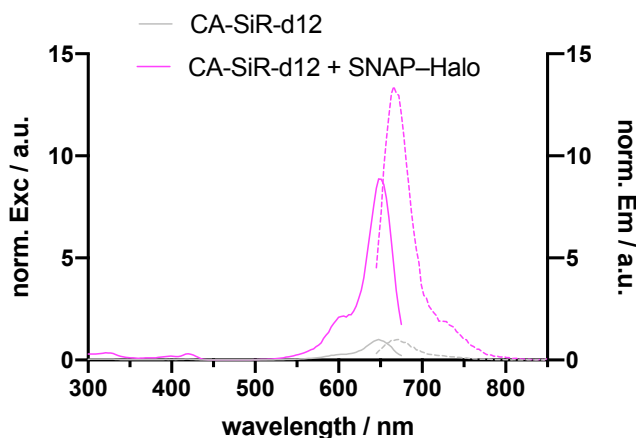

<sup>1</sup>H NMR (600 MHz, MeOD-d<sub>4</sub>):  $\delta$  [ppm] = 8.13 (d,  $J$  = 7.9 Hz, 1H), 8.12 (d,  $J$  = 8.2 Hz, 1H), 7.72 (s, 1H), 7.32 (d,  $J$  = 2.6 Hz, 2H), 6.98 (d,  $J$  = 9.5 Hz, 2), 6.75 (dd,  $J$  = 9.5, 2.4 Hz, 2H), 3.65 (t,  $J$  = 5.3 Hz, 2H), 3.63–3.60 (m, 2H), 3.60–3.54 (m, 4H), 3.51 (t,  $J$  = 6.6 Hz, 2H), 3.43 (t,  $J$  = 6.5 Hz, 2H), 1.71 (quint,  $J$  = 7.0 Hz, 2H), 1.51 (quint,  $J$  = 7.0 Hz, 2H), 1.40 (quint,  $J$  = 7.5 Hz, 2H), 1.32 (quint,  $J$  = 8.1 Hz, 2H), 0.64 (s, 3H), 0.59 (s, 3H).

<sup>13</sup>C NMR (150 MHz, MeOD-d<sub>4</sub>):  $\delta$  [ppm] = 168.1, 167.8, 155.1, 148.5, 140.9, 139.0, 134.4, 132.0, 129.8, 121.5, 115.1, 72.1, 71.1, 70.4, 45.7, 41.1, 33.7, 30.7, 30.4, 27.6, 26.4, -0.88, -1.68. Four carbon signals missing.

HRMS (ESI): calc. for C<sub>37</sub>H<sub>37</sub>D<sub>12</sub>ClN<sub>3</sub>O<sub>5</sub>Si [M+H]<sup>+</sup>: 690.3878, found: 690.3874.

**2.8. 2-(6-(Bis(methyl-d<sub>3</sub>)amino)-3-(bis(methyl-d<sub>3</sub>)iminio)-3*H*-xanthen-9-yl)-4-((2-(2,5-dioxo-2,5-dihydro-1*H*-pyrrol-1-yl)ethyl)carbamoyl)benzoate (Mal-TMR-d12)**

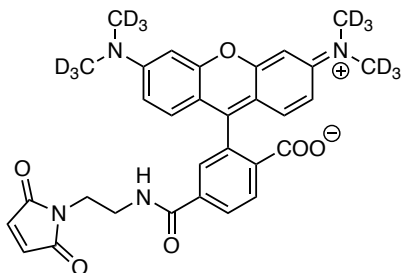

**Mal-TMR-d12** was prepared according to general procedure A.

**<sup>1</sup>H NMR** (600 MHz, DMSO-d<sub>6</sub>):  $\delta$  [ppm] = 8.79 (t,  $J$  = 4.8 Hz, 1H), 8.50 (br s, 1H), 8.05–8.03 (m, 2H), 7.51 (s, 1H), 6.95 (s, 1H), 6.52–6.48 (m, 6H), 3.52 (t,  $J$  = 4.9 Hz, 2H), 3.35–3.32 (m, 2H).

**<sup>13</sup>C NMR** (150 MHz, DMSO-d<sub>6</sub>):  $\delta$  [ppm] = 170.9, 168.1, 165.0, 152.8, 152.1, 152.0, 140.4, 134.5, 128.9, 128.4, 124.7, 122.3, 116.4, 109.0, 105.5, 97.9, 84.7, 37.8, 36.9.

**HRMS** (ESI): calc. for C<sub>31</sub>H<sub>17</sub>D<sub>12</sub>N<sub>4</sub>O<sub>6</sub> [M+H]<sup>+</sup>: 565.2835, found: 565.2879.

**2.9. 2-(7-(Bis(methyl-d<sub>3</sub>)amino)-3-(bis(methyl-d<sub>3</sub>)iminio)-5,5-dimethyl-3,5-dihydrodibenzo[b,e]silin-10-yl)-4-((2-(2,5-dioxo-2,5-dihydro-1*H*-pyrrol-1-yl)ethyl)carbamoyl)benzoate (Mal-SiR-d12)**

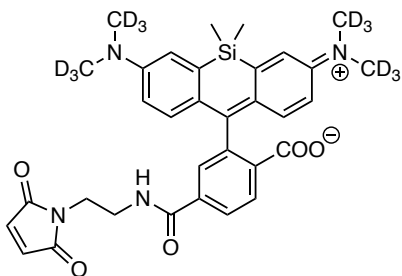

**Mal-SiR-d12** was prepared according to general procedure A.

**<sup>1</sup>H NMR** (600 MHz, DMSO-d<sub>6</sub>):  $\delta$  [ppm] = 8.91 (t,  $J$  = 5.6 Hz, 0.5H), 8.82 (t,  $J$  = 6.0 Hz, 0.7H), 8.09–8.04 (m, 1.2 H), 7.96 (d,  $J$  = 8.0 Hz, 0.6H), 7.68 (s, 0.4H), 7.58 (s, 0.6H), 7.09 (br s, 1.5H), 6.96 (s, 0.7H), 6.71–6.65 (m, 3.0H), 3.56–3.50 (m, 2.1H), 3.37 (q,  $J$  = 5.7 Hz, 1.3H), 2.86 (q,  $J$  = 7.3 Hz, 1.8H), 2.58 (t,  $J$  = 7.0 Hz, 0.9H), 0.64 (s, 3H), 0.53–0.52 (m, 3H). Two isomers.

**<sup>13</sup>C NMR** (150 MHz, DMSO-d<sub>6</sub>):  $\delta$  [ppm] = 172.6, 171.0, 165.2, 164.9, 158.5, 158.3, 158.1, 157.8, 149.3, 139.6, 134.5, 130.6, 128.2, 128.0, 125.6, 122.7, 114.6, 113.9, 38.8, 37.8, 36.9, 36.7, 33.6, 33.0, -0.1, -1.3, -1.4. Two isomers, some carbons missing.

**HRMS** (ESI): calc. for C<sub>31</sub>H<sub>22</sub>D<sub>12</sub>N<sub>4</sub>O<sub>5</sub>Si [M+H]<sup>+</sup>: 607.3124, found: 607.3192.

## 2.10. LUXendin651-d12

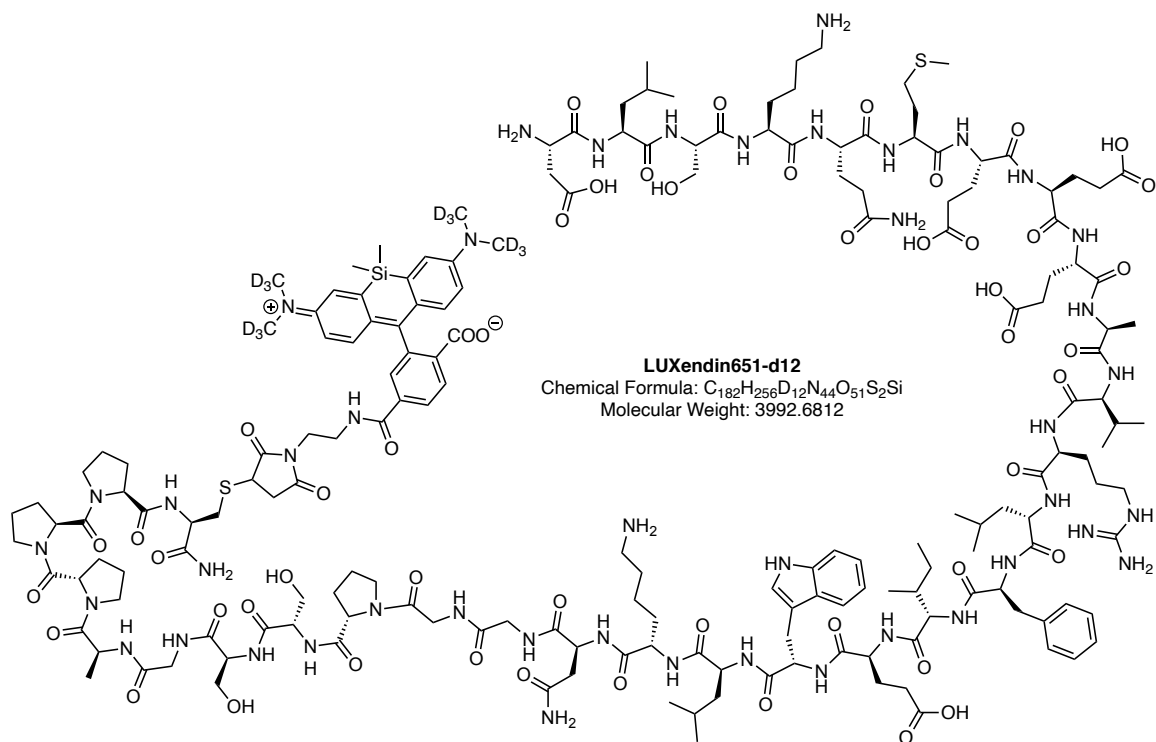

**LUXendin651-d12** was prepared as described previously by using Mal-SiR-d<sub>12</sub> instead of Mal-SiR.<sup>3</sup> Briefly, 400 nmol Ex4(9-39)\_S39C obtained from solid-phase peptide synthesis<sup>3</sup> was incubated with 500 nmol SiR-d<sub>12</sub>-Mal in PBS and allowed to incubate at room temperature o.n. before the reaction was submitted to RP-HPLC to obtain 75 nmol of LUXendin651-d12 in 19% yield. LCMS trace is shown in Supporting Figure 2.

**MS (ESI):** calc. for C<sub>182</sub>H<sub>259</sub>D<sub>12</sub>N<sub>44</sub>O<sub>51</sub>S<sub>2</sub>Si [M+3H]<sup>3+</sup>: 1331.3315, found: 1331.9871.

## 2.11. 7-(Dimethylamino)-4-methyl-2H-chromen-2-one (Coumarin 461)

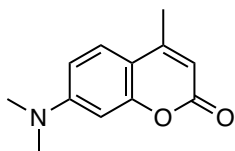

Preparative RP-HPLC provided the desired compound as a faint yellow powder after lyophilization.

**<sup>1</sup>H NMR** (600 MHz, DMSO-d<sub>6</sub>): δ [ppm] = 7.52 (d, *J* = 8.9 Hz, 1H), 6.73 (dd, *J* = 8.9, 2.5 Hz, 1H), 6.53 (d, *J* = 2.5 Hz, 1H), 5.96 (d, *J* = 0.8 Hz, 1H), 3.02 (s, 3H), 2.34 (d, *J* = 0.8 Hz, 3H).

**<sup>13</sup>C NMR** (150 MHz, DMSO-d<sub>6</sub>): δ [ppm] = 161.1, 155.7, 154.0, 153.3, 126.4, 109.4, 109.2, 108.6, 97.9, 40.2, 18.4.

**HRMS (ESI):** calc. for C<sub>12</sub>H<sub>14</sub>NO<sub>2</sub> [M+H]<sup>+</sup>: 204.1019, found: 204.1018.

## 2.12. 4-Methyl-7-((methyl-d3)amino)-2H-chromen-2-one (6)

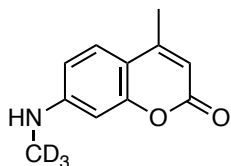

A round bottom flask was charged with 65.0 mg (371  $\mu\text{mol}$ , 1.0 equiv.) of 7-amino-4-methyl-2H-chromen-2-one (**5**) and dissolved in 3 mL of MeCN before 102 mg (742.0  $\mu\text{mol}$ , 2.0 equiv.) of  $\text{K}_2\text{CO}_3$  and 135 mg (928  $\mu\text{mol}$ , 57.8  $\mu\text{L}$ , 2.5 equiv.) iodomethane- $\text{d}_3$  were added. The reaction mixture was heated to 80  $^\circ\text{C}$  for 3 h before it was cooled to room temperature and all volatiles were removed *in vacuo*. HPLC (MeCN:H<sub>2</sub>O+0.1% TFA = 10:90 to 90:10 over 60 minutes) provided 12.5 mg (65.1  $\mu\text{mol}$ ) of the desired compound as a beige powdered side product in 18% yield. The  $\text{d}_6$  congener was isolated in 27% yield (*vide infra*).

$^1\text{H NMR}$  (600 MHz, DMSO- $\text{d}_6$ ):  $\delta$  [ppm] = 7.44 (d,  $J$  = 8.7 Hz, 1H), 6.63 (s, 1H), 6.58 (dd,  $J$  = 8.7, 2.3 Hz, 1H), 6.35 (d,  $J$  = 2.3 Hz, 1H), 5.91 (d,  $J$  = 0.9 Hz, 1H), 2.31 (d,  $J$  = 0.8 Hz, 3H).

$^{13}\text{C NMR}$  (150 MHz, DMSO- $\text{d}_6$ ):  $\delta$  [ppm] = 161.2, 156.2, 154.2, 153.9, 126.3, 110.5, 109.1, 107.8, 96.3, 18.5.

**HRMS** (ESI): calc. for  $\text{C}_{11}\text{H}_9\text{D}_3\text{NO}_2$   $[\text{M}+\text{H}]^+$ : 193.1051, found: 193.1051.

## 2.13. 4-Methyl-7-(methyl(methyl-d3)amino)-2H-chromen-2-one (Coumarin 461-d3)

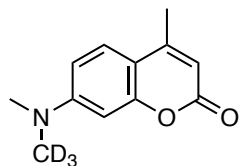

A round bottom flask was charged with 12.0 mg (62.5  $\mu\text{mol}$ , 1.0 equiv.) of 4-Methyl-7-((methyl-d3)amino)-2H-chromen-2-one (**6**) and dissolved in 3 mL of MeCN before 100 mg (725.0  $\mu\text{mol}$ , 11.6 equiv.) of  $\text{K}_2\text{CO}_3$  and 135 mg (2.4 mmol, 150  $\mu\text{L}$ , 38 equiv.) iodomethane were added. The reaction mixture was heated to 80  $^\circ\text{C}$  for 12 h before it was cooled to room temperature and all volatiles were removed *in vacuo*. HPLC (MeCN:H<sub>2</sub>O+0.1% TFA = 10:90 to 90:10 over 60 minutes) provided 10.0 mg (48.3  $\mu\text{mol}$ ) of the desired compound as a beige powdered side product in 77% yield.

$^1\text{H NMR}$  (600 MHz, DMSO- $\text{d}_6$ ):  $\delta$  [ppm] = 7.52 (d,  $J$  = 8.9 Hz, 1H), 6.72 (dd,  $J$  = 8.9, 2.6 Hz, 1H), 6.53 (d,  $J$  = 2.6 Hz, 1H), 5.96 (d,  $J$  = 1.1 Hz, 1H), 3.01 (s, 3H), 2.33 (d,  $J$  = 1.1 Hz, 3H).

$^{13}\text{C NMR}$  (150 MHz, DMSO- $\text{d}_6$ ):  $\delta$  [ppm] = 161.2, 155.7, 154.1, 153.4, 126.4, 109.4, 109.2, 108.6, 97.8, 18.4. One carbon masked by DMSO- $\text{d}_6$ .

**HRMS** (ESI): calc. for  $\text{C}_{12}\text{H}_{11}\text{D}_3\text{NO}_2$   $[\text{M}+\text{H}]^+$ : 207.1207, found: 207.1205.

## 2.14. 7-(Bis(methyl-d3)amino)-4-methyl-2H-chromen-2-one (Coumarin 461-d6)

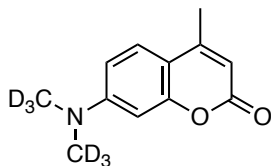

A round bottom flask was charged with 65.0 mg (371  $\mu\text{mol}$ , 1.0 equiv.) of 7-amino-4-methyl-2H-chromen-2-one (**5**) and dissolved in 3 mL of MeCN before 102 mg (742.0  $\mu\text{mol}$ , 2.0 equiv.) of  $\text{K}_2\text{CO}_3$  and 135 mg (928  $\mu\text{mol}$ , 57.8  $\mu\text{L}$  2.5 equiv.) iodomethane- $\text{d}_3$  were added. The reaction mixture was heated to 80  $^\circ\text{C}$  for 3 h before it was cooled to room temperature and all volatiles were removed *in vacuo*. HPLC (MeCN:H<sub>2</sub>O+0.1% TFA = 10:90 to 90:10 over 60 minutes) provided 21.2 mg (101.4  $\mu\text{mol}$ ) of the desired compound as a beige powder in 27% yield.

**<sup>1</sup>H NMR** (600 MHz, DMSO- $\text{d}_6$ ):  $\delta$  [ppm] = 7.52 (d,  $J$  = 8.9 Hz, 1H), 6.72 (dd,  $J$  = 8.9, 2.6 Hz, 1H), 6.53 (d,  $J$  = 2.5 Hz, 1H), 5.96 (d,  $J$  = 1.1 Hz, 1H), 2.33 (d,  $J$  = 1.1 Hz, 3H).

**<sup>13</sup>C NMR** (150 MHz, DMSO- $\text{d}_6$ ):  $\delta$  [ppm] = 161.2, 155.7, 154.0, 153.4, 126.3, 109.4, 108.5, 97.8, 18.4.

**HRMS** (ESI): calc. for  $\text{C}_{12}\text{H}_8\text{D}_6\text{NO}_2$  [ $\text{M}+\text{H}$ ]<sup>+</sup>: 210.1394, found: 210.1396.

## 2.15. N,N-Dimethyl-7-nitrobenzo[c][1,2,5]oxadiazol-4-amine (NBD)

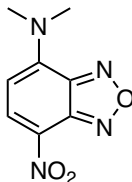

A round bottom flask was charged with 30.0 mg (150.3  $\mu\text{mol}$ , 1.0 equiv.) of 4-chloro-7-nitro-2,1,3-benzoxadiazole (**7**) and dissolved in 3 mL of anhydrous EtOH before 24.3 mg (301  $\mu\text{mol}$ , 2.0 equiv.) dimethylamine hydrochloride and 60  $\mu\text{L}$  triethylamine (431  $\mu\text{mol}$ , 3.0 equiv.) were added. The reaction mixture was stirred for 4 h before all volatiles were removed *in vacuo*. HPLC (MeCN:H<sub>2</sub>O+0.1% TFA = 10:90 to 90:10 over 60 minutes) provided 18.6 mg (89.4  $\mu\text{mol}$ ) of the desired compound as a bright orange powder in 59% yield. Crystals suitable for X-ray crystallography were obtained as fine needles by allowing a 5 mg/mL solution in DMSO stand open to the atmosphere for one week.

**<sup>1</sup>H NMR** (600 MHz, DMSO- $\text{d}_6$ ):  $\delta$  [ppm] = 8.46 (d,  $J$  = 9.2 Hz, 1H), 6.36 (d,  $J$  = 9.2 Hz, 1H), 3.60 (br s, 6H).

**<sup>13</sup>C NMR** (150 MHz, DMSO- $\text{d}_6$ ):  $\delta$  [ppm] = 146.6, 144.9, 144.8, 136.2, 119.7, 102.2, 43.5 (br).

**HRMS** (ESI): calc. for  $\text{C}_8\text{H}_9\text{N}_4\text{O}_3$  [ $\text{M}+\text{H}$ ]<sup>+</sup>: 209.0669, found: 209.0673.

2.16. *N,N*-Bis(methyl-d<sub>3</sub>)-7-nitrobenzo[*c*][1,2,5]oxadiazol-4-amine (NBD-d<sub>6</sub>)

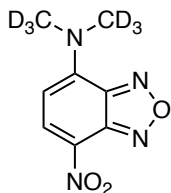

A round bottom flask was charged with 30.0 mg (150.3  $\mu\text{mol}$ , 1.0 equiv.) of 4-chloro-7-nitro-2,1,3-benzoxadiazole (**7**) and dissolved in 3 mL of anhydrous EtOH before 26.3 mg (301  $\mu\text{mol}$ , 2.0 equiv.) dimethyl-d<sub>6</sub>-amine hydrochloride and 60  $\mu\text{L}$  triethylamine (431  $\mu\text{mol}$ , 3.0 equiv.) were added. The reaction mixture was stirred for 4 h before all volatiles were removed *in vacuo*. HPLC (MeCN:H<sub>2</sub>O+0.1% TFA = 10:90 to 90:10 over 60 minutes) provided 29.2 mg (136.4  $\mu\text{mol}$ ) of the desired compound as a bright orange powder in 91% yield. Crystals suitable for X-ray crystallography were obtained as fine needles by allowing a 5 mg/mL solution in DMSO stand open to the atmosphere for one week.

<sup>1</sup>H NMR (600 MHz, DMSO-d<sub>6</sub>):  $\delta$  [ppm] = 8.46 (d,  $J$  = 9.2 Hz, 1H), 6.36 (d,  $J$  = 9.2 Hz, 1H).

<sup>13</sup>C NMR (150 MHz, DMSO-d<sub>6</sub>):  $\delta$  [ppm] = 147.2, 145.3, 145.3, 136.7, 120.2, 102.6.

HRMS (ESI): calc. for C<sub>8</sub>H<sub>3</sub>D<sub>6</sub>N<sub>4</sub>O<sub>3</sub> [M+H]<sup>+</sup>: 215.1046, found: 215.1046.

2.17. 3,7-Bis(dimethylamino)phenothiazin-5-ium (Methylene Blue)

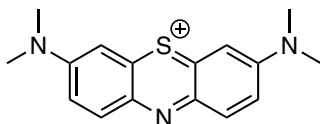

Preparative RP-HPLC provided the desired compound as a blue powder after lyophilization.

<sup>1</sup>H NMR (600 MHz, DMSO-d<sub>6</sub>):  $\delta$  [ppm] = 7.92 (d,  $J$  = 9.2 Hz, 2H), 7.51–7.48 (m, 4H), 3.37 (s, 12H).

<sup>13</sup>C NMR (150 MHz, DMSO-d<sub>6</sub>):  $\delta$  [ppm] = 153.9, 137.8, 135.0, 133.5, 119.0, 106.8, 41.0.

HRMS (ESI): calc. for C<sub>16</sub>H<sub>18</sub>N<sub>3</sub>S [M]<sup>+</sup>: 296.1969, found: 296.1972.



**2.18. 3,7-Bis(bis(methyl-d3)amino)phenothiazin-5-ium (Methylene Blue-d12)**

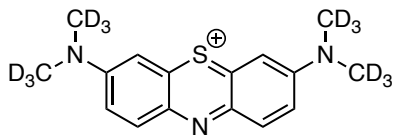

A round bottom flask was charged with 20 mg (69.6  $\mu\text{mol}$ , 1.0 equiv.) of thionine acetate (**8**) and dissolved in 5 mL of MeCN before 96 mg (696  $\mu\text{mol}$ , 10.0 equiv.) of  $\text{K}_2\text{CO}_3$  and 101 mg (696  $\mu\text{mol}$ , 44.3  $\mu\text{L}$ , 10.0 equiv.) iodomethane- $\text{d}_3$  were added. The reaction mixture was heated to 80  $^\circ\text{C}$  for 3 h before it was cooled to room temperature and all volatiles were removed *in vacuo*. Preparative RP-HPLC provided 14 mg (34.2  $\mu\text{mol}$  as TFA salt) of the desired compound as a blue powder after lyophilization in 49% yield.

$^1\text{H NMR}$  (600 MHz,  $\text{DMSO-}d_6$ ):  $\delta$  [ppm] = 7.86 (d,  $J = 9.0$  Hz, 2H), 7.45–7.42 (m, 4H).

$^{13}\text{C NMR}$  (150 MHz,  $\text{DMSO-}d_6$ ):  $\delta$  [ppm] = 154.0, 137.9, 135.0, 133.6, 119.0, 106.7.

**HRMS** (ESI): calc. for  $\text{C}_{16}\text{H}_6\text{D}_{12}\text{N}_3\text{S}$  [ $\text{M}$ ] $^+$ : 284.1216, found: 284.1216.

### 3. NMR spectra

#### 3.1. 2-(6-(Bis(methyl-d<sub>3</sub>)amino)-3-(bis(methyl-d<sub>3</sub>)iminio)-3*H*-xanthen-9-yl)-4-carboxybenzoate (2)

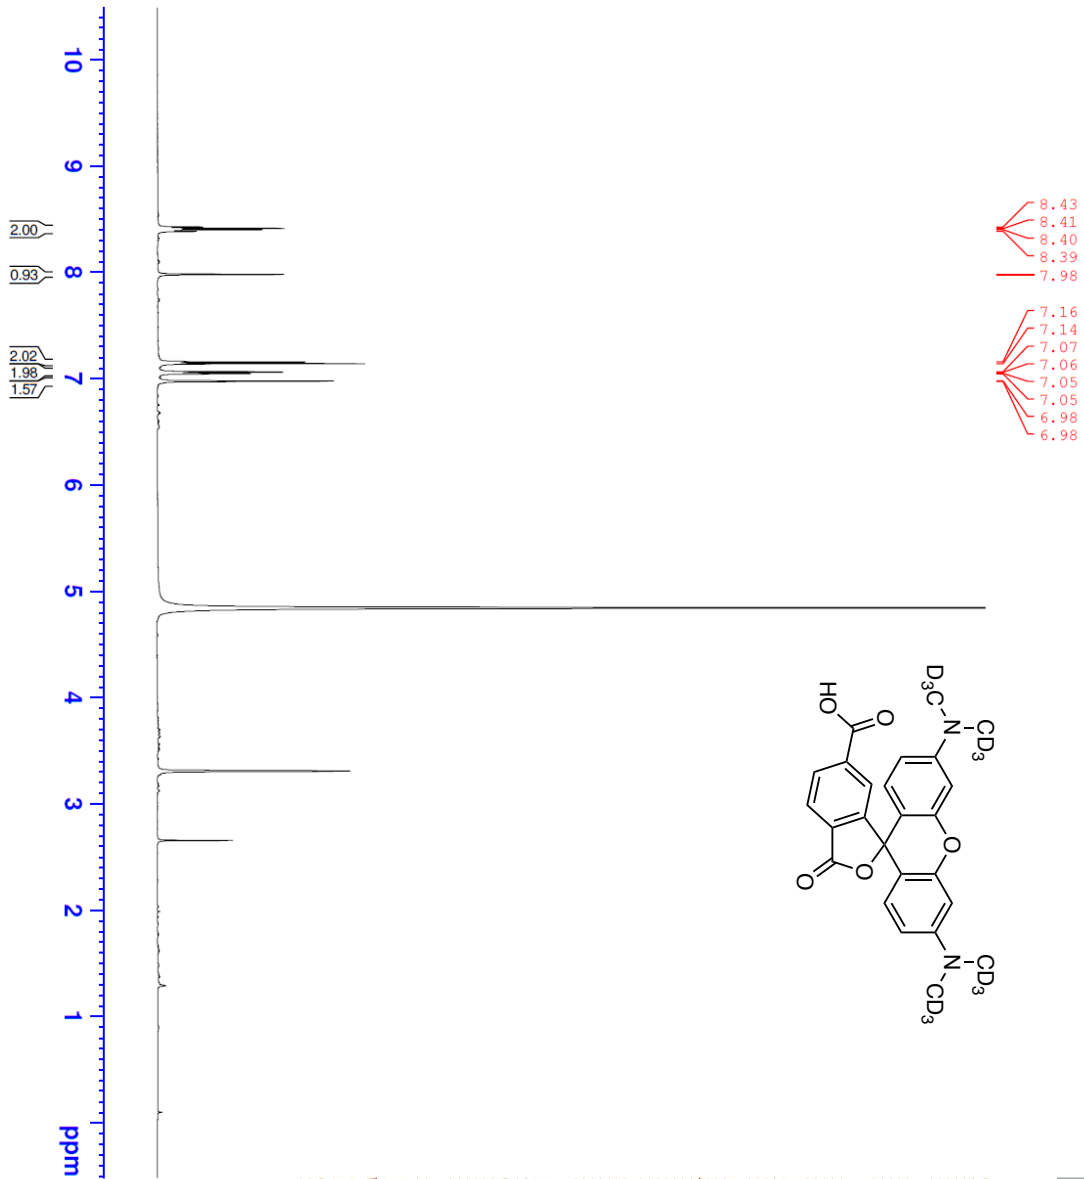

8.43  
8.41  
8.40  
8.39  
7.98  
7.16  
7.14  
7.07  
7.06  
7.05  
7.05  
6.98  
6.98

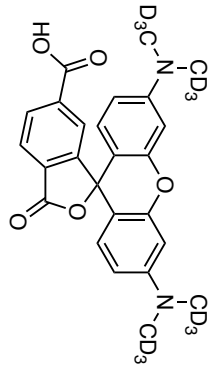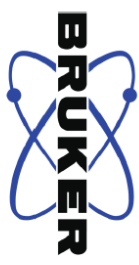

Current Data Parameters  
 NAME KR.TMR-d12-COOH.220309  
 EXPNO 11  
 PROCNO 1

F2 - Acquisition Parameters  
 Date\_ 20220309  
 Time 18.15 h  
 INSTRUM spect  
 PROBRD 2132083\_0005 ( PULPROG MFT1h  
 TD 32768  
 SOLVENT MeOD  
 NS 32  
 DS 2  
 SFO1 10000.000 Hz  
 FIDRES 0.610352 Hz  
 AQ 1.638400 sec  
 RG 6.35  
 DW 50.000 usec  
 DE 6.30 usec  
 TE 300.0 K  
 D1 5.00000000 sec  
 D11 0.03000000 sec  
 D12 0.00002000 sec  
 TD0 1  
 ZGPGTINS  
 SFO1 600.1328200 MHz  
 NUC1 1H  
 NDC1 1.0000000  
 CNST1  
 P0 7.20 usec  
 P1 7.20 usec  
 PLW1 10.00000000 W

F2 - Processing Parameters  
 SI 32768  
 SF 600.1300113 MHz  
 WDW EM  
 SSB 0  
 LB 1.00 Hz  
 GB 0  
 PC 1.00

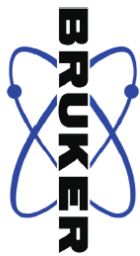

Current Data Parameters  
 NAME KR-TMR-Q12-COQH, 220309  
 EXPRNO 12  
 PROCNO 1

F2 - Acquisition Parameters

Date\_ 20220310  
 Time 0.12 h  
 INSTRUM spect  
 PROBHD Z132083\_0005 ( MPheteroid  
 PULPROG 131072  
 TD MeOD  
 SOLVENT 5120  
 NS 4  
 DS 31250.000 Hz  
 SWH 0.476837 Hz  
 FIDRES 2.0971520 sec  
 AQ 2050  
 RG 16.000 usec  
 DW 15.00 usec  
 DE 370.0 K  
 TE 2.00000000 sec  
 D1 0.03000000 sec  
 D11 0.00002000 sec  
 D12 1  
 IDU -Ddc -Dproe  
 ZGPRGNS 150.9175585 MHz  
 SF01 13C  
 NUC1 1.0000000  
 CNST1 12.00 usec  
 P0 100.00000000 W  
 P3 600.1328200 MHz  
 SF02 1H  
 NUC2 CPDPRG11 waltz16  
 PCPPD2 80.00 usec  
 P1M2 10.00000000 W  
 P1M19 0.08100000 W

F2 - Processing parameters

SI 4096  
 SF 150.9025954 MHz  
 MDW EM  
 SSB 0  
 LB 5.00 Hz  
 GB 0  
 PC 1.00

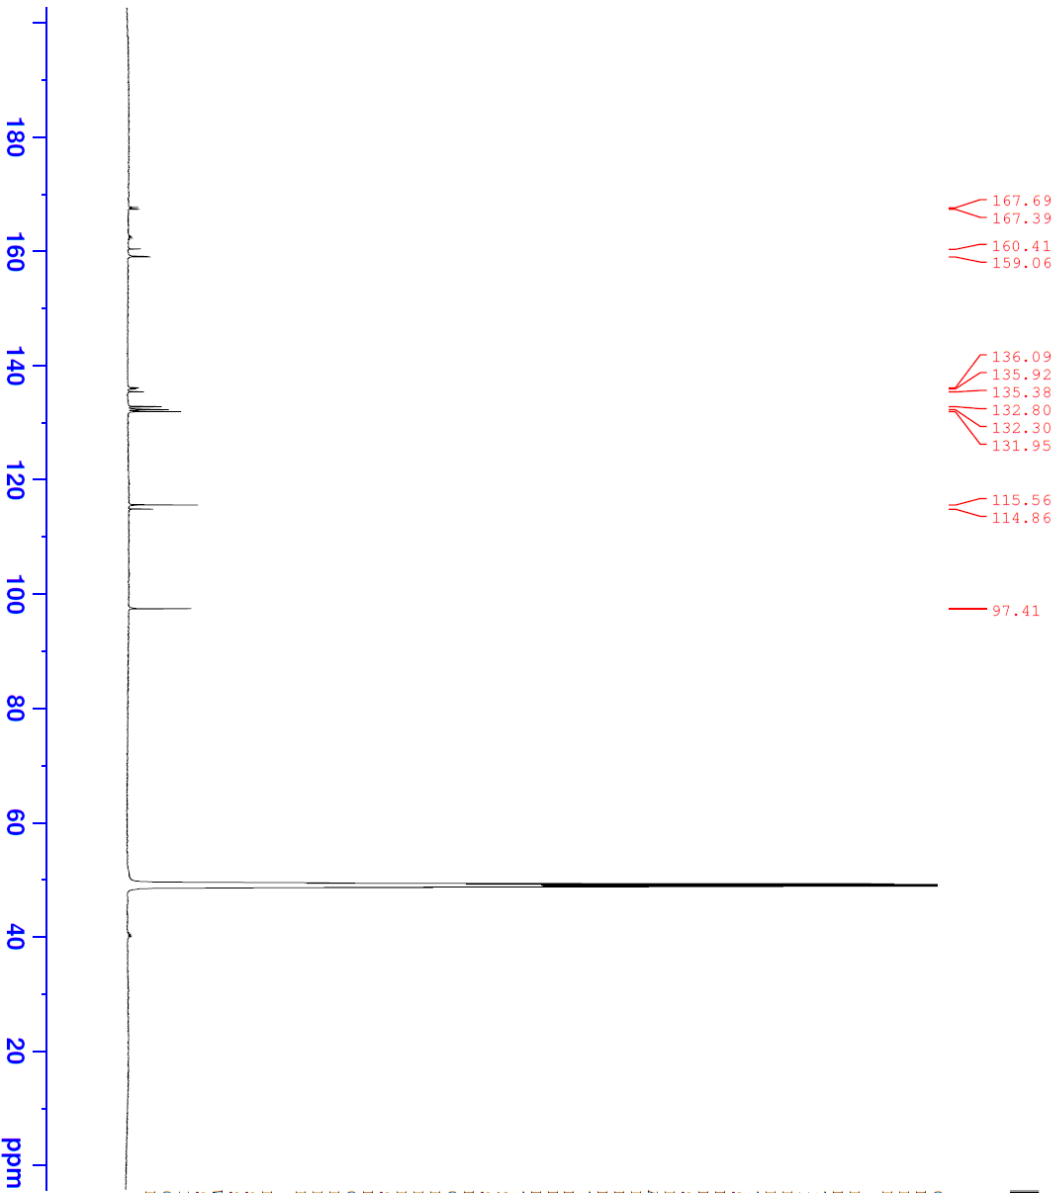

3.2. 4-((4-(((2-Amino-9H-purin-6-yl)oxy)methyl)benzyl)carbamoyl)-2-(6-(bis(methyl-d<sub>3</sub>)amino)-3-(bis(methyl-d<sub>3</sub>)iminio)-3H-xanthen-9-yl)benzoate (BG-TMR-d12)

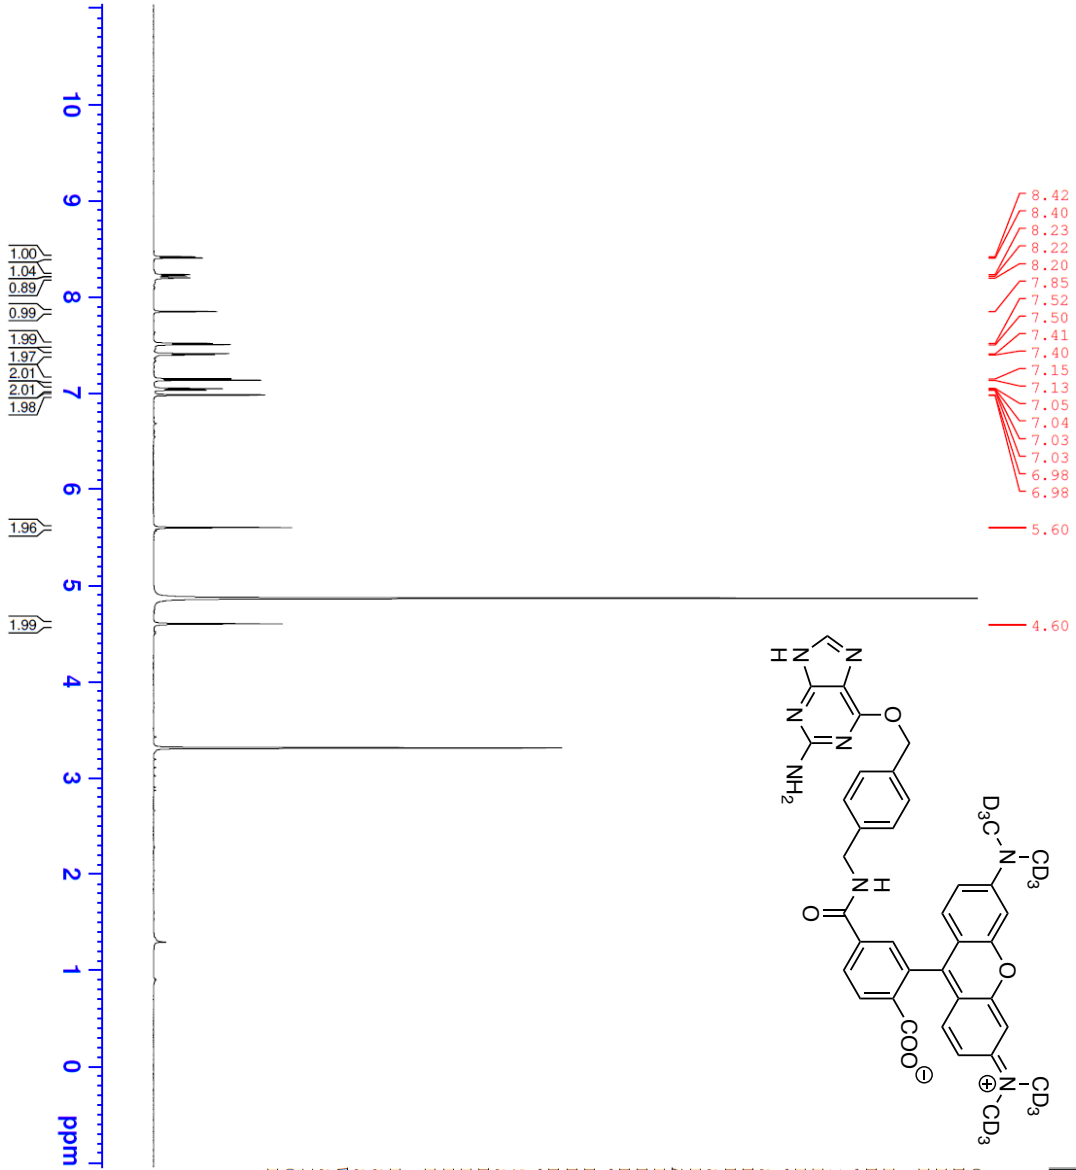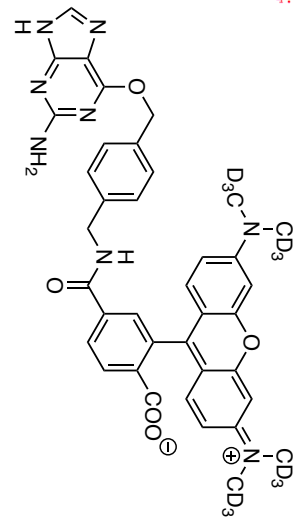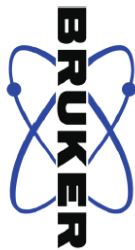

Current Data Parameters  
 NAME KR:Bg-TMR-d12;220321  
 EXPTNO 1  
 PROCNO 1

F2 - Acquisition Parameters  
 Date\_ 20220321  
 Time 15.31 h  
 INSTRUM spect  
 PROBRD 275812\_0039 (C  
 PULPROG zgpg30  
 TD 32768  
 SOLVENT MeOD  
 NS 16  
 DS 2  
 SWH 10000.000 Hz  
 FIDRES 0.610352 Hz  
 AQ 1.6384000 sec  
 RG 32  
 DW 50.000 usec  
 DE 6.50 usec  
 TE 298.1 K  
 D1 18.00000000 sec  
 D11 0.03000000 sec  
 D12 0.00002000 sec  
 TD0 1  
 ZGPGTNS

SFO1 600.1828200 MHz  
 P0 1H  
 NUCL 1H  
 P1 7.38 usec  
 PL 7.38 usec  
 PLWT 10.00000000 W

F2 - Processing parameters  
 SI 131072  
 SF 600.1800122 MHz  
 WDW EM  
 SSB 0  
 LB 1.00 Hz  
 GB 0  
 PC 1.00

167.81  
167.29  
161.13  
160.47  
159.05  
159.00  
154.42  
142.48  
140.39  
139.19  
135.90  
135.56  
134.96  
132.82  
132.00  
130.34  
130.05  
129.90  
128.88  
115.46  
114.79

97.32

70.17

44.44

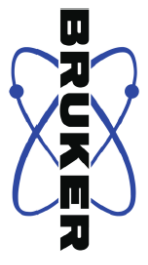

Current Data Parameters  
NAME KR:Bg-TMR-d12:220321  
EXPNO 2  
PROCNO 1

F2 - Acquisition Parameters

Date\_ 20220321  
Time 18:55 h  
INSTRUM spect  
PROBHD 75812.0039 (C  
PULPROG MPEcho1d  
TD 131072  
SOLVENT MeOD  
NS 2048  
DS 2  
SWH 31250.000 Hz  
FIDRES 0.476837 Hz  
AQ 2.0971520 sec  
RG 256  
DM 16.000 usec  
DE 20.00 usec  
TE 298.1 K  
D1 2.0000000 sec  
D11 0.0300000 sec  
D12 0.0002000 sec  
TD0 1  
ZGPTNS -Ddc -Dnoe  
SF01 150.9301310 MHz  
NUC1 13C

P0 11.43 usec  
P3 11.43 usec  
PLM1 120.23000336 W  
SE02 600.1828200 MHz  
NUC2 1H  
PCPD2 waltz16  
PCPD2 80.00 usec  
PLM2 10.00000000 W  
PLM19 0.07620790 W

F2 - Processing parameters

SI 131072  
SE 150.9131787 MHz  
WDW EM  
SSB 0  
GB 0  
PC 1.40

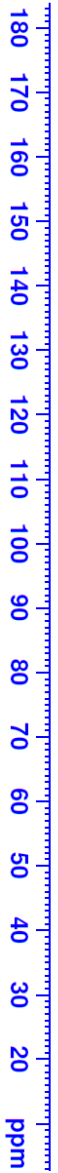

3.3. 2-(6-(Bis(methyl-d<sub>3</sub>)amino)-3-(bis(methyl-d<sub>3</sub>)iminio)-3*H*-xanthen-9-yl)-4-((2-(2-((6-chlorohexyl)oxy)ethoxy)ethyl)carbamoyl)benzoate (CA-TMR-d12)

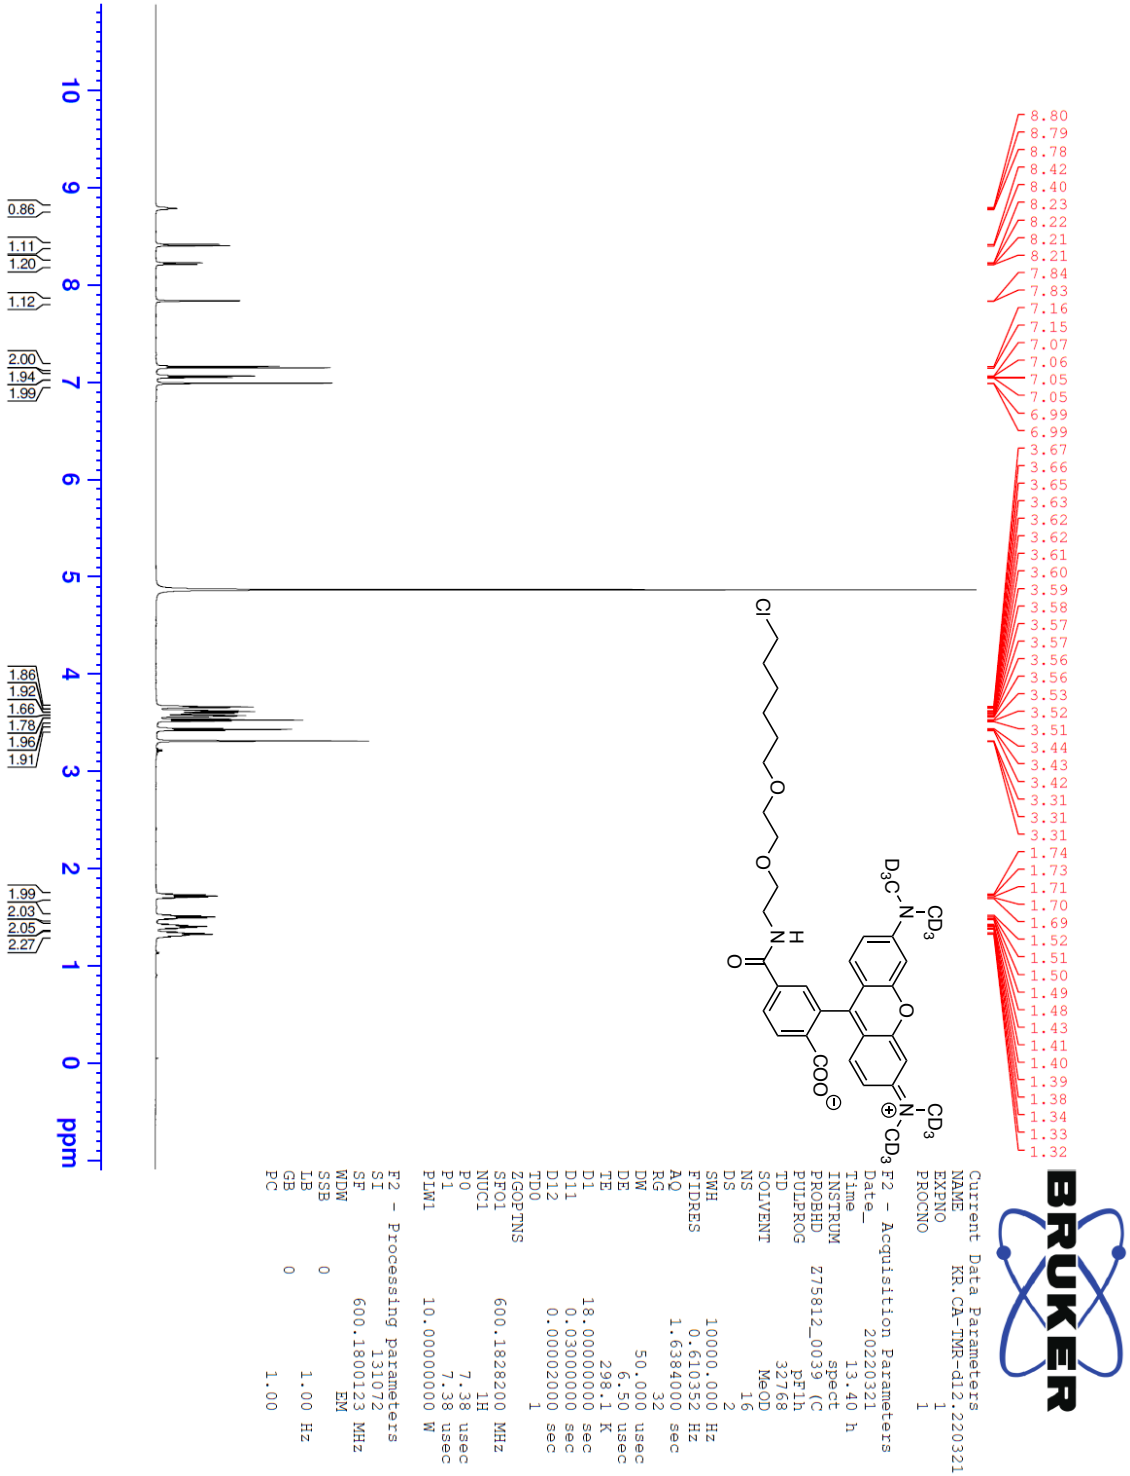

168.00  
167.34  
160.63  
159.11  
159.07  
139.43  
135.53  
134.84  
132.82  
132.11  
130.34  
130.09  
115.52  
114.86  
97.41  
72.13  
71.22  
71.16  
70.36  
45.70  
41.20  
33.73  
30.45  
27.69  
26.44

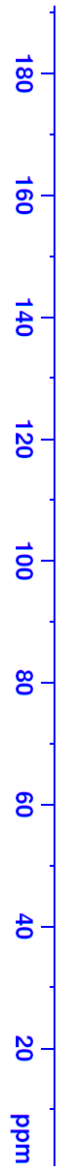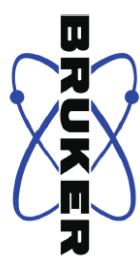

Current Data Parameters  
NAME KR,CA-TMR-d12.220321  
EXPNO 2  
PROCNO 1

F2 - Acquisition Parameters

Date\_ 20220321  
Time 16:06 h  
INSTRUM spect  
PROBHD 275812\_0039 (C  
PULPROG MHerzold  
TD 131072  
SOLVENT MeOD  
NS 2048  
DS 2  
SWH 31250.000 Hz  
FIDRES 0.476837 Hz  
AQ 2.0971520 sec  
RG 236  
DE 16.000 usec  
TE 298.1 K  
D1 2.00000000 sec  
D11 0.03000000 sec  
D12 0.00020000 sec  
TDO 1  
ZGPGTMS -Ddc -Dpac  
SF01 150.9301310 MHz  
NUC1 13C  
P0 11.43 usec  
P3 11.43 usec  
P1M1 120.23000336 W  
SFO2 600.1828200 MHz  
NUC2 1H  
CPDPRGf2 waltz16  
PCPD2 80.00 usec  
P1M2 10.00000000 W  
P1M19 0.07620790 W

F2 - Processing parameters

SI 131072  
SF 150.9151691 MHz  
WDW EM  
SSB 0  
LB 3.00 Hz  
GB 0  
PC 1.40

3.4. 3,7-Bis(bis(methyl-d<sub>3</sub>)amino)-5,5-dimethyl-3'-oxo-3'*H*,5*H*-spiro[dibenzo[*b,e*]siline-10,1'-isobenzofuran]-6'-carboxylic acid (4)

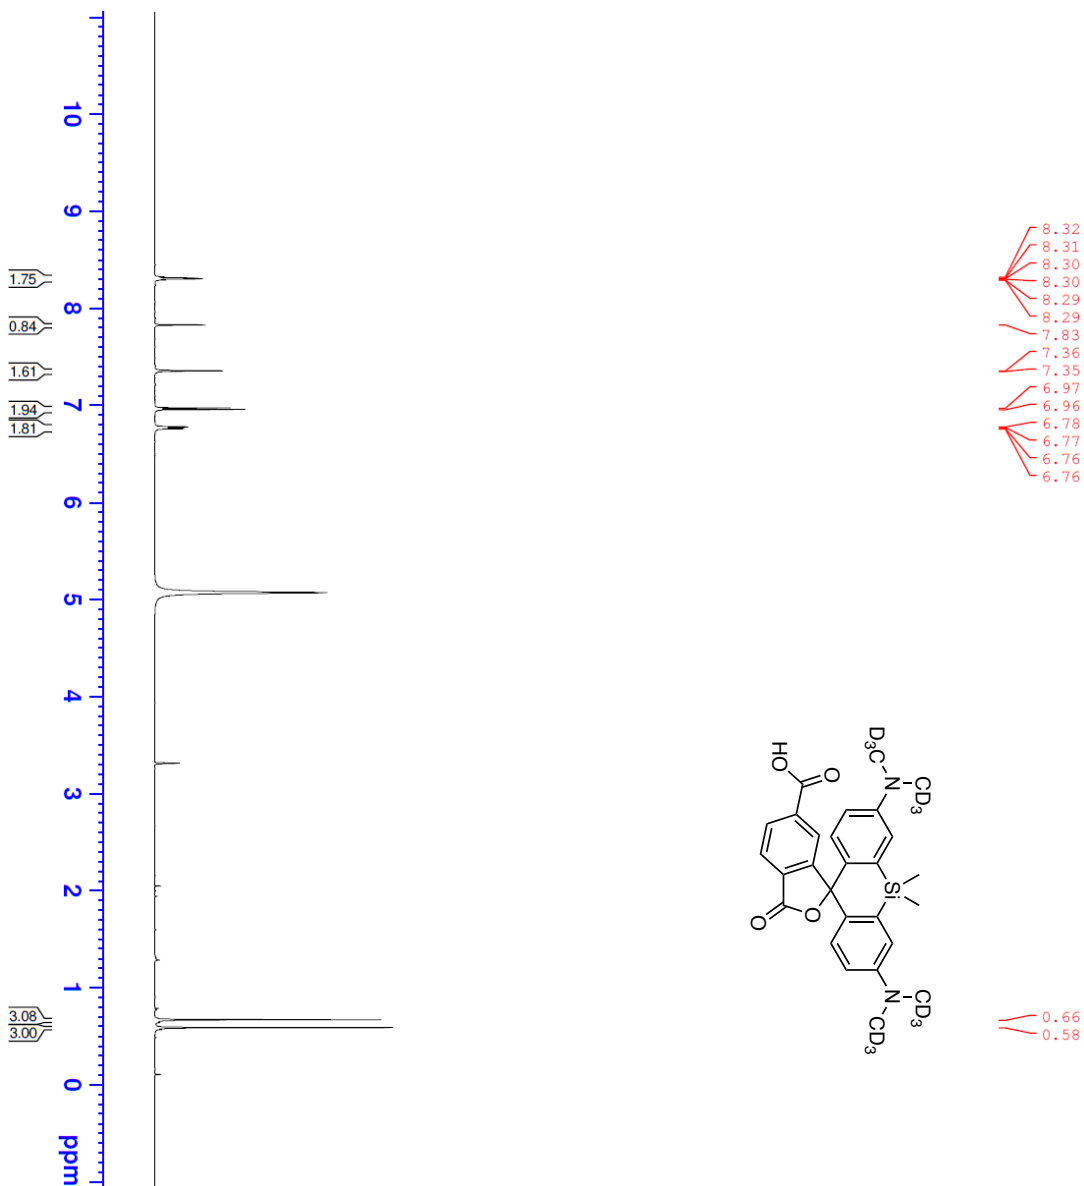

8.32  
8.31  
8.30  
8.30  
8.29  
8.29  
7.83  
7.36  
7.35  
6.97  
6.96  
6.78  
6.77  
6.76  
6.76

0.66  
0.58

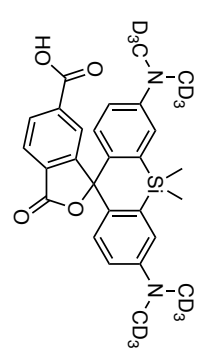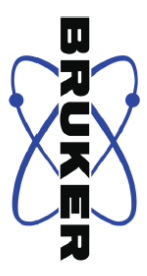

Current Data Parameters  
NAME KR-SIR-d12-COOH\_220208  
EXPNO 1  
PROCNO 1

F2 - Acquisition Parameters  
Date\_ 20220208  
Time 19.21 h  
INSTRUM spect  
PROBHD z132083\_0005 ( MFLH  
PULPROG 32768  
TD 32768  
SOLVENT MeOD  
NS 32  
DS 2

SWH 10000.000 Hz  
FIDRES 0.610352 Hz  
AQ 1.638400 sec  
RG 6.35  
RW 50.000 usec  
DE 6.50 usec  
TE 277.0 K  
D1 1.23992995 sec  
D11 0.03000000 sec  
D12 0.00002000 sec  
TD0 1  
ZGPTNS

SFO1 600.1328200 MHz  
NUC1 1H  
CNS1 1.0000000  
P0 7.20 usec  
P1 7.20 usec  
PLM1 10.00000000 W

F2 - Processing parameters  
SI 32768  
SF 600.1299462 MHz  
WDW no  
SSB 0 Hz  
LB 0  
GB 0  
PC 1.00



168.06  
167.95  
154.75  
147.87  
144.28  
139.99  
135.59  
135.22  
131.67  
131.58  
131.15  
130.00  
121.46  
115.27

-0.72  
-1.78

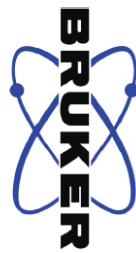

Current Data Parameters  
 NAME KR,SfR-d12-COOH-re,220208  
 EXPNO 1  
 PROCNO 1

F2 - Acquisition Parameters  
 Date\_ 20220209  
 Time 16.02 h  
 INSTRUM spect  
 PROBD 2132083\_0005 (Methacrylid  
 PULPROG 131072  
 TD 3600  
 SOLVENT MeOD  
 NS 3072  
 DS 4  
 SFR 36231.883 Hz  
 FIDRES 0.552855 Hz  
 AQ 1.8087935 sec  
 RG 256  
 DW 13.800 usec  
 DE 20.00 usec  
 TE 300.0 K  
 D1 2.50000000 sec  
 D11 0.03000000 sec  
 D12 0.00002000 sec  
 TDO 3  
 ZGPRGMS -Pdc -Dnose  
 SFO1 150.9178090 MHz  
 NUC1 13C  
 NUC2 1H  
 P0 1.0000000  
 P3 12.25 usec  
 P1M1 100.00000000 W  
 SFO2 600.1328200 MHz  
 NUC2 1H  
 CDDPRG1 waltz16  
 PCPD2 80.00 usec  
 P1M2 10.00000000 W  
 P1M19 0.08035262 W  
 F2 - Processing parameters  
 SI 131072  
 SF 150.9026383 MHz  
 WDW 0 EM  
 SSB 0  
 GB 0  
 PC 1.00

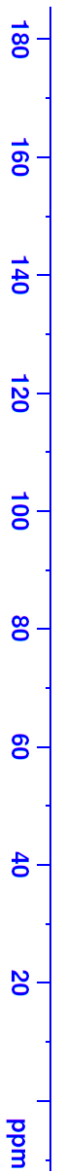

3.5. 4-((4-(((2-Amino-9H-purin-6-yl)oxy)methyl)benzyl)carbamoyl)-2-(7-(bis(methyl-d<sub>3</sub>)amino)-3-(bis(methyl-d<sub>3</sub>)iminio)-5,5-dimethyl-3,5-dihydrodibenzo[*b,e*]silin-10-yl)benzoate (BG-SiR-d12)

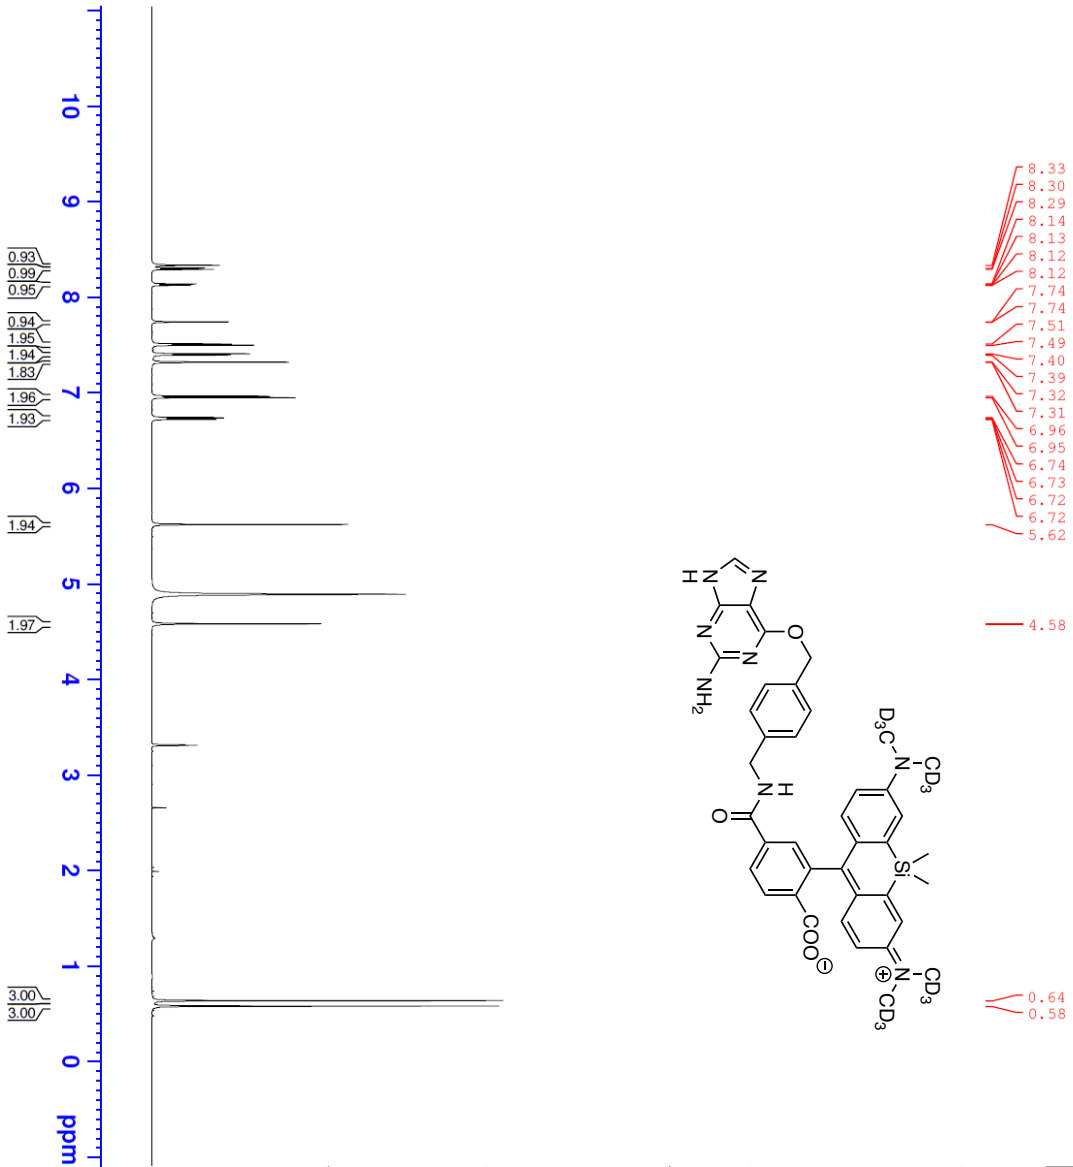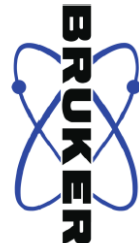

Current Data Parameters  
 Name: KR.BG-SiR-d12.220310  
 ExpNo: 10  
 ProcNo: 1

F2 - Acquisition Parameters  
 Date\_: 20220310  
 Time: 18.18 h  
 INSTRUM: spect  
 PROBHD: Z132083\_00051  
 PULPROG: ME1H  
 TD: 32768  
 SOLVENT: MeOD  
 NS: 32  
 DS: 2  
 SWH: 10000.000 Hz  
 FIDRES: 0.610352 Hz  
 AQ: 1.6384000 sec  
 RG: 6.35  
 DM: 50.000 usec  
 DE: 6.50 usec  
 IE: 300.0 K  
 D1: 5.00000000 sec  
 D11: 0.03000000 sec  
 D12: 0.00002000 sec  
 TD0: 1  
 ZGPRGNS: 1  
 SFO1: 600.1328200 MHz  
 NUC1: 1H  
 CNUST1: 1.0000000  
 P0: 7.20 usec  
 P1: 7.20 usec  
 PLM1: 10.00000000 W

F2 - Processing parameters  
 SI: 32768  
 SF: 600.1300116 MHz  
 WDM: EM  
 SSB: 0  
 TB: 1.00 Hz  
 GB: 0  
 PC: 1.00

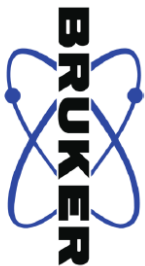

Current Data Parameters  
NAME KR:BG-SIR-d12.220310  
EXPNO 11  
PROCNO 1

F2 - Acquisition Parameters  
Date\_ 20220311  
Time 0.14 h

INSTRUM spect  
PROBHD Z132083.0005 (Methereid  
PULPROG 131072  
ID 131072  
SOLVENT MeOD  
NS 5120  
DS 4

SWH 31250.000 Hz  
FIDRES 0.476837 Hz  
AQ 2.0971520 sec  
RG 1820  
DW 16.000 usec  
DE 15.00 usec  
TE 300.0 K

D1 2.00000000 sec  
D11 0.03000000 sec  
D12 0.00002000 sec  
TD0 1  
ZGPGTNS -Ddc -Dnoe  
SFO1 150.917585 MHz  
NUC1 13C  
CNST1 1.00000000

P0 12.00 usec  
P3 12.00 usec  
PIM1 100.00000000 W  
SFO2 600.1328200 MHz  
NUC2 1H  
CPDPRG1 waltz16

PCPD2 80.00 usec  
PLM2 10.00000000 W  
PLM19 0.08100000 W

F2 - Processing parameters  
SI 4096  
SF 150.9025954 MHz  
WDW EM  
SSB 0  
LB 5.00 Hz  
GB 0  
PC 1.00

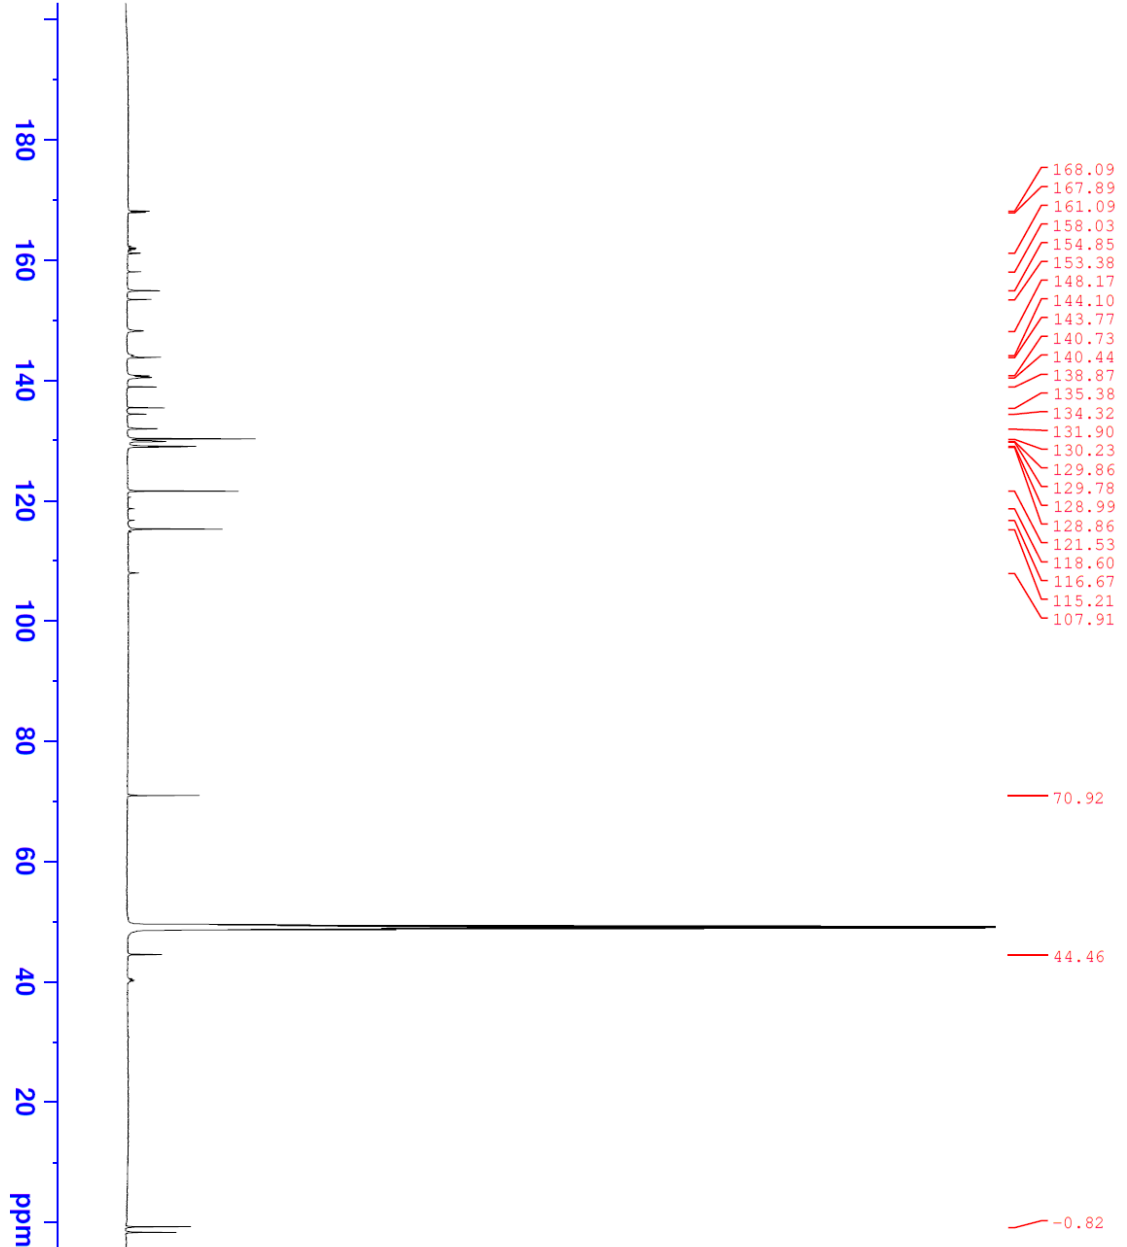

3.6. 2-(7-(Bis(methyl-d<sub>3</sub>)amino)-3-(bis(methyl-d<sub>3</sub>)iminio)-5,5-dimethyl-3,5-dihydrodibenzo[*b,e*]silen-10-yl)-4-((2-(2-((6-chlorohexyl)oxy)ethoxy)ethyl)carbamoyl)benzoate (CA-SiR-d12)

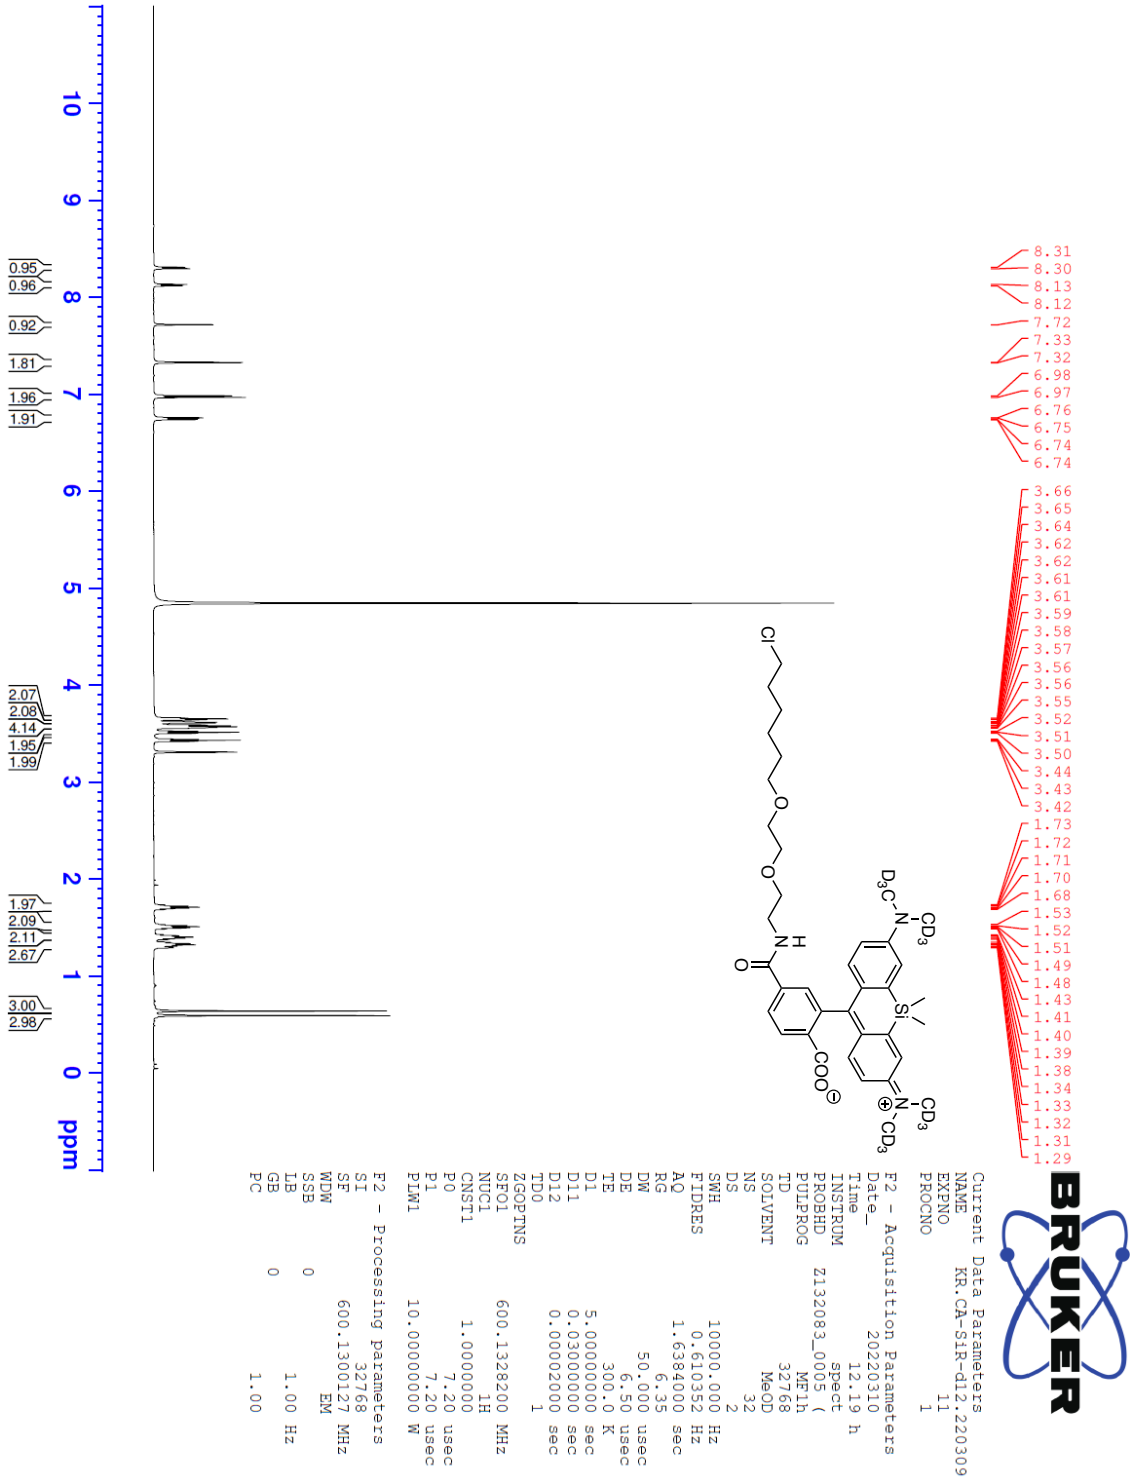

168.14  
167.79  
155.05  
148.48  
140.91  
138.95  
134.35  
131.97  
129.82  
128.95  
121.53  
115.12  
72.09  
71.13  
70.36  
45.68  
41.14  
33.70  
30.73  
30.42  
27.65  
26.42  
-0.88

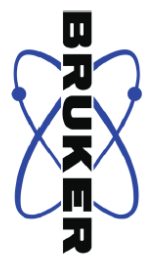

Current Data Parameters  
NAME KR.GA-SIR-d12.220309  
EXPNO 10  
PROCNO 1

F2 - Acquisition Parameters  
Date\_ 20220310  
Time 12.15 h

INSTRUM spect  
PROBHD Z132083.0005 (Mheteroid  
PULPROG 131072  
TD 10240  
SOLVENT MeOD  
NS 4  
DS 4  
SWH 31250.000 Hz  
FIDRES 0.476837 Hz  
AQ 2.0971520 sec  
RG 2050  
DM 16.000 usec  
DE 15.00 usec  
TE 300.0 K  
D1 2.00000000 sec  
D11 0.03000000 sec  
D12 0.00002000 sec  
TD0 1  
ZGPTNS -Ddc -Dnoe  
SFO1 150.917585 MHz  
NUC1 13C  
CNST1 1.0000000  
P0 12.00 usec  
P3 12.00 usec  
PLW1 100.00000000 W  
SFO2 600.1328200 MHz  
NUC2 1H  
CPDPRG11 waitz16  
PCPD2 80.00 usec  
PLM2 10.00000000 W  
PLM19 0.08100000 W

F2 - Processing parameters  
SI 4096  
SF 150.9025962 MHz  
WDW EM  
SSB 0  
LB 5.00 Hz  
GB 0  
PC 1.00

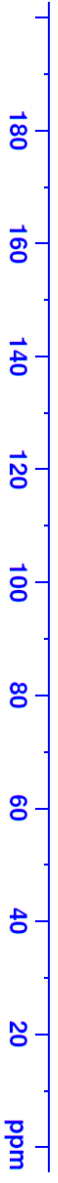

3.7. 2-(6-(Bis(methyl-d<sub>3</sub>)amino)-3-(bis(methyl-d<sub>3</sub>)iminio)-3*H*-xanthen-9-yl)-4-((2-(2,5-dioxo-2,5-dihydro-1*H*-pyrrol-1-yl)ethyl)carbamoyl)benzoate (Mal-TMR-d12)

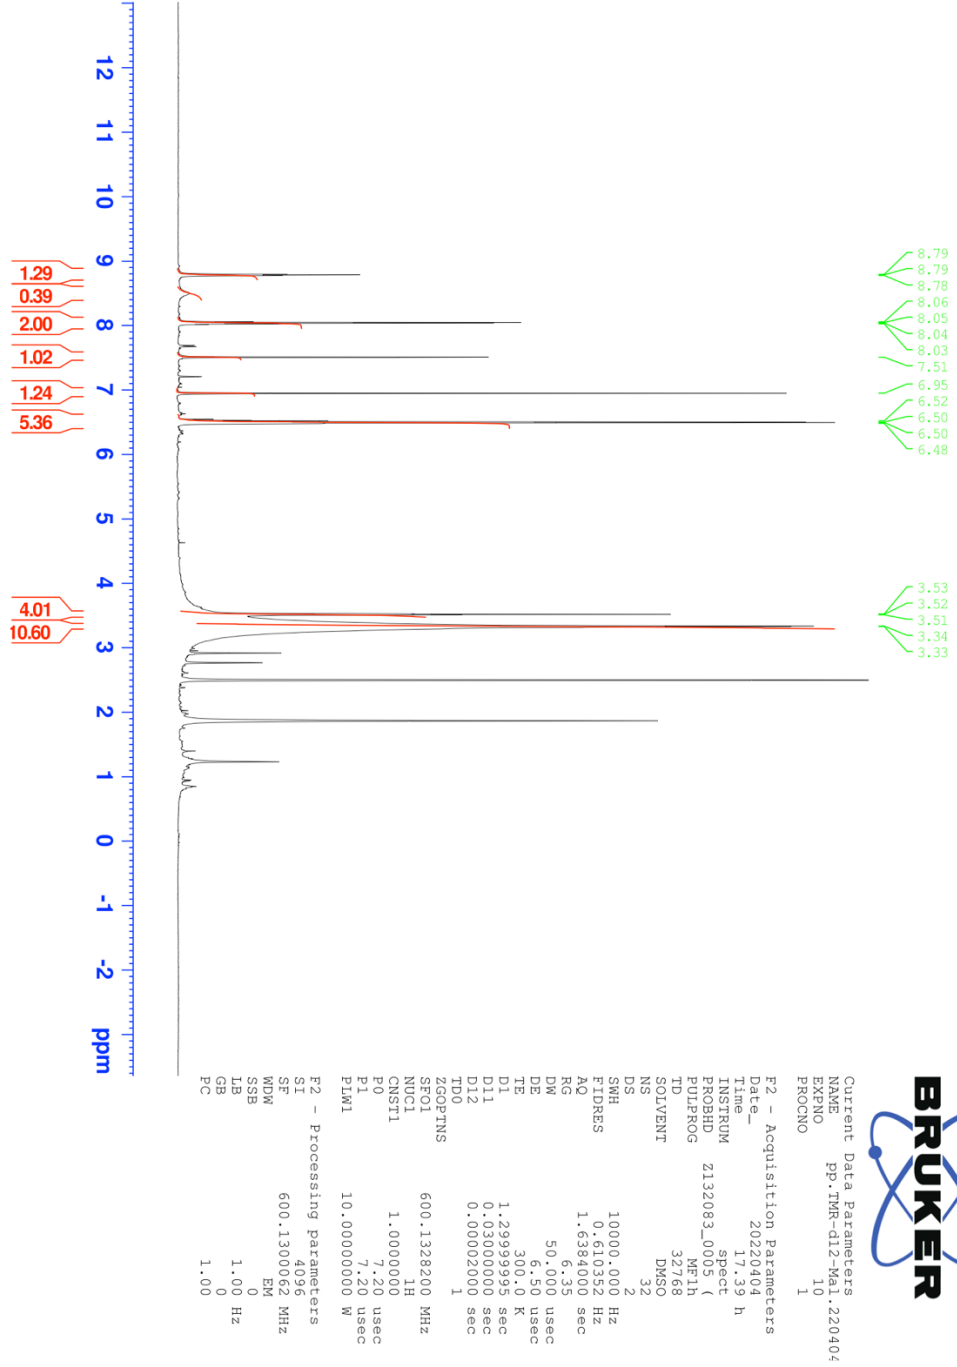

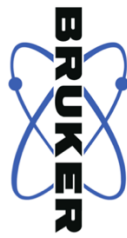

Current Data Parameters  
NAME pp.TMR-d12-Mal.220404  
EXPNO 11  
PROCNO 1

F2 - Acquisition Parameters

Date\_ 20220405  
Time\_ 6.56 h  
INSTRUM spect  
PROBHD 2132083.0005 ( MFhetero1d  
PULPROG 131072  
TD 10240  
SOLVENT DMSO  
NS 8  
DS 31250.000 Hz  
SWH 0.476837 Hz  
FIDRES 2.0971520 sec  
AQ 2050  
RG 16.000 usec  
DE 20.00 usec  
TE 300.0 K  
D1 2.50000000 sec  
D11 0.03000000 sec  
D12 0.00002000 sec  
TD0 1  
ZGPTNS -Ddc -Dhse  
SF01 150.9175585 MHz  
NUC1 13C  
CNS11 0.3000000  
P0 3.60 usec  
P3 12.00 usec  
PLW1 100.00000000 W  
SF02 600.1328200 MHz  
NUC2 1H  
CPDPRG1 waltz16  
PCPD2 80.00 usec  
PLW2 10.00000000 W  
PLW19 0.08100000 W

F2 - Processing parameters

SI 4096  
SF 150.9028818 MHz  
WDW EM  
SSB 0  
GB 5.00 Hz  
PC 1.00

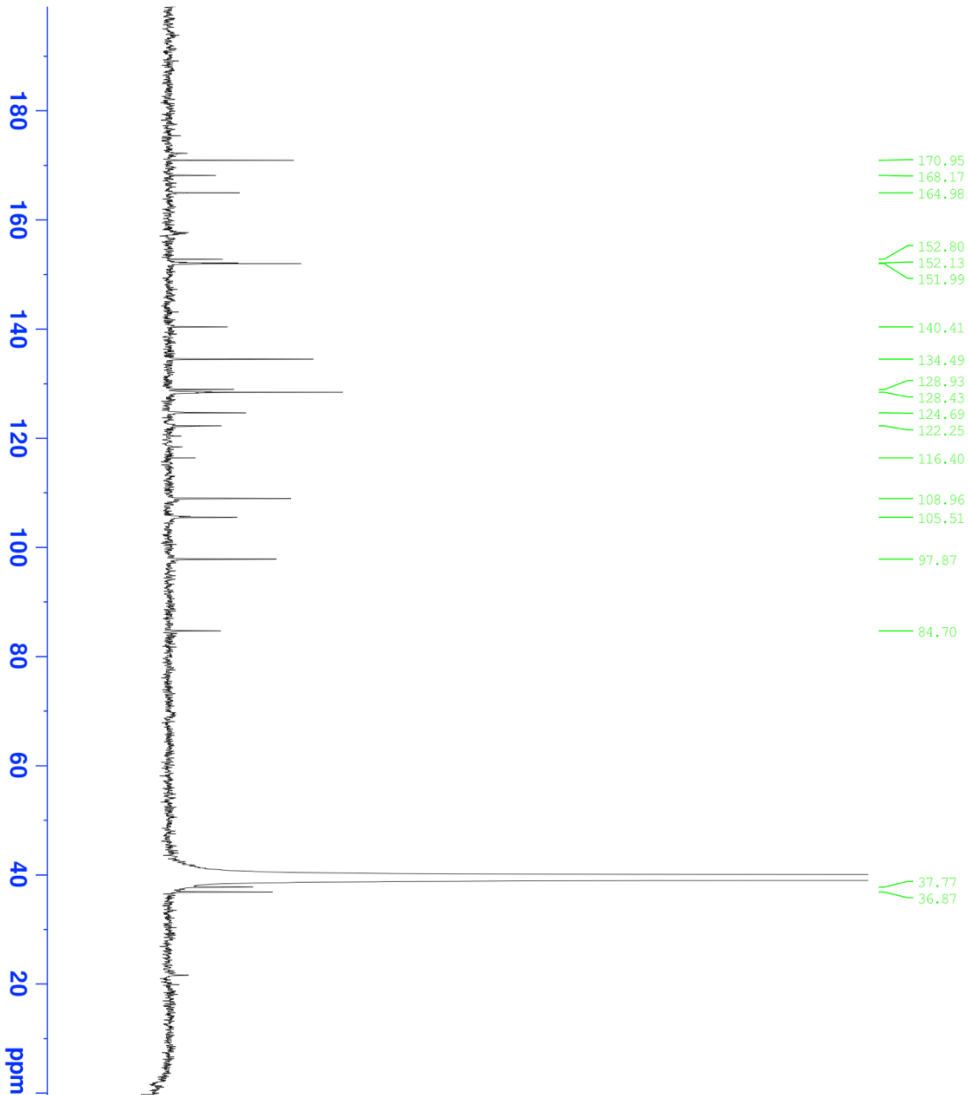

3.8. 2-(7-(bis(methyl-d3)amino)-3-(bis(methyl-d3)iminio)-5,5-dimethyl-3,5-dihydrodibenzo[b,e]silin-10-yl)-4-((2-(2,5-dioxo-2,5-dihydro-1H-pyrrol-1-yl)ethyl)carbamoyl)benzoate (Mal-SiR-d12)

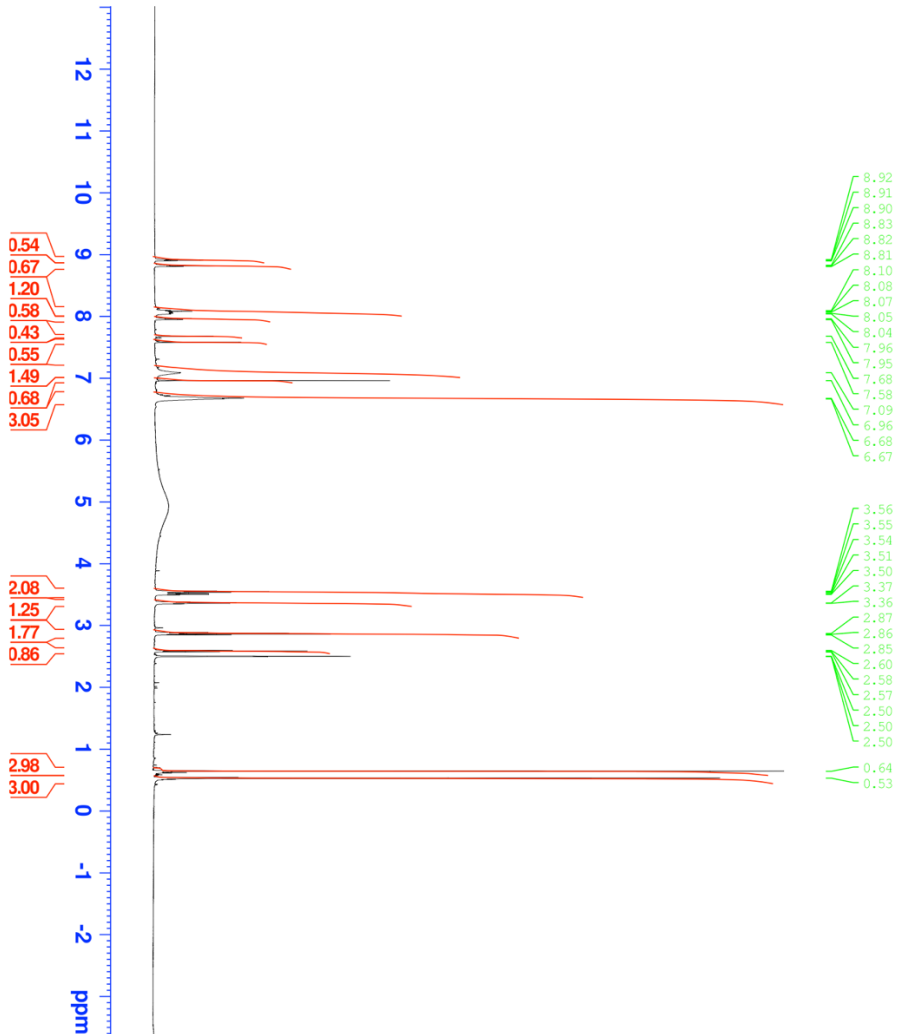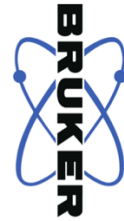

Current Data Parameters  
 NAME pp-SiR-d12-Mal-220405  
 EXPNO 1  
 PROCNO 1

F2 - Acquisition Parameters  
 Date\_ 20220409  
 Time 12:43 h  
 INSTRUM spect  
 PROBHD 275812\_0039\_1C  
 PULPROG ME1h  
 TD 32768  
 SOLVENT DMSO  
 NS 32  
 DS 4  
 SWH 10000.000 Hz  
 FIDRES 0.810322 Hz  
 AQ 1.6384926 sec  
 SFO 50.000 usec  
 DE 6.50 usec  
 TE 300.0 K  
 D1 1.29999995 sec  
 D11 0.03000000 sec  
 D12 0.00002000 sec  
 TDO 1

ZGPRFMS  
 SFO1 600.1828200 MHz  
 NUC1 1H  
 CNST1 1.0000000  
 P0 7.13 usec  
 P1 7.13 usec  
 PLW1 10.00000000 W

F2 - Processing parameters  
 SF 600.180054 MHz  
 WDW QSTINE  
 SSB 2 Hz  
 LB 0 Hz  
 GB 0 Hz  
 PC 1.00



172.61  
171.02  
165.19  
164.86  
158.54  
158.29  
158.05  
157.81  
149.29  
139.59  
134.52  
130.57  
128.19  
127.97  
125.60  
122.71  
114.62  
113.95

37.81  
36.89  
36.73  
33.57  
33.01

-0.07  
-1.34

**BRUKER**

Current Data Parameters  
 NAME pp\_sir-d12-Mal\_220405  
 EXPNO 2  
 PROCNO 1

F2 - Acquisition Parameters  
 Date\_ 20220410  
 Time 13.47 h  
 INSTRUM spect  
 PROBHD 275812\_0039 (C  
 PULPROG MFfeteroid4  
 TD 131072  
 SOLVENT DMSO  
 NS 20480  
 DS 4  
 SWH 35714.285 Hz  
 FIDRES 0.544957 Hz  
 AQ 1.8350080 sec  
 RG 256  
 DW 14.000 usec  
 DE 20.00 usec  
 TE 300.0 K  
 D1 2.50000000 sec  
 D11 0.03000000 sec  
 D12 0.00002000 sec  
 TD0 20  
 ZCQPTNS -Ddc -Proc  
 SFO1 150.9303810 MHz  
 NUC1 13C  
 CUSI1 1.0000000  
 F0 13.20 usec  
 F3 13.20 usec  
 PLM1 100.00000000 W  
 SFO2 600.1828200 MHz  
 NUC2 1H  
 NUCZ  
 CPDPRG12 waltz16  
 PCPD2 80.00 usec  
 PLM2 10.00000000 W  
 PLM19 0.07079457 W

F2 - Processing Parameters  
 SI 131072  
 SF 150.9154540 MHz  
 WDM EM  
 SSB 0  
 LB 3.00 Hz  
 GB 0  
 PC 1.40

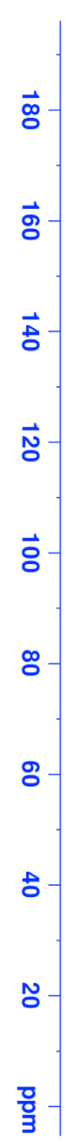

### 3.9. 7-(Dimethylamino)-4-methyl-2H-chromen-2-one (Coumarin 461)

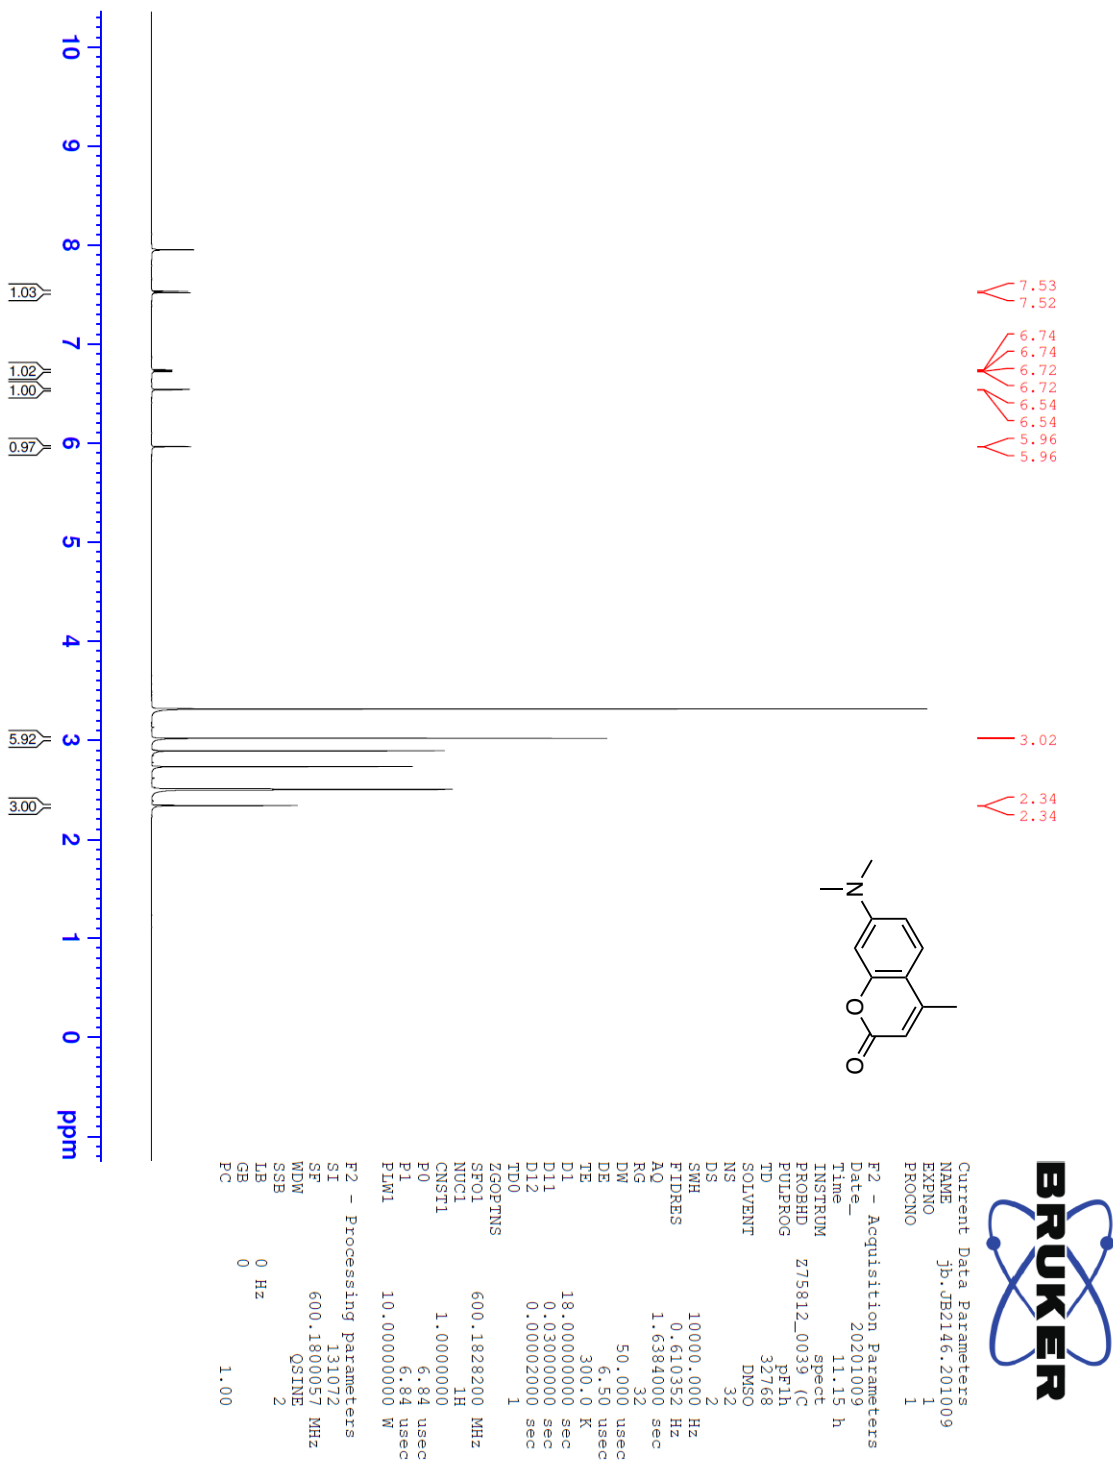

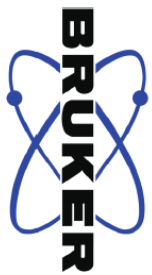

Current Data Parameters  
 NAME jp.JB2146.201009  
 EXPNO 2  
 PROCNO 1

F2 - Acquisition Parameters

Date\_ 20201009  
 Time 11.28 h  
 INSTRUM spect  
 PROBHD 275812\_0039 (C  
 PULPROG Mheteroid  
 TD 65536  
 SOLVENT DMSO  
 NS 128  
 DS 0

SWH 31250.000 Hz  
 FIDRES 0.953674 Hz  
 AQ 1.0485760 sec

RG 256  
 DW 16.000 usec  
 DE 20.00 usec  
 TE 300.0 K  
 D1 2.00000000 sec  
 D11 0.03000000 sec  
 D12 0.00002000 sec  
 TD0 1

ZGPGTNS -Ddc -Dnoe  
 SF01 150.9301310 MHz  
 NUC1 13C  
 CNST1 1.00000000

P0 11.43 usec  
 P3 11.43 usec  
 PLW1 120.23000336 W  
 SF02 600.1828200 MHz

NUC2 1H  
 CPDPRG11 waltz16  
 PCPD2 80.00 usec  
 PLW2 10.00000000 W  
 PLW19 0.09751600 W

F2 - Processing Parameters  
 SI 32768  
 SF 150.9153833 MHz  
 WDW EM  
 SSB 0  
 LB 1.00 Hz  
 GB 0  
 PC 1.40

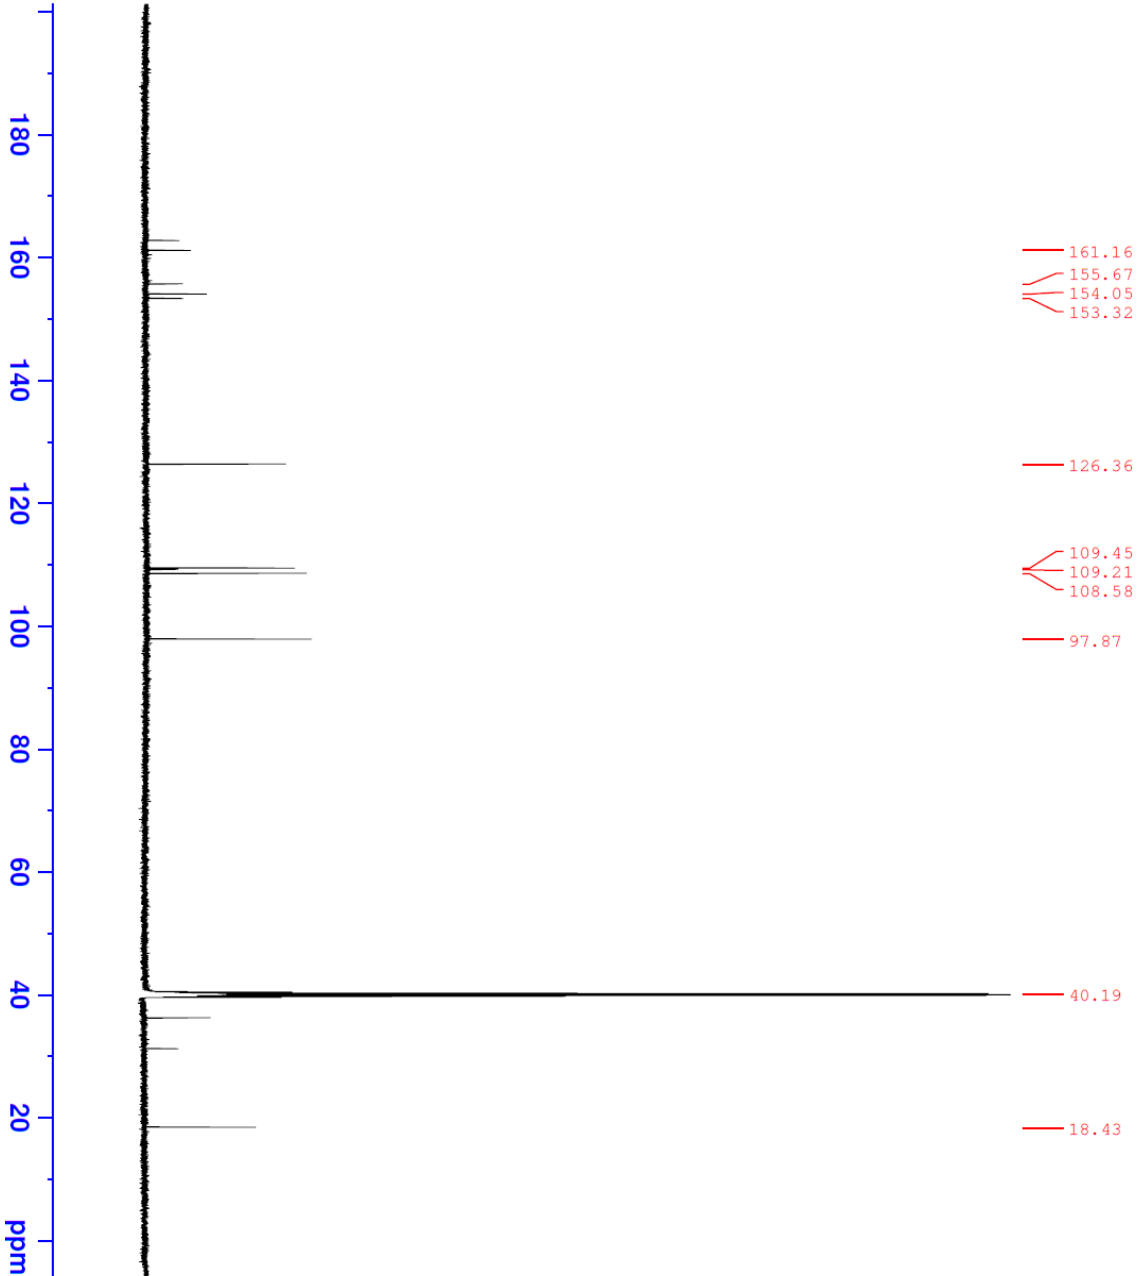

3.10. 4-Methyl-7-((methyl-d3)amino)-2H-chromen-2-one (6)

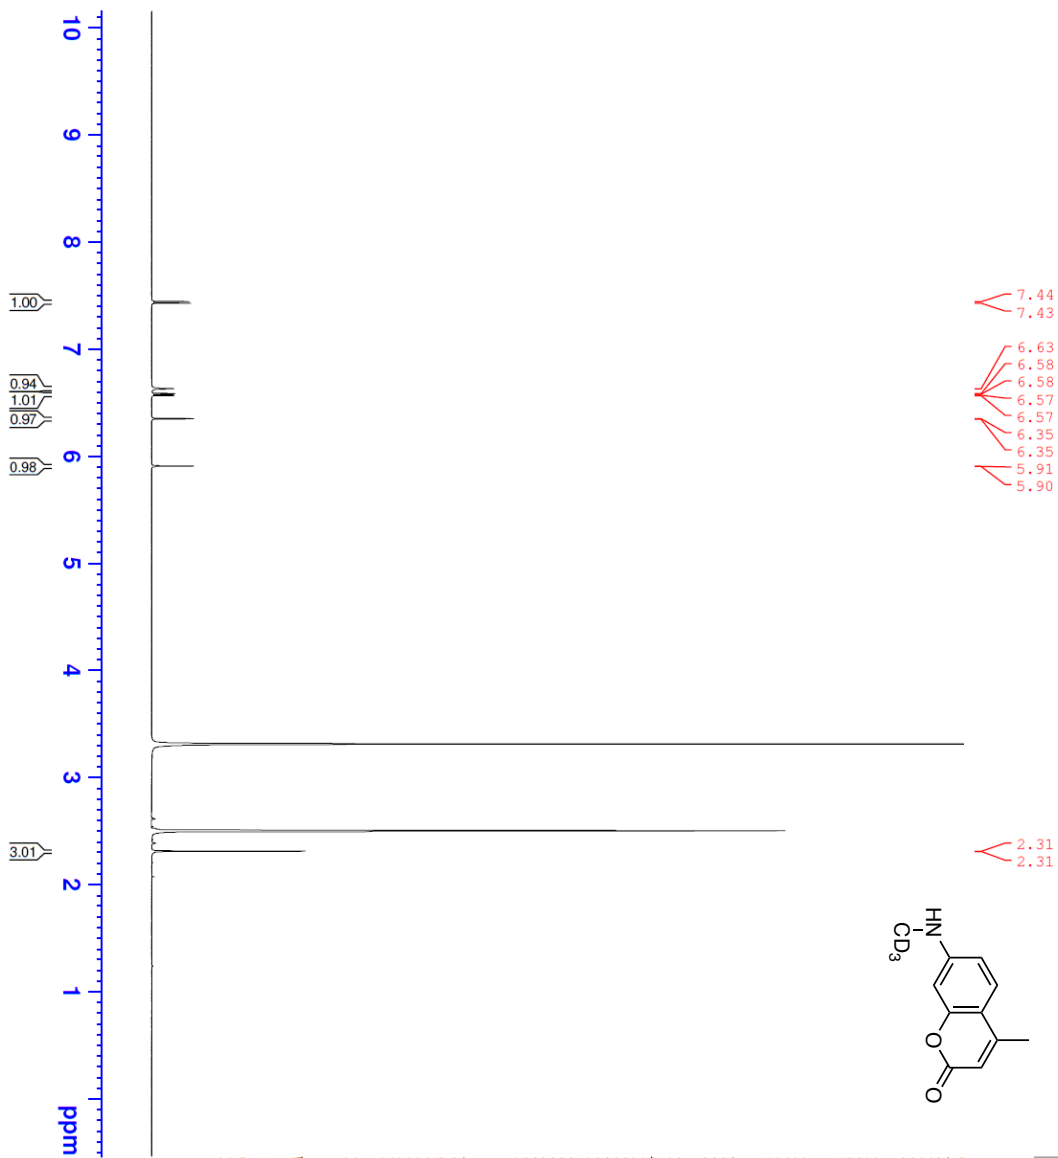

7.44  
7.43  
6.63  
6.58  
6.58  
6.57  
6.57  
6.35  
6.35  
5.91  
5.90

2.31  
2.31

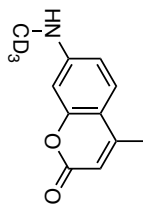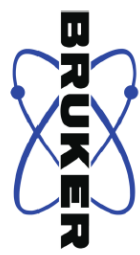

Current Data Parameters  
NAME RR.283.211116  
EXNO 10  
PROCNO 1

F2 - Acquisition Parameters  
Date\_ 20211116  
Time 13.22 h  
INSTRUM spect  
PROBHD Z114607\_0090 (MFL1)  
PULPROG zgpg30  
ID 32768  
SOLVENT DMSO  
NS 32  
DS 4  
SWH 10000.000 Hz  
FIDRES 0.610352 Hz  
AQ 1.638400 sec  
RG 144  
DW 50.000 usec  
DE 6.50 usec  
TE 300.0 K  
D1 5.00000000 sec  
D11 0.03000000 sec  
D12 0.00002000 sec  
TD0 1  
ZGPGTNS  
SFO1 599.8228194 MHz  
NUC1 1H  
CNST1 0.3000000  
P0 3.00 usec  
P1 10.00 usec  
PLM1 31.62299919 W

F2 - Processing parameters  
SI 32768  
SF 599.8200051 MHz  
WDW no  
SSB 0 Hz  
LB 0 Hz  
GB 0  
PC 1.00



3.11. 4-Methyl-7-(methyl(methyl-d3)amino)-2H-chromen-2-one (Coumarin 461-d3)

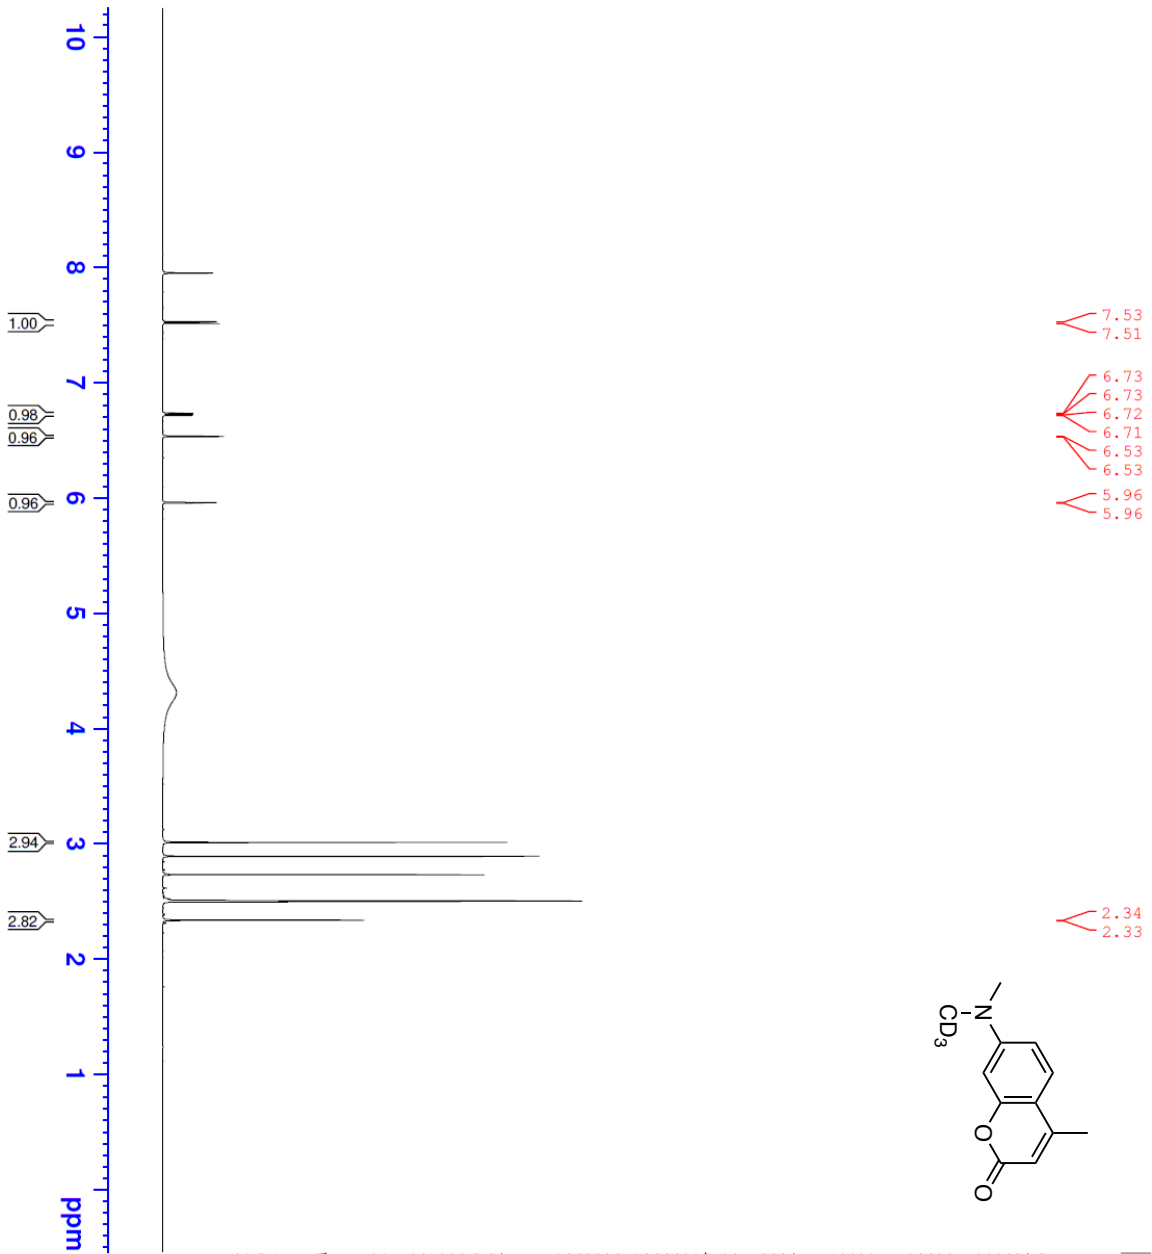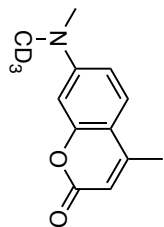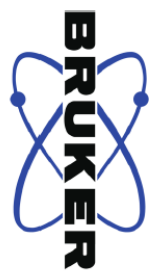

Current Data Parameters  
 NAME jh.JB2147.201009  
 EXPNO 1  
 PROCNO 1

F2 - Acquisition Parameters  
 Date\_ 20201009  
 Time 12.38 h  
 INSTRUM spect  
 PROBHD Z75812\_0039 (C  
 PULPROG zgpg30  
 TD 32768  
 ID pF1h  
 SOLVENT DMSO  
 NS 32  
 DS 2  
 SWH 10000.000 Hz  
 FIDRES 0.610352 Hz  
 AQ 1.638400 sec  
 RG 32  
 DN 50.000 usec  
 DE 6.50 usec  
 TE 300.0 K  
 D1 18.00000000 sec  
 D11 0.03000000 sec  
 D12 0.00002000 sec  
 TD0 1  
 ZGPGPNS  
 SFO1 600.1828200 MHz  
 NUC1 1H  
 CNU1 1.0000000  
 P0 7.26 usec  
 P1 7.26 usec  
 PL1 10.00000000 W  
 PL11  
 F2 - Processing parameters  
 SI 131072  
 SF 600.1800056 MHz  
 WDM QSINE  
 SSB 2  
 LB 0 Hz  
 GB 0  
 PC 1.00

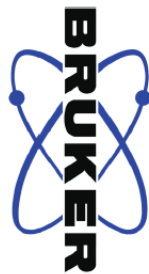

Current Data Parameters  
 NAME Jb.JB2147.201009  
 EXPNO 2  
 PROCNO 1

F2 - Acquisition Parameters

Date\_ 20201009  
 Time 12.45 h  
 INSTRUM spect  
 PROBHD 275812\_0039 (C  
 PULPROG MfHeteroid  
 TD 65536  
 SOLVENT DMSO  
 NS 128

DS 0  
 SMH 31250.000 Hz  
 FIDRES 0.953674 Hz  
 AQ 1.0485760 sec

RG 256  
 DE 16.000 usec  
 TE 20.00 usec  
 D1 300.0 K  
 D11 2.00000000 sec  
 D12 0.03000000 sec  
 D12 0.00002000 sec

TD0 1  
 ZGPTNS -Ddc -Dnoe  
 SFO1 150.9301310 MHz  
 NUC1 13C  
 CNST1 1.0000000

P0 11.43 usec  
 P3 11.43 usec  
 PLW1 120.23000336 W  
 SFO2 600.1828200 MHz

NUC2 1H  
 CPDPRG1 waltz16  
 PCPD2 80.00 usec  
 PLW2 10.00000000 W  
 PLW19 0.09751600 W

F2 - Processing parameters  
 SI 32768  
 SF 150.9153810 MHz  
 WDW EM  
 SSB 0  
 LB 1.00 Hz  
 GB 0  
 PC 1.40

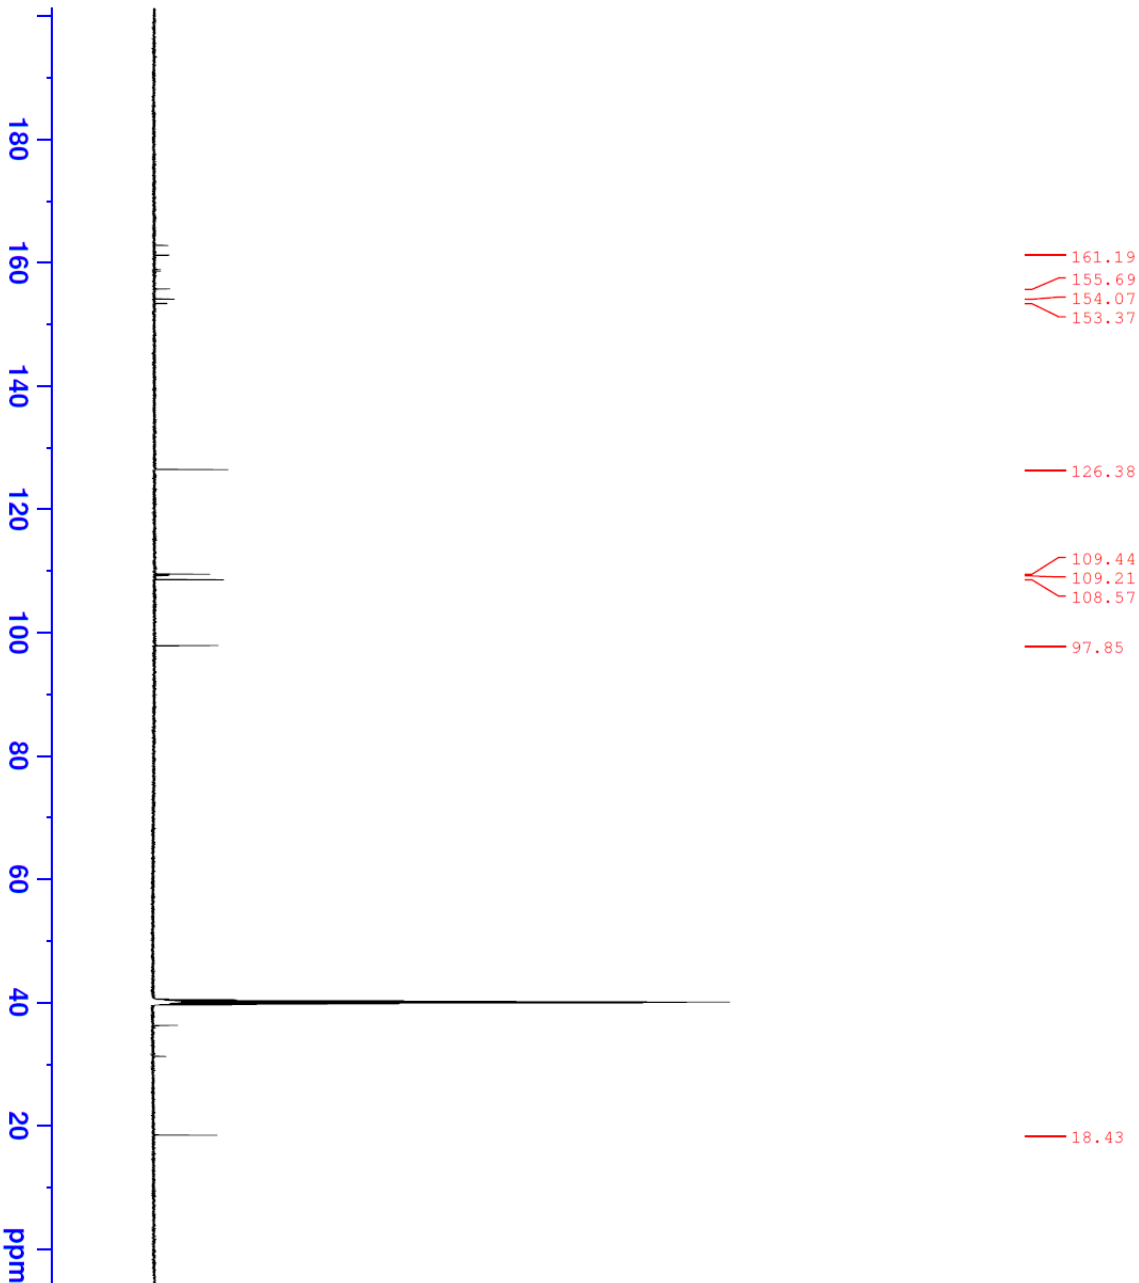

3.12. 7-(Bis(methyl-d3)amino)-4-methyl-2H-chromen-2-one (Coumarin 461-d6)

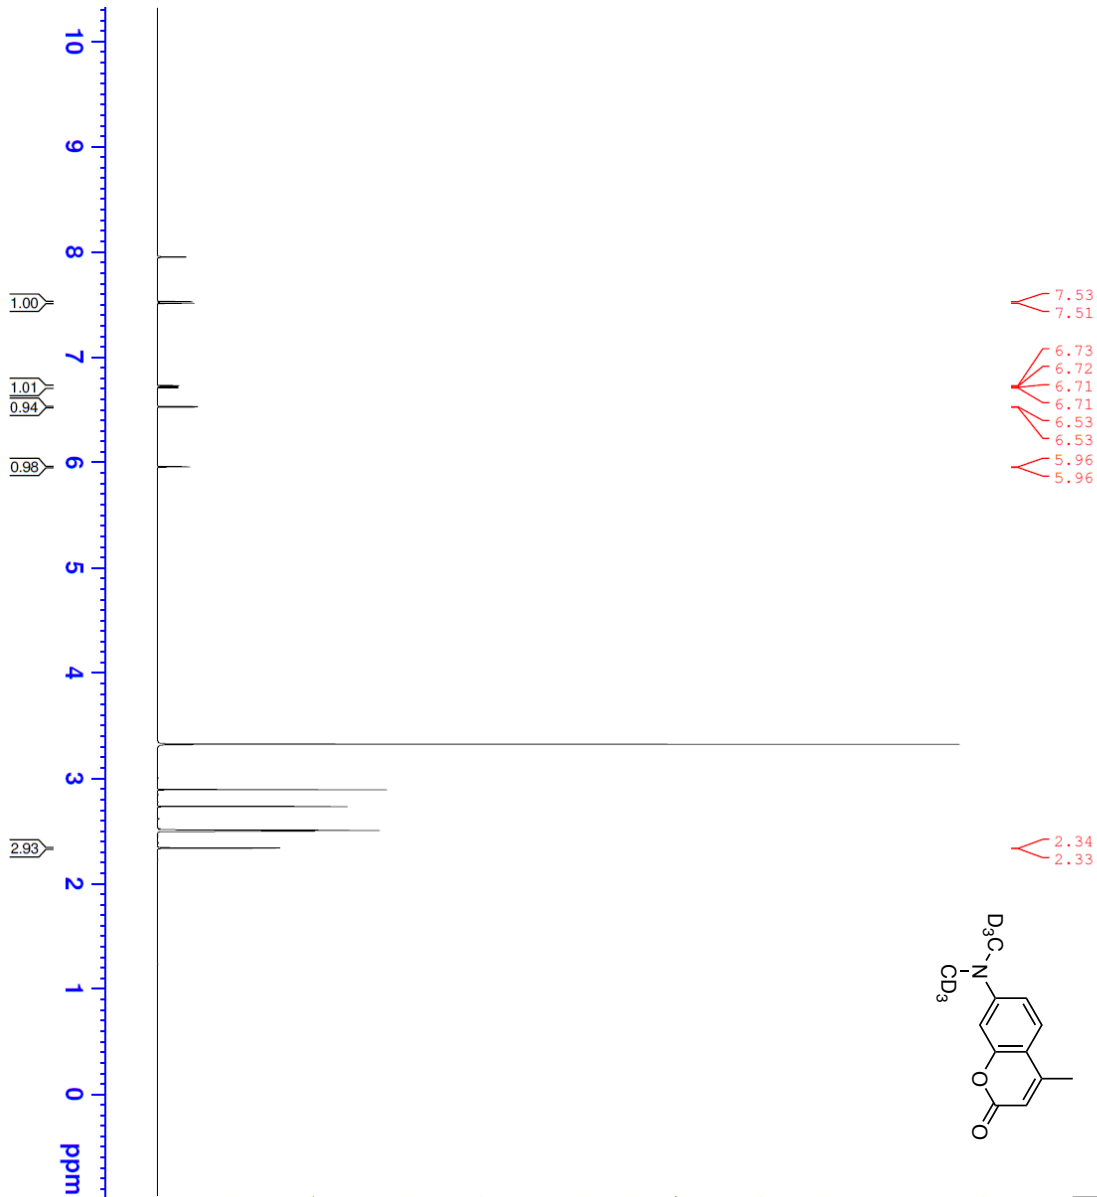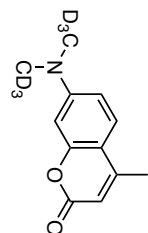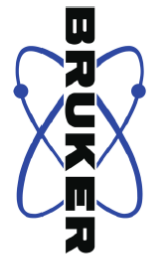

Current Data Parameters  
 NAME jh.JB2148.201009  
 EXPNO 1  
 PROCNO 1

F2 - Acquisition Parameters  
 Date\_ 20201009  
 Time 12.12 h

INSTRUM spect  
 PROBHD Z75812\_0039 (C  
 PULPROG zgpg30  
 TD 32768  
 SOLVENT DMSO  
 NS 32  
 DS 2  
 SMH 10000.000 Hz  
 FIDRES 0.610352 Hz  
 AQ 1.6384000 sec  
 RG 32  
 DE 50.000 usec  
 TE 300.0 K

D1 18.00000000 sec  
 D11 0.03000000 sec  
 D12 0.00002000 sec  
 TD0 1  
 ZGAPTNS  
 SFO1 600.1828200 MHz  
 NUC1 1H  
 CNST1 1.0000000  
 P0 6.96 usec  
 P1 6.96 usec  
 P1M1 10.00000000 W

F2 - Processing parameters  
 SI 131072  
 SF 600.1800036 MHz  
 MDW QSINE  
 SSB 2  
 LB 0 Hz  
 GB 0  
 PC 1.00



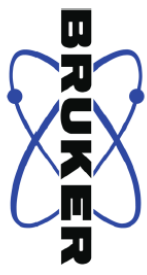

Current Data Parameters  
 NAME Jb.JB2148.201009  
 EXPNO 2  
 PROCNO 1

F2 - Acquisition Parameters

Date\_ 20201009  
 Time 12.20 h  
 INSTRUM spect  
 PROBHD Z75812\_0039 (C  
 PULPROG MftHetero1d  
 TD 65536  
 SOLVENT DMSO  
 NS 128

DS 0  
 SMH 31250.000 Hz  
 FIDRES 0.953674 Hz  
 AQ 1.0485760 sec

RG 256  
 DM 16.000 usec  
 DE 20.00 usec  
 TE 300.0 K

D1 2.00000000 sec  
 D11 0.03000000 sec  
 D12 0.00002000 sec

TD0 1  
 ZGPRGMS -Ddc -Dnoe  
 SF01 150.9301310 MHz  
 NUC1 13C

CNST1 1.0000000  
 P0 11.43 usec  
 P3 11.43 usec

PLM1 120.23000336 W  
 SF02 600.1828200 MHz  
 NUC2 1H

CPDPRG11 waltz16  
 PCPD2 80.00 usec  
 PLM2 10.00000000 W  
 PLM19 0.09751600 W

F2 - Processing parameters  
 SI 32768  
 SF 150.9153810 MHz  
 MDM EM  
 SSB 0  
 LB 1.00 Hz  
 GB 0  
 PC 1.40

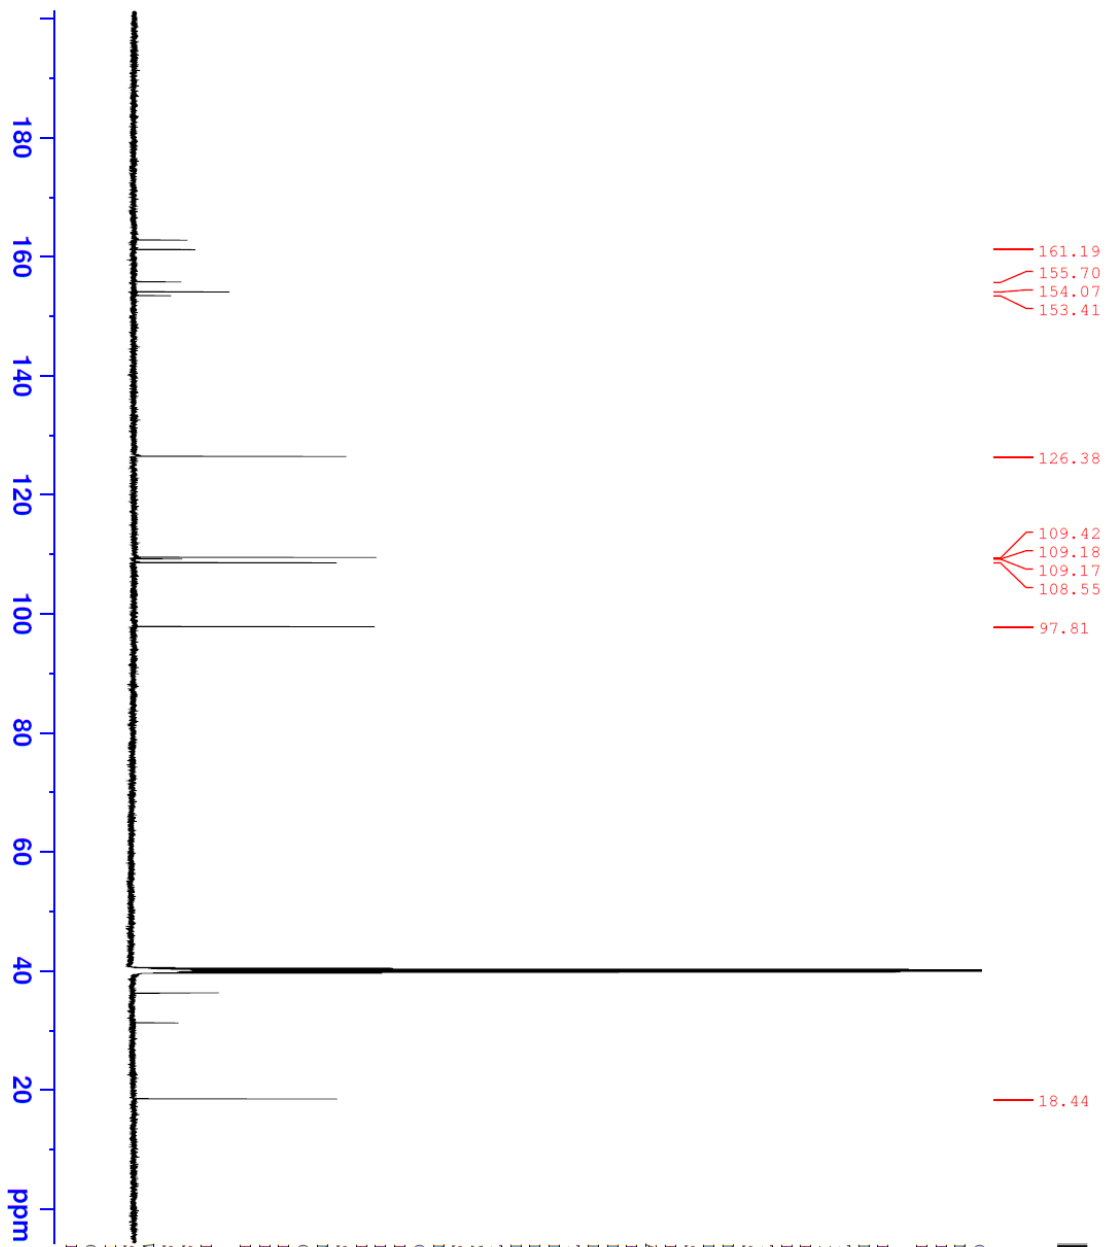

3.13.

*N,N*-Dimethyl-7-nitrobenzo[*c*][1,2,5]oxadiazol-4-amine (NBD)

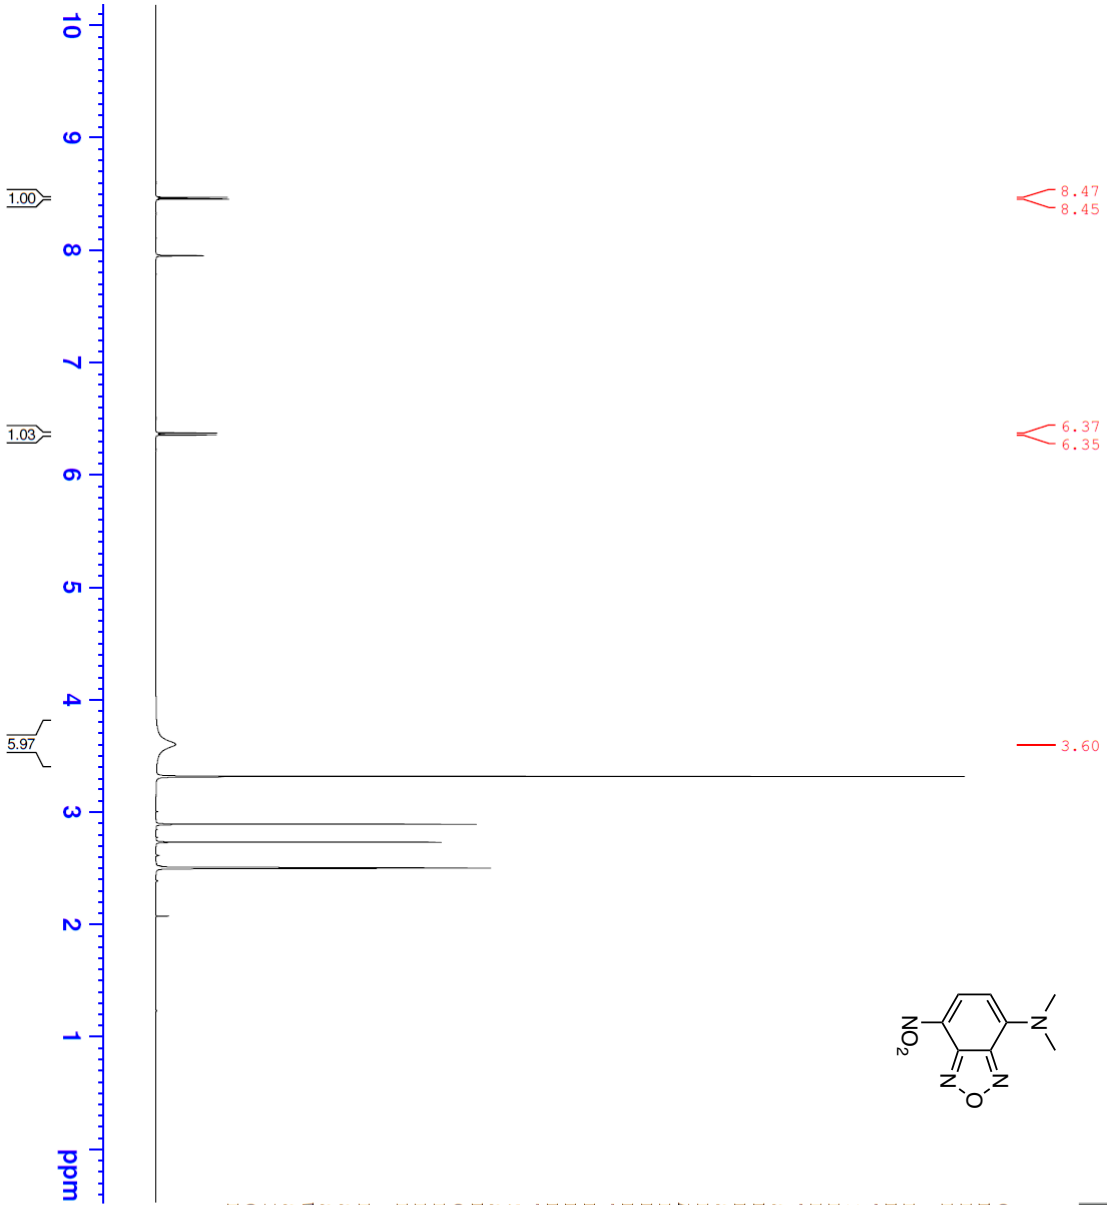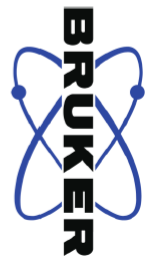

Current Data Parameters  
 NAME jp.KR35.200930  
 EXPNO 7  
 PROCNO 1

F2 - Acquisition Parameters  
 Date\_ 20200930  
 Time\_ 15.12 h

INSTRUM spect  
 PROBHD Z75812\_0039 (C  
 PULPROG pf1h  
 TD 32768  
 SOLVENT DMSO  
 NS 32

DS 2  
 SWH 10000.000 Hz  
 FIDRES 0.610352 Hz  
 AQ 1.6384000 sec

RG 32  
 DW 50.000 usec  
 DE 6.50 usec  
 TE 300.0 K

D1 18.00000000 sec  
 D11 0.03000000 sec  
 D12 0.00002000 sec

TD 1  
 ZGPGTNS  
 SF01 600.1828200 MHz  
 NUC1 1H  
 CNST1 1.0000000

P0 6.98 usec  
 P1 6.98 usec  
 P1M1 10.00000000 W

F2 - Processing parameters  
 SI 131072  
 SF 600.1800048 MHz  
 WDW QSINE  
 SSB 2  
 LB 0 Hz  
 GB 0  
 PC 1.00

147.10  
 145.35  
 145.26  
 136.64  
 120.21  
 102.65  
 44.00

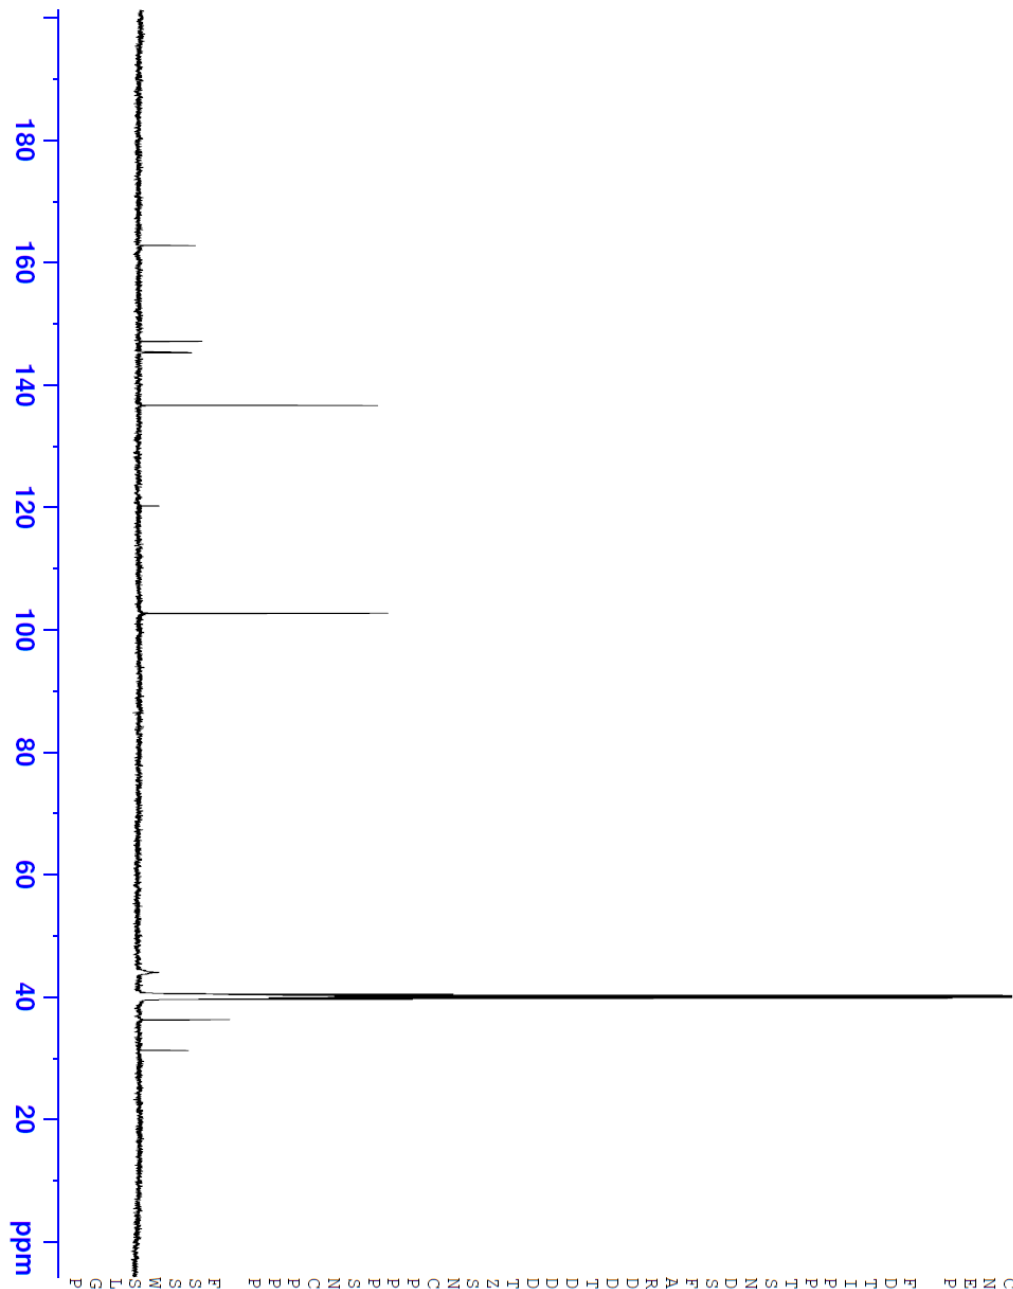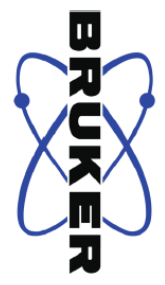

Current Data Parameters  
 NAME jh.KR35.200930  
 EXPNO 8  
 PROCNO 1

F2 - Acquisition Parameters

Date\_ 20200930  
 Time 15.22 h  
 INSTRUM spect  
 PROBHD z75812\_0039 (C  
 PULPROG MPRhetrfold  
 TD 131072  
 SOLVENT DMSO  
 NS 128  
 DS 2  
 SWH 31250.000 Hz  
 FIDRES 0.476837 Hz  
 AQ 2.0971520 sec  
 RG 256  
 DW 16.000 usec  
 DE 20.00 usec  
 TE 300.0 K  
 D1 2.00000000 sec  
 D11 0.03000000 sec  
 D12 0.00002000 sec  
 TD0 1

ZGPTNS -Ddc -Dnoe  
 SFO1 150.9301310 MHz  
 NUC1 13C  
 CNST1 1.0000000  
 P0 11.43 usec  
 P3 11.43 usec  
 PLM1 120.23000336 W  
 SFO2 600.1828200 MHz  
 NUC2 1H  
 CPDPRG1 waltz16  
 PCPD2 80.00 usec  
 PLM2 10.00000000 W  
 PLM19 0.07620790 W

F2 - Processing parameters

SI 131072  
 SF 150.9153819 MHz  
 MDM 0  
 SSB 0  
 LB 3.00 Hz  
 GB 0  
 PC 1.40

3.14. *N,N*-Bis(methyl-d3)-7-nitrobenzo[*c*][1,2,5]oxadiazol-4-amine (NBD-d6)

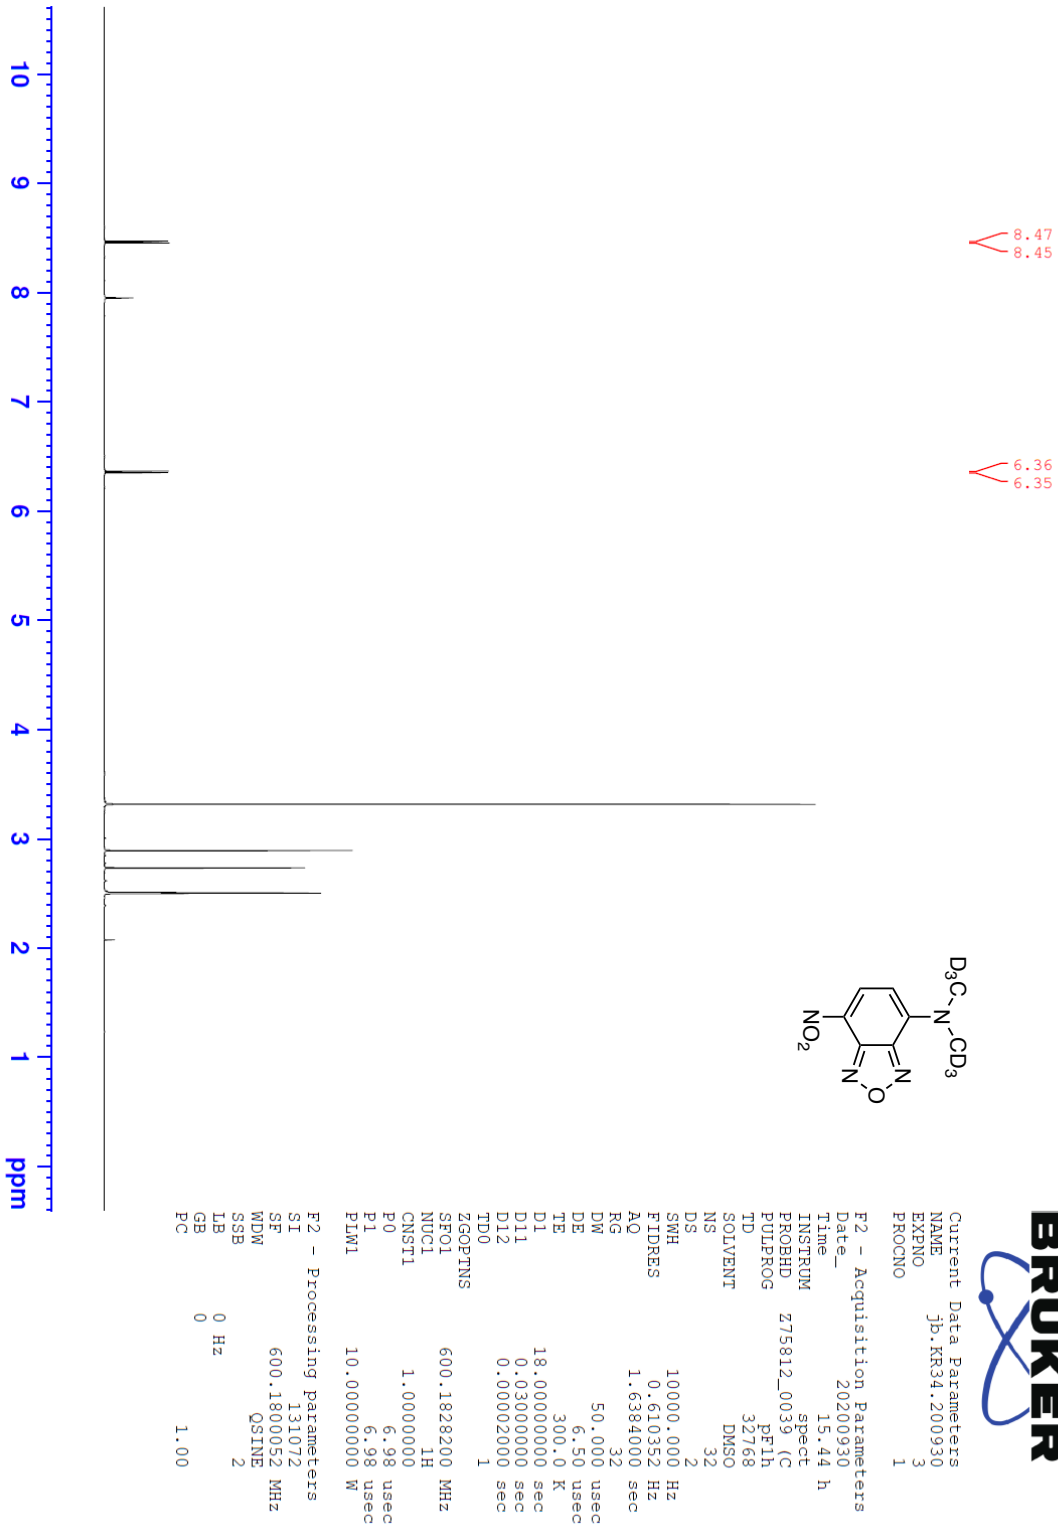

147.18  
 145.32  
 145.26  
 136.66  
 120.15  
 102.57

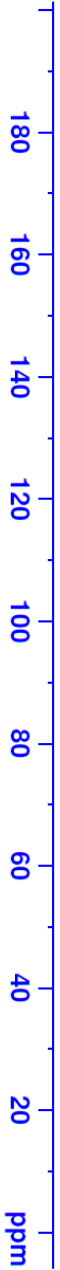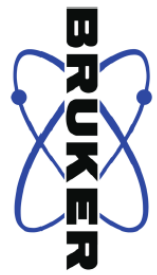

Current Data Parameters  
 NAME jh.KR34.200930  
 EXPNO 4  
 PROCNO 1

F2 - Acquisition Parameters  
 Date\_ 20200930  
 Time 17.06 h

INSTRUM spect  
 PROBHD 275812\_0039 (C  
 PULPROG Mphetrolid  
 TD 131072  
 SOLVENT DMSO  
 NS 1024  
 DS 2  
 SWH 31250.000 Hz  
 FIDRES 0.476837 Hz  
 AQ 2.0971520 sec

RG 256  
 DW 16.000 usec  
 DE 20.00 usec  
 TE 300.0 K  
 D1 2.00000000 sec  
 D11 0.03000000 sec  
 D12 0.00002000 sec  
 TD0 1

ZGPGTNS 1  
 SFO1 -Ddc -Dnoe 150.9301310 MHz  
 NUC1 13C  
 CNST1 1.0000000  
 P0 11.43 usec  
 P3 11.43 usec  
 PLW1 120.23000336 W  
 SFO2 600.1828200 MHz

NUC2 1H  
 CPDPRGf1 waltz16  
 PCPD2 80.00 usec  
 PLM2 10.00000000 W  
 PLM19 0.07620790 W

F2 - Processing Parameters  
 SI 131072  
 SF 150.9153830 MHz  
 WDW no  
 SSB 0 Hz  
 GB 0  
 PC 1.40

3.15. 3,7-Bis(dimethylamino)phenothiazin-5-ium (Methylene Blue)

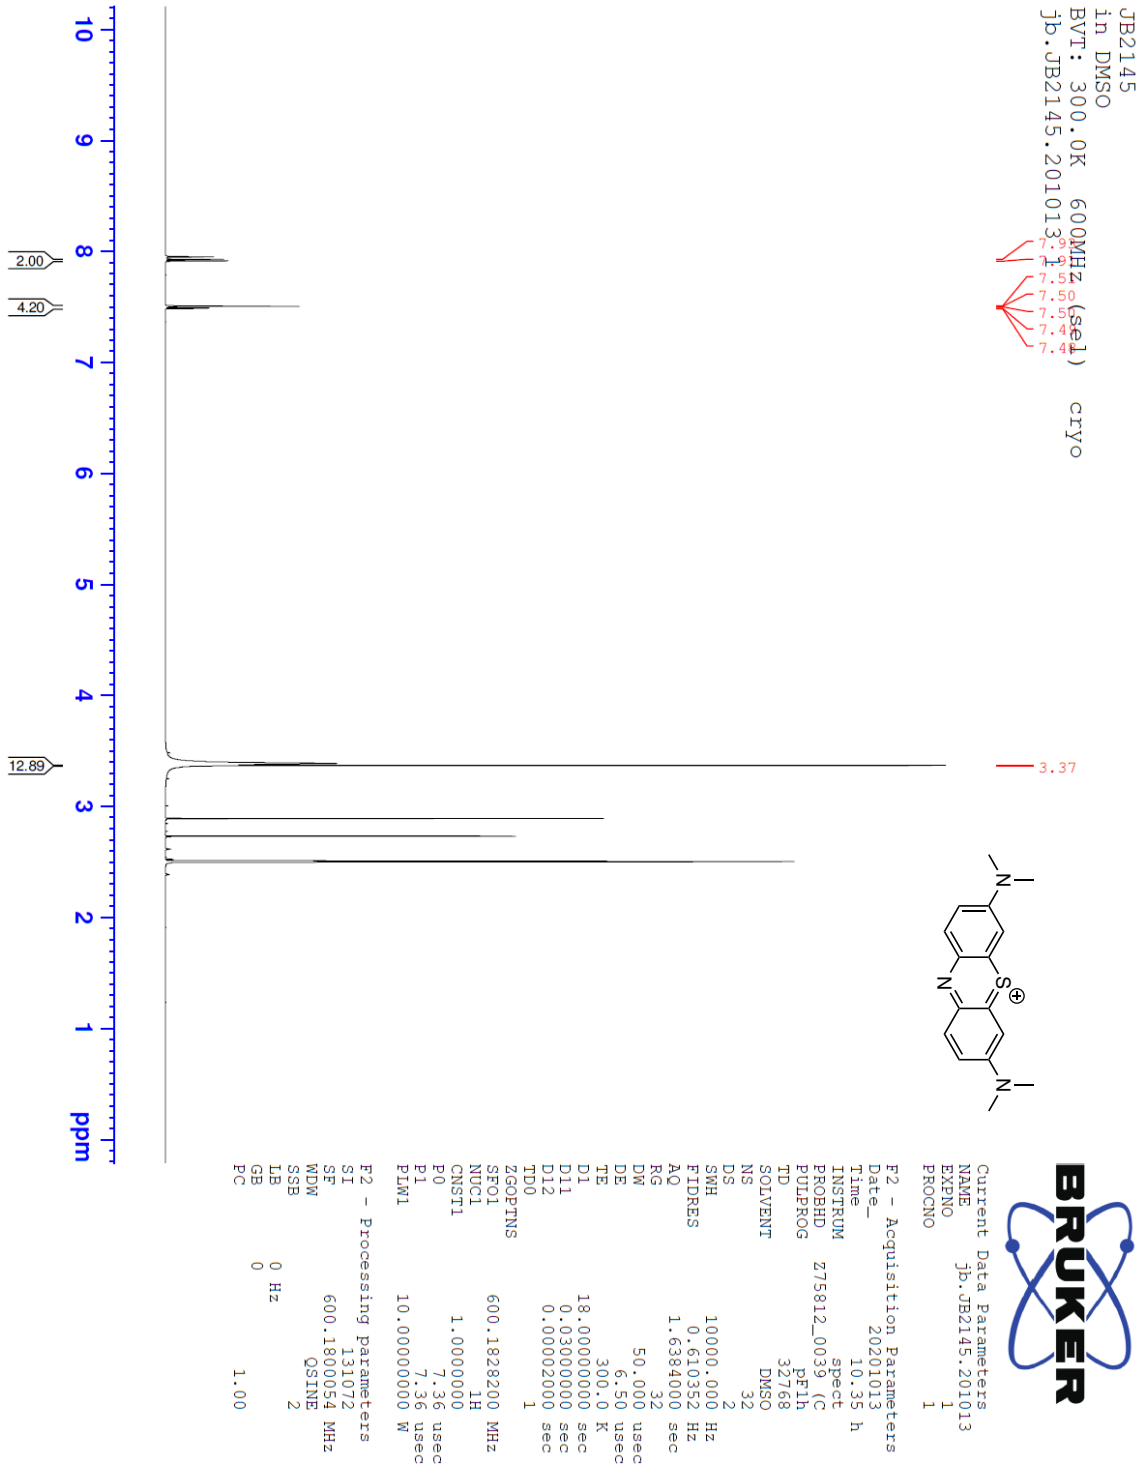

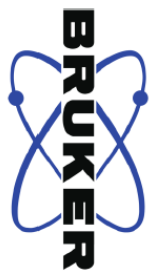

Current Data Parameters  
NAME Jb.JB2145.201013  
EXPNO 2  
PROCNO 1

F2 - Acquisition Parameters

Date\_ 20201013  
Time 10.49 h  
INSTRUM spect  
PROBHD Z75812\_0039 (C  
PULPROG Mhetezoid  
TD 65536  
SOLVENT DMSO  
NS 256

DS 0  
SWH 31250.000 Hz  
FIDRES 0.953674 Hz  
AQ 1.0485760 sec

RG 256  
DM 16.000 usec  
DE 20.00 usec  
TE 300.0 K  
D1 2.0000000 sec  
D11 0.0300000 sec  
D12 0.0000200 sec  
TDO 1

ZGPTNS -Ddc -Dnoe  
SFO1 150.9301310 MHz  
NUC1 13C  
CNST1 1.0000000

P0 11.43 usec  
P3 11.43 usec  
PLM1 120.23000336 W  
SFO2 600.1828200 MHz  
NUC2 1H  
CPDPRG1 waltz16  
PCPD2 80.00 usec  
PLM2 10.00000000 W  
PLM19 0.09751600 W

F2 - Processing parameters

SI 32768  
SF 150.9153833 MHz  
WDW EM  
SSB 0  
LB 1.00 Hz  
GB 0  
PC 1.40

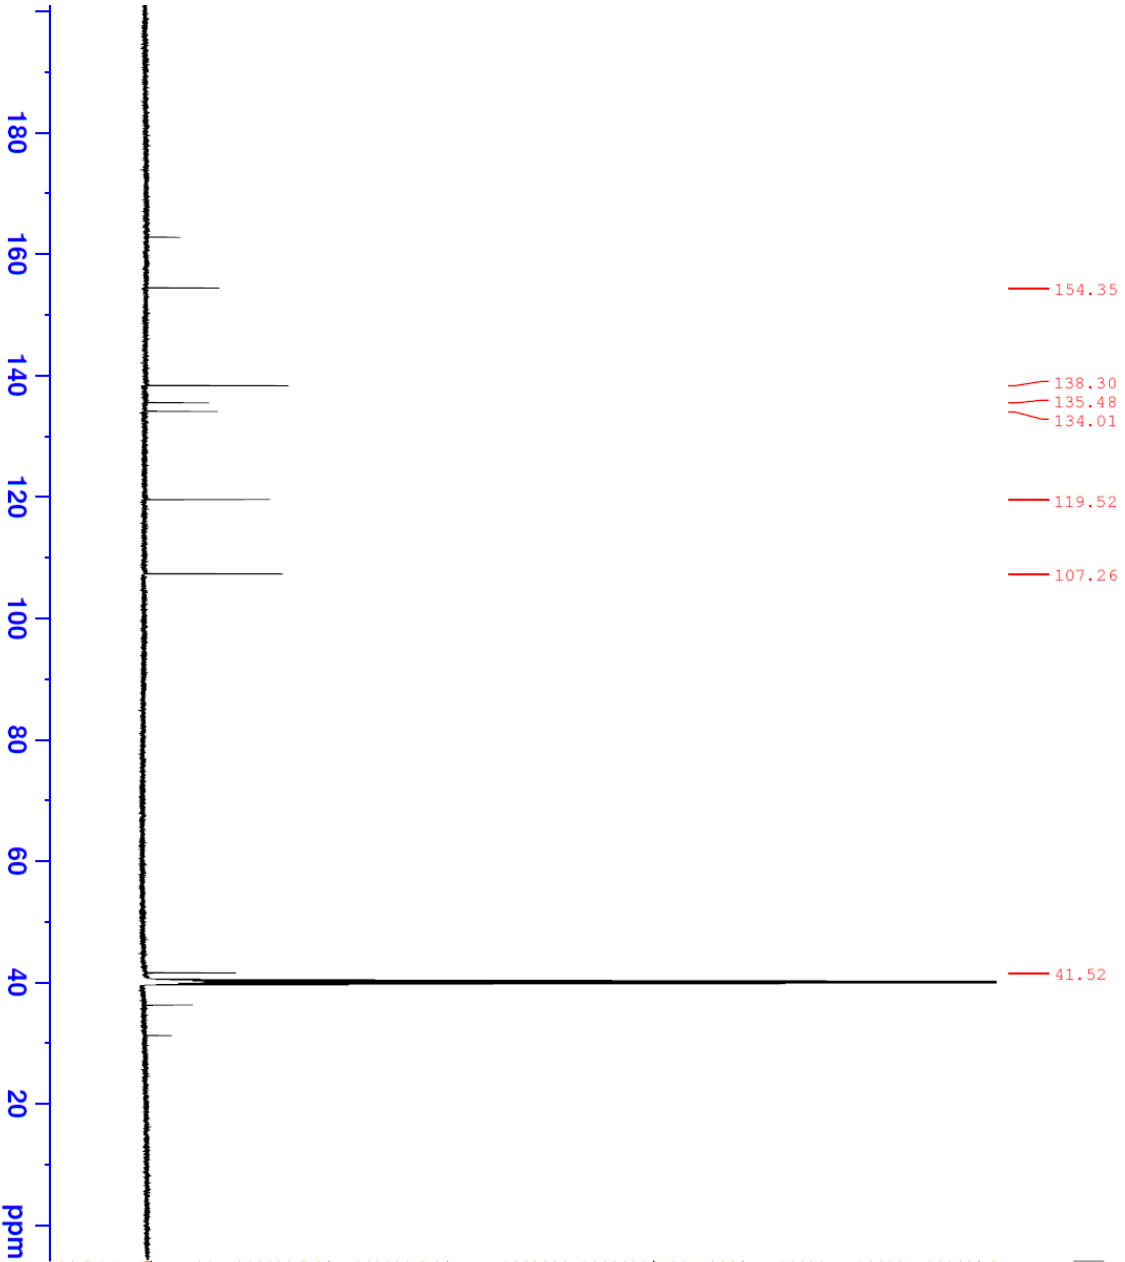

3.16. 3,7-Bis(bis(methyl-d3)amino)phenothiazin-5-ium (Methylene Blue-d12)

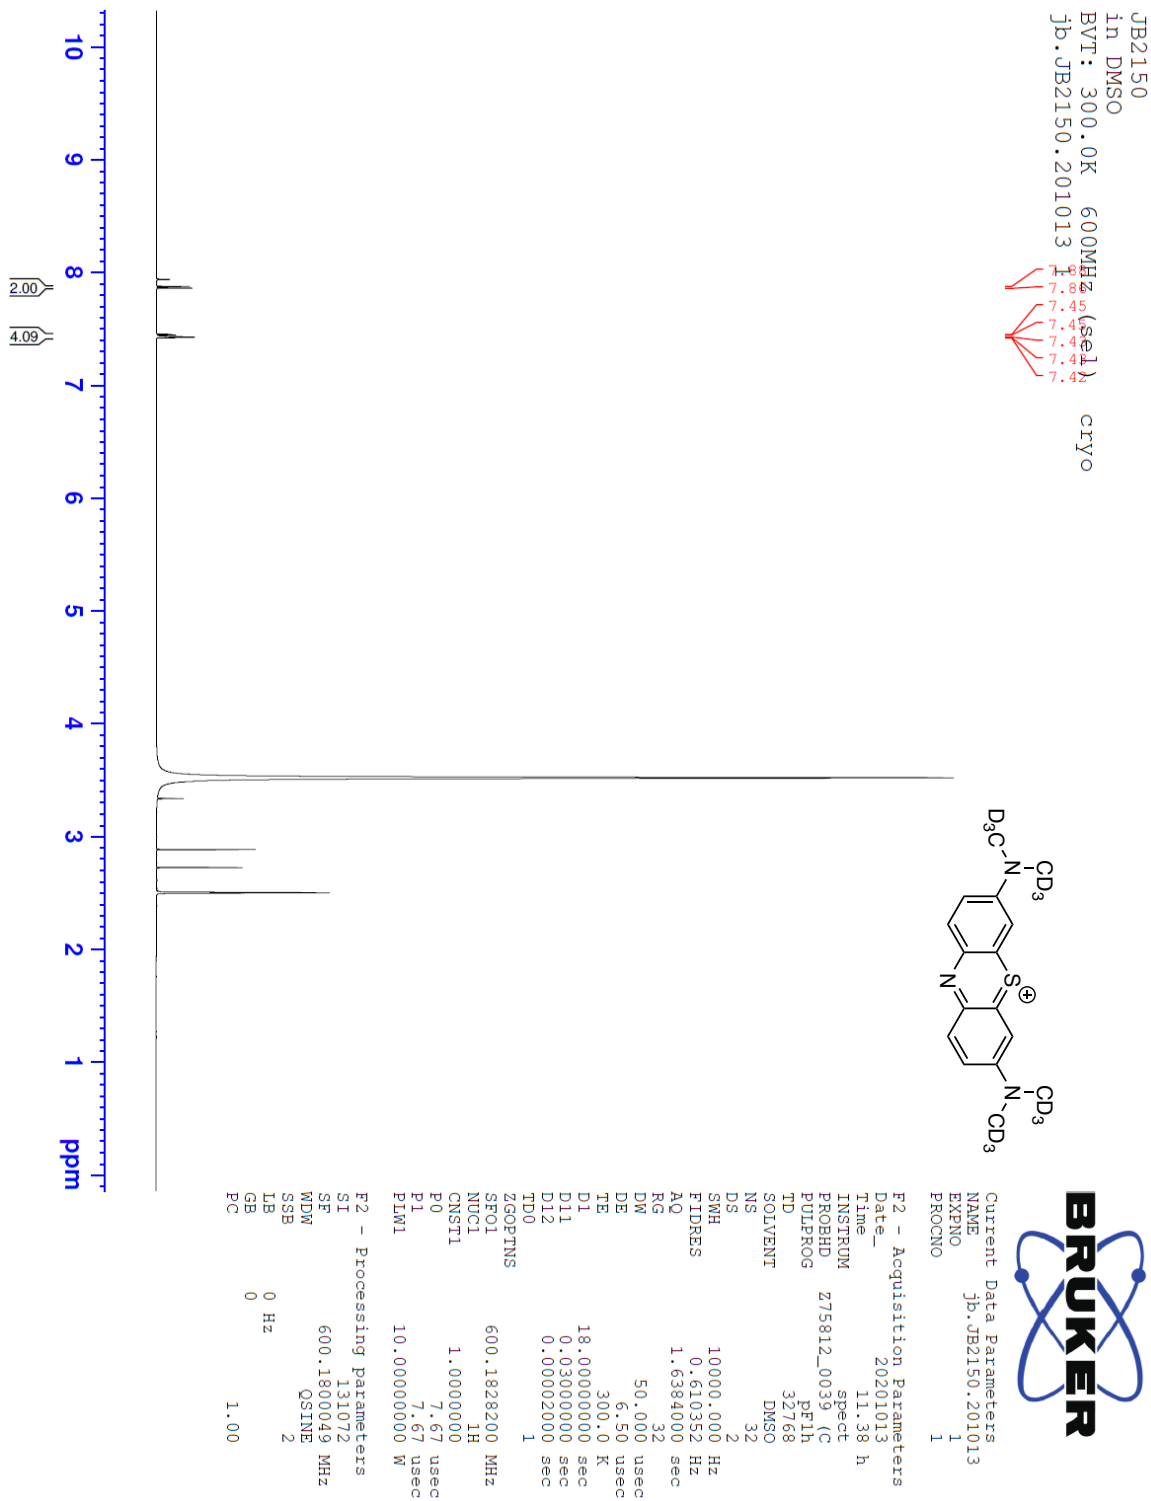



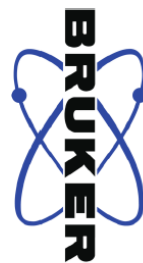

Current Data Parameters  
NAME jb.JB2150.201013  
EXPNO 2  
PROCNO 1

F2 - Acquisition Parameters

Date\_ 20201013  
Time 11.52 h  
INSTRUM spect  
PROBHD 75812\_0039 (C  
PULPROG Mhetezoid  
TD 65536  
SOLVENT DMSO  
NS 256  
DS 0  
SWH 31250.000 Hz  
FIDRES 0.953674 Hz  
AQ 1.0485760 sec  
RG 256  
DM 16.000 usec  
DE 20.00 usec  
TE 300.0 K  
D1 2.00000000 sec  
D11 0.03000000 sec  
D12 0.00002000 sec  
TD0 1  
ZGPTNS -Ddc -Dnoe  
SFO1 150.9301310 MHz  
NUC1 13C  
CNST1 1.0000000  
P0 1.43 usec  
P3 11.43 usec  
PLW1 120.23000336 W  
SFO2 600.1828200 MHz  
NUC2 1H  
CPDPRG1 waltz16  
PCPD2 80.00 usec  
PLW2 10.00000000 W  
PLW19 0.09751600 W

F2 - Processing parameters

SI 32768  
SE 150.9153657 MHz  
WDW EM  
SSB 0  
LB 1.00 Hz  
GB 0  
PC 1.40

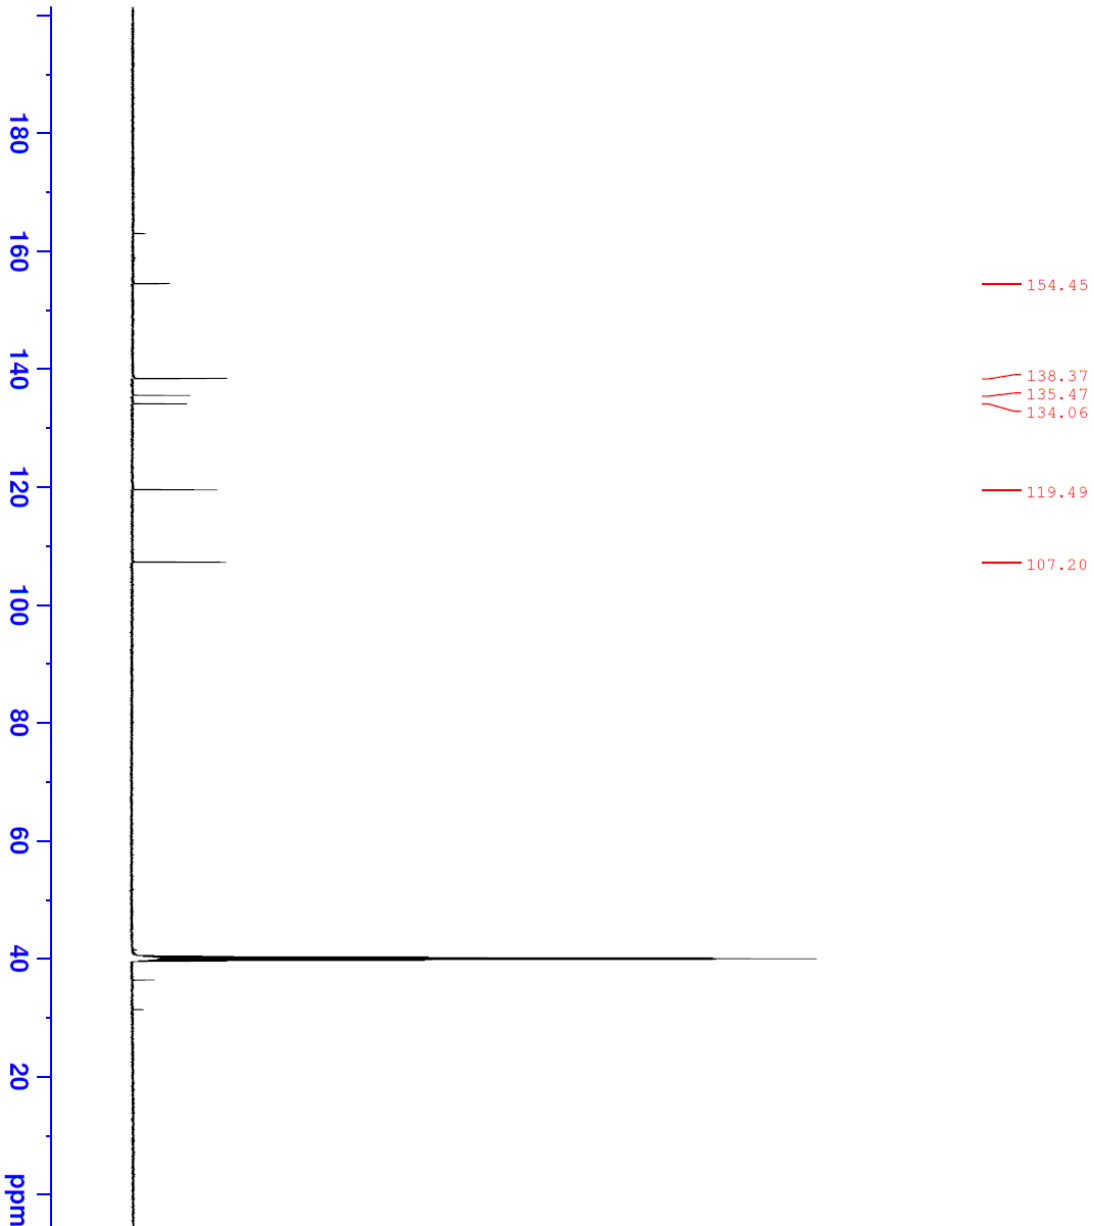

#### 4. SNAP<sub>f</sub> construct

SNAP<sub>f</sub> sequence:

MAS<sup>W</sup>SH<sup>P</sup>Q<sup>F</sup>E KGAD<sup>D</sup>DD<sup>D</sup>KVP HMDKDC<sup>E</sup>MKR TTLDSPLG<sup>K</sup>L EL<sup>S</sup>GCEQGL<sup>H</sup> RIIFLG<sup>K</sup>GTS  
 AADAVE<sup>V</sup>PAP AAVLGG<sup>P</sup>EPL MQATAWLN<sup>A</sup>Y FHQPEAIE<sup>E</sup>F PVPALHHP<sup>V</sup>FV QQESFTR<sup>Q</sup>VL  
 WKLLKVV<sup>K</sup>FG EVISYSH<sup>L</sup>AA LAGNPAATA<sup>A</sup> VKTALSGNP<sup>V</sup> PILIPCHR<sup>V</sup>V QGDLDVGG<sup>Y</sup>E  
 GGLAVKE<sup>W</sup>LL AHEGHR<sup>L</sup>GKP GLGAPGF<sup>S</sup>SI SA<sup>H</sup>HHHHHHHHH

Strep-Tag II, Enterokinase-site, SNAP<sub>f</sub>, His-Tag

#### 5. SNAP-Halo construct and mass spectrometry

SNAP-Halo sequence:

MAS<sup>W</sup>SH<sup>P</sup>Q<sup>F</sup>E KGAD<sup>D</sup>DD<sup>D</sup>KVP HMDKDC<sup>E</sup>MKR TTLDSPLG<sup>K</sup>L EL<sup>S</sup>GCEQGL<sup>H</sup> EIIFLG<sup>K</sup>GTS  
 AADAVE<sup>V</sup>PAP AAVLGG<sup>P</sup>EPL MQATAWLN<sup>A</sup>Y FHQPEAIE<sup>E</sup>F PVPALHHP<sup>V</sup>FV QQESFTR<sup>Q</sup>VL  
 WKLLKVV<sup>K</sup>FG EVISYSH<sup>L</sup>AA LAGNPAATA<sup>A</sup> VKTALSGNP<sup>V</sup> PILIPCHR<sup>V</sup>V QGDLDVGG<sup>Y</sup>E  
 GGLAVKE<sup>W</sup>LL AHEGHR<sup>L</sup>GKP GLGGR<sup>L</sup>EV<sup>L</sup>F QGPKAF<sup>L</sup>EGS EIGTGF<sup>P</sup>FD<sup>P</sup> HYVEVL<sup>G</sup>ERM  
 HYVDV<sup>G</sup>PRD<sup>G</sup> TPVLF<sup>L</sup>HGN<sup>P</sup> TSSYV<sup>W</sup>RNI<sup>I</sup> PHVAP<sup>T</sup>HRCI APDLIG<sup>M</sup>GKS DKPDL<sup>G</sup>YFF<sup>D</sup>  
 DHVRF<sup>M</sup>DAFI EALGLE<sup>E</sup>VVL VIHDW<sup>G</sup>SAL<sup>G</sup> FHWAK<sup>R</sup>NPER VKGIA<sup>F</sup>MEFI RPIPT<sup>W</sup>DEW<sup>P</sup>  
 EFARE<sup>T</sup>FQAF RTTDV<sup>G</sup>RKLI IDQNV<sup>F</sup>IEGT LPMGV<sup>V</sup>RPLT EVEMD<sup>H</sup>YREP FLNPV<sup>D</sup>REPL  
 WRF<sup>P</sup>NELPIA GEPANI<sup>V</sup>ALV EYMD<sup>W</sup>LHQ<sup>S</sup> PVPK<sup>L</sup>LFWGT PGVLIP<sup>P</sup>AEA ARLAK<sup>S</sup>LPNC  
 KAVDIG<sup>P</sup>GLN LLQED<sup>N</sup>PDLI GSEIAR<sup>W</sup>LST LEISG<sup>A</sup>PGFS SIS<sup>A</sup>HHHHHHH HHHH\*

Strep-Tag II, Enterokinase-site, SNAP, Precision Sequence, Halo, His-Tag

| Condition                       | calc. | found |
|---------------------------------|-------|-------|
| SNAP-Halo                       | 59072 | 59069 |
| SNAP-Halo:BG-TMR+CA-SiR         | 60244 | 60245 |
| SNAP-Halo:BG-SiR+CA-TMR         | 60244 | 60241 |
| SNAP-Halo:BG-TMR-d12+CA-SiR-d12 | 60268 | 60269 |
| SNAP-Halo:BG-SiR-d12+CA-TMR-d12 | 60268 | 60267 |
| SNAP-Halo:BG-TMR                | 59603 | 59602 |
| SNAP-Halo:BG-SiR                | 59645 | 59642 |
| SNAP-Halo:CA-TMR                | 59671 | 59669 |
| SNAP-Halo:CA-SiR                | 59713 | 59711 |
| SNAP-Halo:BG-TMR-d12            | 59612 | 59615 |
| SNAP-Halo:BG-SiR-d12            | 59657 | 59656 |
| SNAP-Halo:CA-TMR-d12            | 59683 | 59682 |
| SNAP-Halo:CA-SiR-d12            | 59725 | 59724 |

## 6. Supplementary Figures

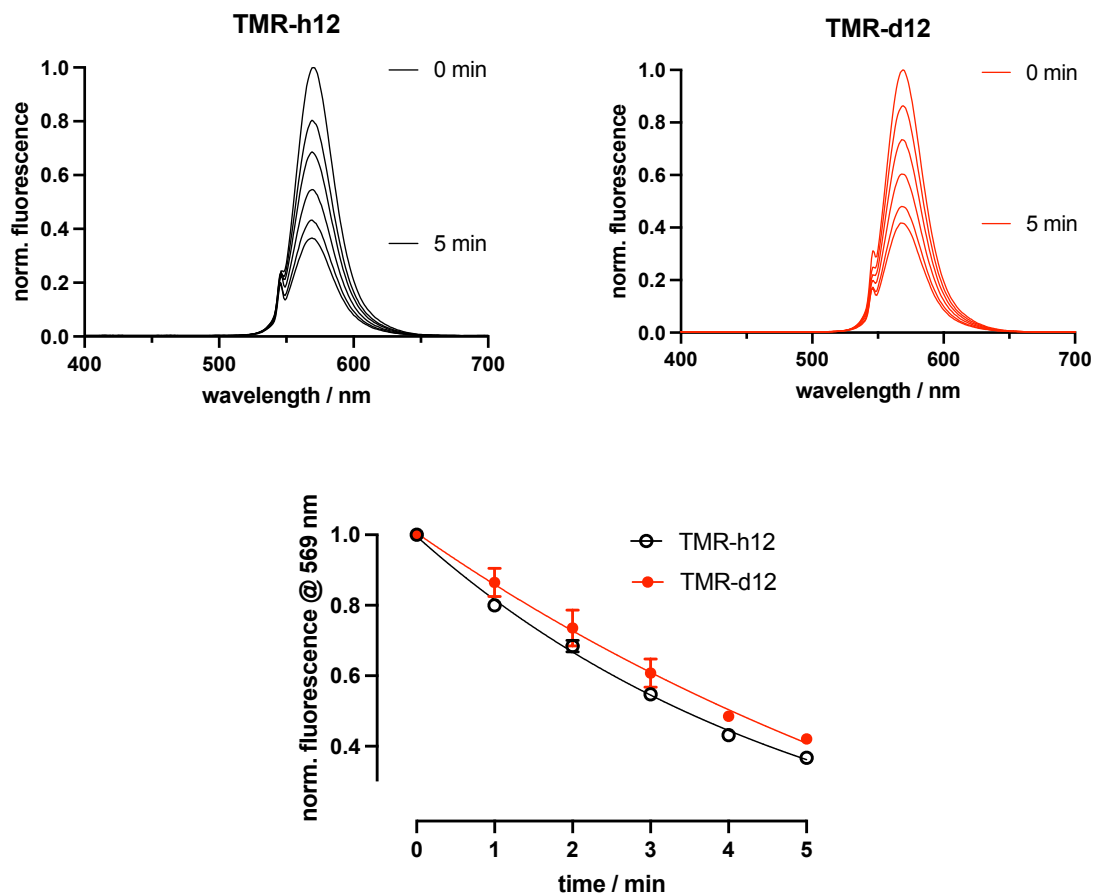

**Supporting Figure 1: In vitro bleaching of TMR and TMR-d12 with white light.** Following fluorescence emission after 0, 1, 2, 3, 4, and 5 minutes of irradiation (top). Normalized fluorescence at 569 nm plotted over time (bottom). Mean $\pm$ S.D.

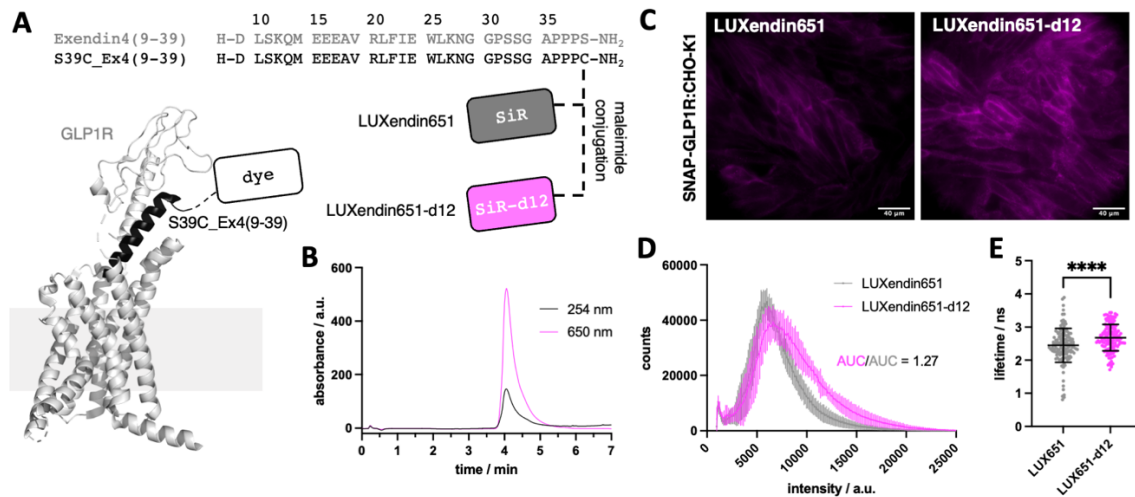

**Supporting Figure 2: LUXendin651 versus LUXendin651-d12 in fixed SNAP-GLP1R:CHO-K1 cells.** A) S39C\_Ex4(9-39) is derived from Exendin4(9-39) with a C-terminal cysteine handle for maleimide bioconjugation with SiR or SiR-d12, yielding LUXendin651 and LUXendin651-d12, respectively, which are high affinity and selective antagonists towards the GLP1R. B) LCMS trace of LUXendin651-d12. C) Labelling of SNAP-GLP1R in fixed CHO-K1 cells with  $n = 2$  biological replicates. Scale bar = 40  $\mu\text{m}$ . D) Pooled raw histograms from five images as represented in (C) show increased brightness of LUXendin651-d12 versus LUXendin651. E) Fluorescence lifetimes of LUXendin651-d12 versus LUXendin651 in fixed SNAP-GLP1R:CHO-K1 cells.  $n > 200$  ROIs, \*\*\*\* indicates statistical significance (unpaired t-test,  $p < E-26$ ). Mean  $\pm$  SD.

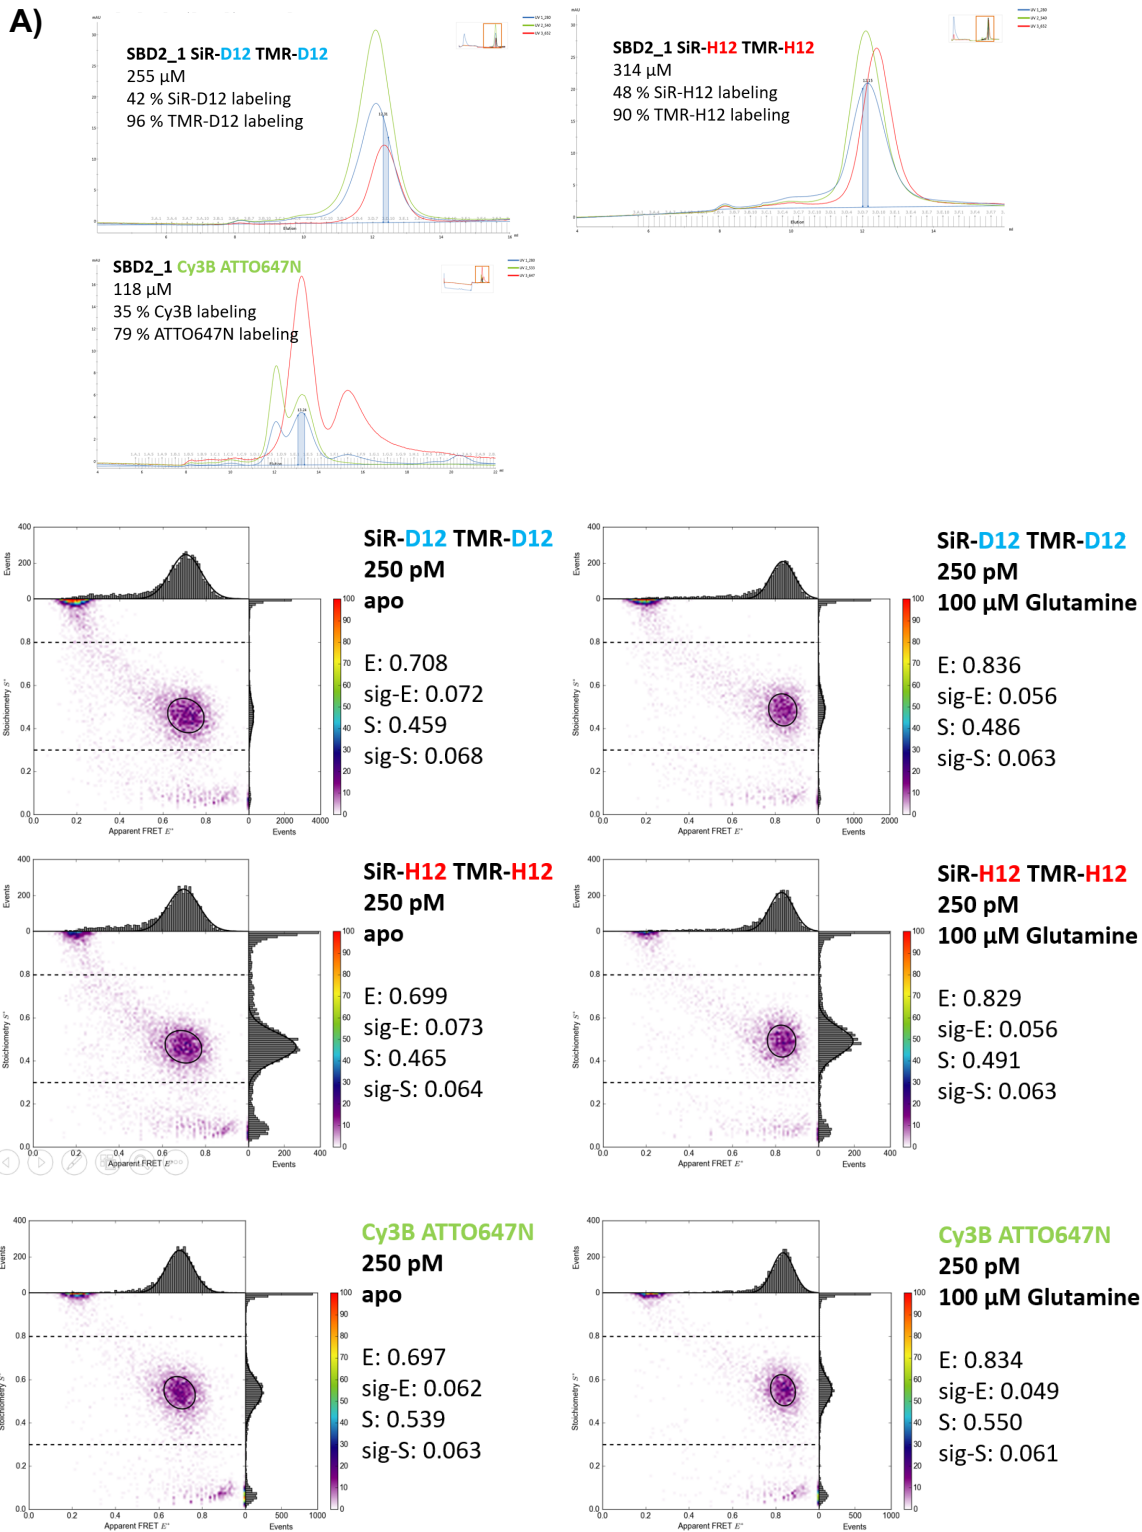

**Supporting Figure 3: Summary of SEC labelling characterization (A) and smFRET data for different fluorophore pairs (B) for stochastic labelling of SBD2.**

## 7. Supplementary Schemes

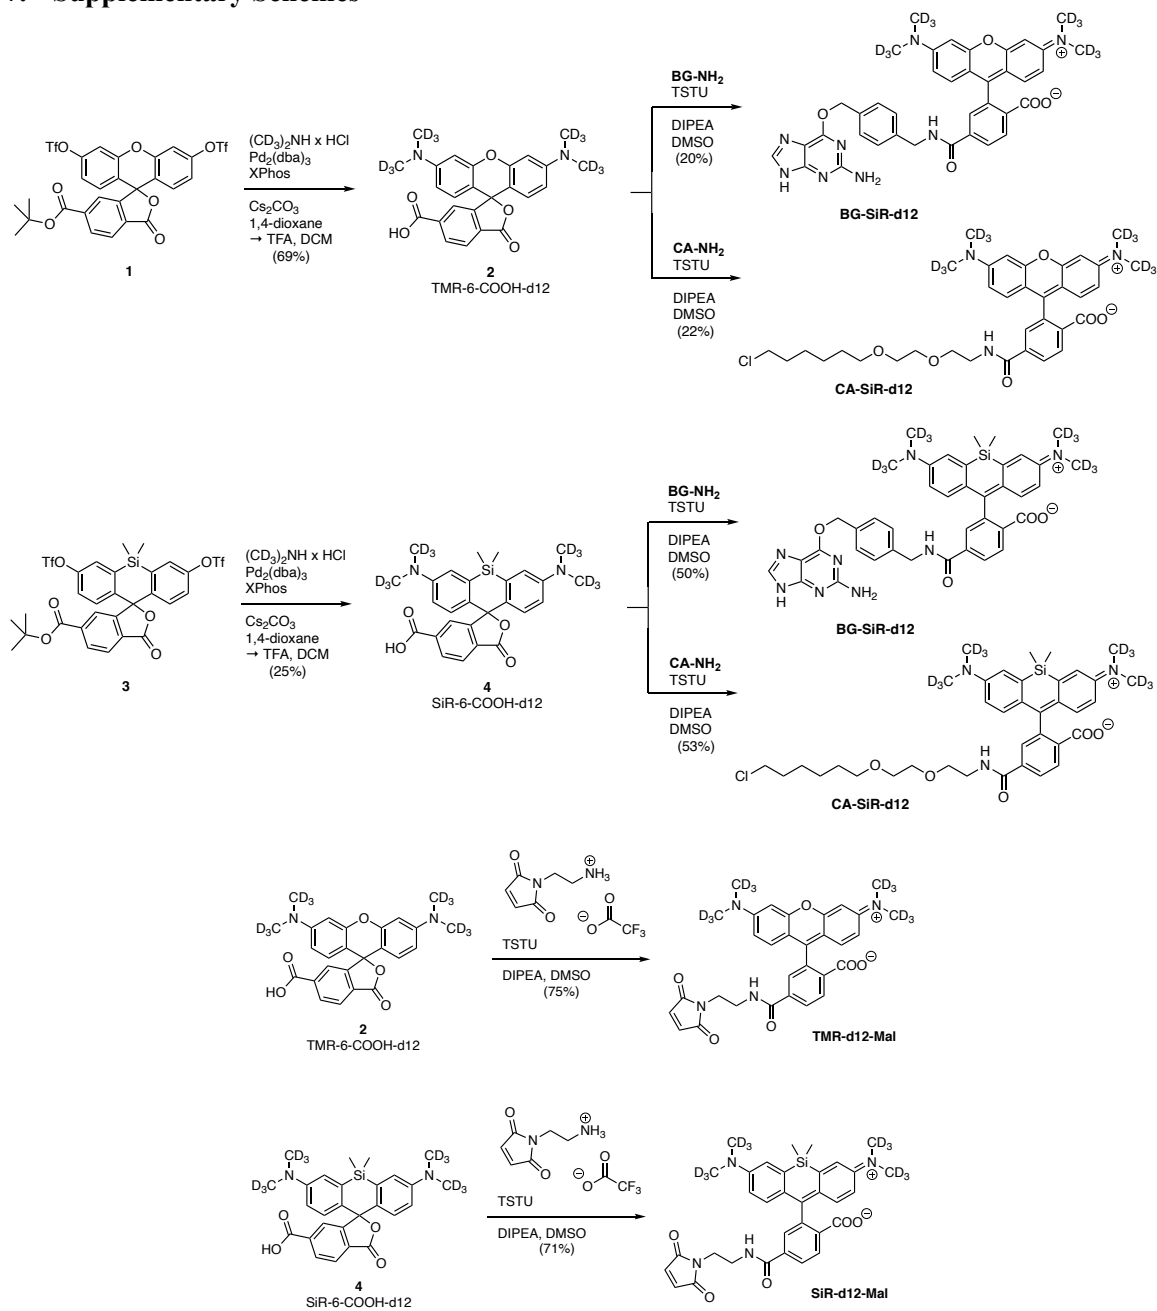

Supporting Scheme 1: Chemical synthesis of rhodamine d12 probes.

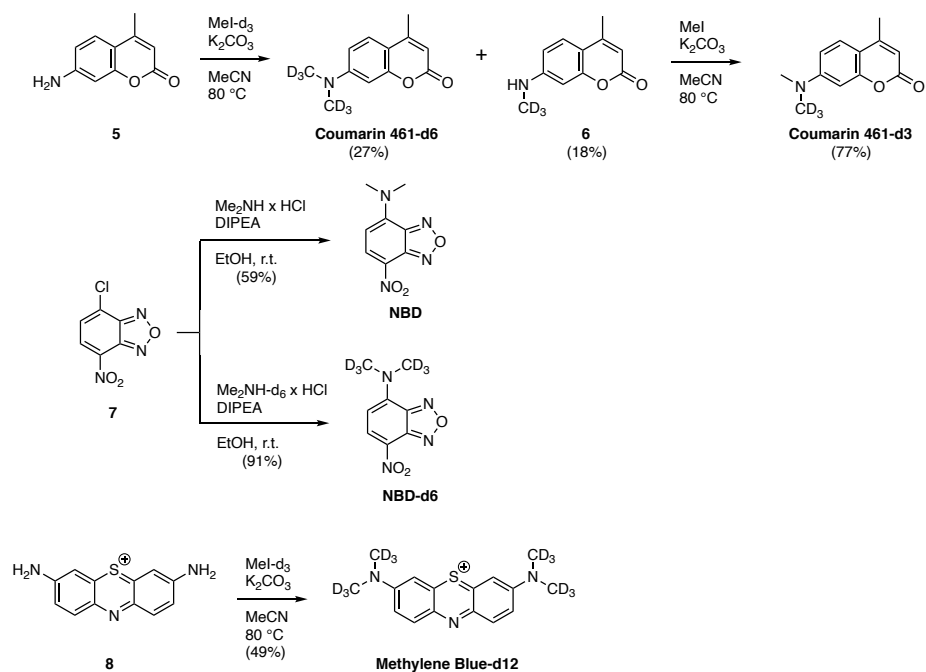

**Supporting Scheme 2: Chemical synthesis of (deuterated) coumarin, NBD and methylene blue.**

## 8. Supplementary Tables

**Table S1: Photophysical parameters from Figure 1 with error margins.**

|                                                         | TMR         | TMR-d12     | SiR           | SiR-d12       |
|---------------------------------------------------------|-------------|-------------|---------------|---------------|
| Ext. coefficient<br>[M <sup>-1</sup> cm <sup>-1</sup> ] | 78,000±200  | 90,000±600  | 141,000±1,000 | 156,000±1,600 |
| Quantum yield<br>(integrating<br>sphere) [%]            | 43.1±5.2    | 51.3±5.0    | 35.3±4.8      | 46.1±3.0      |
| Lifetime [ns]                                           | 2.287±0.392 | 2.588±0.495 | 2.898±0.383   | 3.534±0.164   |

**Table S2: Photophysical parameters for LUXendin651(-d12).**

|               | LUXendin651 | LUXendin651-d12 |
|---------------|-------------|-----------------|
| Lifetime [ns] | 2.448±0.513 | 2.682±0.400     |

**Table S3: Photophysical parameters from Figure 4 with error margins.**

|                                                         | Coumarin461<br>Coumarin461-d6 | NBD<br>NBD-d6              | Methylene blue<br>Methylene blue-d12 |
|---------------------------------------------------------|-------------------------------|----------------------------|--------------------------------------|
| Ext. coefficient<br>[M <sup>-1</sup> cm <sup>-1</sup> ] | 28,100±400<br>27,900±2,000    | 16,300±700<br>16,000±1,000 | 45,500±2,500<br>49,800±1,800         |
| Quantum yield<br>(platreader) [%]                       | 19±0.2<br>27±2.4              | 55±7.0<br>59±1.8           | 1.0±0.05<br>1.3±0.02                 |

**Table S4: Temperature-dependent lifetimes from Figure 5.**

| Lifetime [ns] | Halo:SiR  | Halo:SiR-d12 | SNAP:SiR  | SNAP:SiR-d12 |
|---------------|-----------|--------------|-----------|--------------|
| 20 °C         | 3.53±0.05 | 4.02±0.04    | 3.26±0.27 | 3.75±0.28    |
| 30 °C         | 3.39±0.04 | 3.89±0.03    | 3.03±0.02 | 3.51±0.05    |
| 40 °C         | 3.16±0.04 | 3.68±0.03    | 2.84±0.02 | 3.37±0.03    |

**Table S5: Normalized values from Table S3.**

| Lifetime [%] | Halo:SiR | Halo:SiR-d12 | SNAP:SiR | SNAP:SiR-d12 |
|--------------|----------|--------------|----------|--------------|
| 20 °C        | 100      | 100          | 100      | 100          |
| 30 °C        | 96.2±0.7 | 96.8±0.5     | 93.5±7.0 | 93.9±5.3     |
| 40 °C        | 89.6±0.2 | 91.5±0.6     | 87.8±7.5 | 90.3±6.7     |



## 9. References

1. Farrants, H. *et al.* SNAP-Tagged Nanobodies Enable Reversible Optical Control of a G Protein-Coupled Receptor *via* a Remotely Tethered Photoswitchable Ligand. *ACS Chem. Biol.* **13**, 2682–2688 (2018).
2. Grimm, J. B. *et al.* A general method to improve fluorophores for live-cell and single-molecule microscopy. *Nat. Methods* **12**, 244–250 (2015).
3. Ast, J. *et al.* Super-resolution microscopy compatible fluorescent probes reveal endogenous glucagon-like peptide-1 receptor distribution and dynamics. *Nat. Commun.* **11**, 467 (2020).
